# Supplementary material for: Structure–Activity Relationship of Piplartine and Synthetic Analogues against Schistosoma mansoni and Cytotoxicity to Mammalian Cells
Source: PubMed Central journal article supplement (PMC6032158; doi:10.3390/ijms19061802), 2018-06-19

## Supplementary Materials

**Table S1.** *In vitro* effect of piplartine and analogues against 49-day-old *S. mansoni*.

| Group                     | Period of incubation (h) | Dead worms (%) <sup>a</sup> |     | Motor activity reduction (%) <sup>a</sup> |     |             |     |     |
|---------------------------|--------------------------|-----------------------------|-----|-------------------------------------------|-----|-------------|-----|-----|
|                           |                          | M                           | F   | Slight                                    |     | Significant |     |     |
|                           |                          |                             |     | M                                         | F   | M           | F   |     |
| Control <sup>b</sup>      | 24                       | 0                           | 0   | 0                                         | 0   | 0           | 0   |     |
|                           | 48                       | 0                           | 0   | 0                                         | 0   | 0           | 0   |     |
|                           | 72                       | 0                           | 0   | 0                                         | 0   | 0           | 0   |     |
|                           | 96                       | 0                           | 0   | 0                                         | 0   | 0           | 0   |     |
| 0.5% DMSO                 | 24                       | 0                           | 0   | 0                                         | 0   | 0           | 0   |     |
|                           | 48                       | 0                           | 0   | 0                                         | 0   | 0           | 0   |     |
|                           | 72                       | 0                           | 0   | 0                                         | 0   | 0           | 0   |     |
|                           | 96                       | 0                           | 0   | 0                                         | 0   | 0           | 0   |     |
| Praziquantel<br>2 $\mu$ M | 24                       | 100                         | 100 | 0                                         | 0   | 100         | 100 |     |
|                           | 48                       | 100                         | 100 | 0                                         | 0   | 100         | 100 |     |
|                           | 72                       | 100                         | 100 | 0                                         | 0   | 100         | 100 |     |
|                           | 96                       | 100                         | 100 | 0                                         | 0   | 100         | 100 |     |
| Amide piplartine          | 24                       | 100                         | 100 | 0                                         | 0   | 100         | 100 |     |
|                           | 10 $\mu$ M               | 48                          | 100 | 100                                       | 0   | 0           | 100 | 100 |
|                           |                          | 72                          | 100 | 100                                       | 0   | 0           | 100 | 100 |
|                           |                          | 96                          | 100 | 100                                       | 0   | 0           | 100 | 100 |
|                           | 5 $\mu$ M                | 24                          | 0   | 0                                         | 100 | 100         | 0   | 0   |
|                           |                          | 48                          | 0   | 0                                         | 100 | 100         | 0   | 0   |
|                           |                          | 72                          | 0   | 0                                         | 100 | 100         | 0   | 0   |
|                           |                          | 96                          | 60  | 60                                        | 0   | 0           | 60  | 60  |
| Amide 1G                  | 24                       | 0                           | 0   | 0                                         | 0   | 0           | 0   |     |
|                           | 50 $\mu$ M               | 48                          | 0   | 0                                         | 0   | 0           | 0   | 0   |
|                           |                          | 72                          | 0   | 0                                         | 0   | 0           | 0   | 0   |
|                           |                          | 96                          | 0   | 0                                         | 0   | 0           | 0   | 0   |
|                           | 25 $\mu$ M               | 24                          | 0   | 0                                         | 0   | 0           | 0   | 0   |
|                           |                          | 48                          | 0   | 0                                         | 0   | 0           | 0   | 0   |
|                           |                          | 72                          | 0   | 0                                         | 0   | 0           | 0   | 0   |

|                 |    |   |   |   |   |   |   |
|-----------------|----|---|---|---|---|---|---|
|                 | 96 | 0 | 0 | 0 | 0 | 0 | 0 |
| 10 $\mu$ M      | 24 | 0 | 0 | 0 | 0 | 0 | 0 |
|                 | 48 | 0 | 0 | 0 | 0 | 0 | 0 |
|                 | 72 | 0 | 0 | 0 | 0 | 0 | 0 |
|                 | 96 | 0 | 0 | 0 | 0 | 0 | 0 |
| 5 $\mu$ M       | 24 | 0 | 0 | 0 | 0 | 0 | 0 |
|                 | 48 | 0 | 0 | 0 | 0 | 0 | 0 |
|                 | 72 | 0 | 0 | 0 | 0 | 0 | 0 |
|                 | 96 | 0 | 0 | 0 | 0 | 0 | 0 |
| <b>Amide 1M</b> | 24 | 0 | 0 | 0 | 0 | 0 | 0 |
| 50 $\mu$ M      | 48 | 0 | 0 | 0 | 0 | 0 | 0 |
|                 | 72 | 0 | 0 | 0 | 0 | 0 | 0 |
|                 | 96 | 0 | 0 | 0 | 0 | 0 | 0 |
| 25 $\mu$ M      | 24 | 0 | 0 | 0 | 0 | 0 | 0 |
|                 | 48 | 0 | 0 | 0 | 0 | 0 | 0 |
|                 | 72 | 0 | 0 | 0 | 0 | 0 | 0 |
|                 | 96 | 0 | 0 | 0 | 0 | 0 | 0 |
| 10 $\mu$ M      | 24 | 0 | 0 | 0 | 0 | 0 | 0 |
|                 | 48 | 0 | 0 | 0 | 0 | 0 | 0 |
|                 | 72 | 0 | 0 | 0 | 0 | 0 | 0 |
|                 | 96 | 0 | 0 | 0 | 0 | 0 | 0 |
| 5 $\mu$ M       | 24 | 0 | 0 | 0 | 0 | 0 | 0 |
|                 | 48 | 0 | 0 | 0 | 0 | 0 | 0 |
|                 | 72 | 0 | 0 | 0 | 0 | 0 | 0 |
|                 | 96 | 0 | 0 | 0 | 0 | 0 | 0 |
| <b>Amide 6B</b> | 24 | 0 | 0 | 0 | 0 | 0 | 0 |
| 50 $\mu$ M      | 48 | 0 | 0 | 0 | 0 | 0 | 0 |
|                 | 72 | 0 | 0 | 0 | 0 | 0 | 0 |
|                 | 96 | 0 | 0 | 0 | 0 | 0 | 0 |
| 25 $\mu$ M      | 24 | 0 | 0 | 0 | 0 | 0 | 0 |
|                 | 48 | 0 | 0 | 0 | 0 | 0 | 0 |
|                 | 72 | 0 | 0 | 0 | 0 | 0 | 0 |
|                 | 96 | 0 | 0 | 0 | 0 | 0 | 0 |

|                  |    |   |   |   |   |   |   |
|------------------|----|---|---|---|---|---|---|
| 25 $\mu$ M       | 24 | 0 | 0 | 0 | 0 | 0 | 0 |
|                  | 48 | 0 | 0 | 0 | 0 | 0 | 0 |
|                  | 72 | 0 | 0 | 0 | 0 | 0 | 0 |
|                  | 96 | 0 | 0 | 0 | 0 | 0 | 0 |
| 10 $\mu$ M       | 24 | 0 | 0 | 0 | 0 | 0 | 0 |
|                  | 48 | 0 | 0 | 0 | 0 | 0 | 0 |
|                  | 72 | 0 | 0 | 0 | 0 | 0 | 0 |
|                  | 96 | 0 | 0 | 0 | 0 | 0 | 0 |
| 5 $\mu$ M        | 14 | 0 | 0 | 0 | 0 | 0 | 0 |
|                  | 48 | 0 | 0 | 0 | 0 | 0 | 0 |
|                  | 72 | 0 | 0 | 0 | 0 | 0 | 0 |
|                  | 96 | 0 | 0 | 0 | 0 | 0 | 0 |
| <hr/>            |    |   |   |   |   |   |   |
| <b>Amide 14B</b> | 24 | 0 | 0 | 0 | 0 | 0 | 0 |
| 50 $\mu$ M       | 48 | 0 | 0 | 0 | 0 | 0 | 0 |
|                  | 72 | 0 | 0 | 0 | 0 | 0 | 0 |
|                  | 96 | 0 | 0 | 0 | 0 | 0 | 0 |
| 25 $\mu$ M       | 24 | 0 | 0 | 0 | 0 | 0 | 0 |
|                  | 48 | 0 | 0 | 0 | 0 | 0 | 0 |
|                  | 72 | 0 | 0 | 0 | 0 | 0 | 0 |
|                  | 96 | 0 | 0 | 0 | 0 | 0 | 0 |
| 10 $\mu$ M       | 24 | 0 | 0 | 0 | 0 | 0 | 0 |
|                  | 48 | 0 | 0 | 0 | 0 | 0 | 0 |
|                  | 72 | 0 | 0 | 0 | 0 | 0 | 0 |
|                  | 96 | 0 | 0 | 0 | 0 | 0 | 0 |
| 5 $\mu$ M        | 24 | 0 | 0 | 0 | 0 | 0 | 0 |
|                  | 48 | 0 | 0 | 0 | 0 | 0 | 0 |
|                  | 72 | 0 | 0 | 0 | 0 | 0 | 0 |
|                  | 96 | 0 | 0 | 0 | 0 | 0 | 0 |
| <hr/>            |    |   |   |   |   |   |   |
| <b>Amide 19A</b> | 24 | 0 | 0 | 0 | 0 | 0 | 0 |
| 50 $\mu$ M       | 48 | 0 | 0 | 0 | 0 | 0 | 0 |
|                  | 72 | 0 | 0 | 0 | 0 | 0 | 0 |
|                  | 96 | 0 | 0 | 0 | 0 | 0 | 0 |
| 25 $\mu$ M       | 24 | 0 | 0 | 0 | 0 | 0 | 0 |
| <hr/>            |    |   |   |   |   |   |   |

|            |    |   |   |   |   |   |   |
|------------|----|---|---|---|---|---|---|
|            | 48 | 0 | 0 | 0 | 0 | 0 | 0 |
|            | 72 | 0 | 0 | 0 | 0 | 0 | 0 |
|            | 96 | 0 | 0 | 0 | 0 | 0 | 0 |
| 10 $\mu$ M | 24 | 0 | 0 | 0 | 0 | 0 | 0 |
|            | 48 | 0 | 0 | 0 | 0 | 0 | 0 |
|            | 72 | 0 | 0 | 0 | 0 | 0 | 0 |
|            | 96 | 0 | 0 | 0 | 0 | 0 | 0 |
| 5 $\mu$ M  | 24 | 0 | 0 | 0 | 0 | 0 | 0 |
|            | 48 | 0 | 0 | 0 | 0 | 0 | 0 |
|            | 72 | 0 | 0 | 0 | 0 | 0 | 0 |
|            | 96 | 0 | 0 | 0 | 0 | 0 | 0 |

<sup>a</sup> Percentages relative to the 20 worms investigated.

<sup>b</sup> RPMI 1640.

The effect of the compounds on motor activity of adult *S. mansoni* was assessed qualitatively.

**Figure S1. Description of piplartine and its analogues.**

**Piplartine, IUPAC name:**

1-[(2E)-3-(3,4,5-trimethoxyphenyl)prop-2-enoyl]-1,2,5,6-tetrahydropyridin-2-one

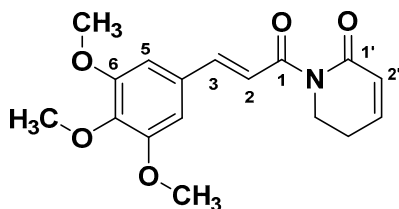

**RMN<sup>1</sup> H** (300 MHz; CDCl<sub>3</sub>):  $\delta$  7,68 (d;  $J=15,6$  Hz; 1H, H2) ; 7,43 (d;  $J=15,6$  Hz; 1H, H3); 6,95 (m, 1H, H2'); 6,81 (s, 2H, H5 e H9); 6,04 (dt;  $J=9,9$  e 1,8 Hz; 1H; H3'); 4,05 (t;  $J=6,5$  Hz; 2H; H5'); 3,89 (s, 6H; OMe 6 e 8); 3,88 (s; 3H; OMe 7); 2,50 (m; 2H, H4').

**RMN<sup>13</sup> C** (75 MHz; CDCl<sub>3</sub>):  $\delta$  168,70 (C1); 165,80 (C1'); 153,30 (C6, C8); 145,50 (C3'); 143,70 (C4); 139,90 (C7); 130,60 (C3); 125,70 (C2'); 121,00 (C2); 105,40 (C5, C9); 60,89 (OMe 7); 56,11 (OMe 6 e 8); 41,62 (C5'); 24,70 (C4').

**EMBR-  $m/z$**  (%): 317 (M<sup>+</sup>, 90), 289 (20), 274 (32), 221 (100), 205 (20), 190 (32), 177 (17).

**EMAR (IES)**: calculated to C<sub>17</sub>H<sub>20</sub>NO<sub>5</sub><sup>+</sup>[M+H]<sup>+</sup> = 318,1336; found = 318,1337.

**1G, IUPAC name:**

(2E)-1-(pyrrolidin-1-yl)-3-(3,4,5-trimethoxyphenyl)prop-2-en-1-one

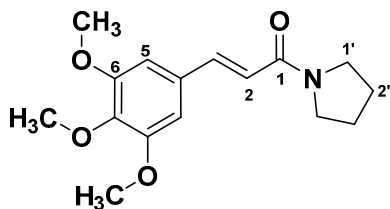

**RMN <sup>1</sup>H** (300 MHz; CDCl<sub>3</sub>): δ 7,62 (d; *J*=15,3 Hz; 1H; H3); 6,75 (s, 2H, H5, H9); 6,62 (d; *J*=15,3 Hz; 1H; H2); 3,89 (s, 6H; OMe 6 e 8); 3,87 (s, 3H, OMe 7); 3,65-3,60 (m, 4H, H1', H4'); 2,01 (m, 2H, H2'); 1,91 (m, 2H, H3').

**RMN <sup>13</sup>C** (75 MHz; CDCl<sub>3</sub>): δ 164,52 (C1); 153,25 (C6, C8); 141,64 (C3); 139,40 (C7); 130,80 (C4); 117,98 (C2); 104,95 (C5, C9); 60,82 (OMe 7); 56,07 (OMe 6 e 8); 46,51 (C1'); 45,96 (C4'); 26,02 (C2'); 24,23 (C3').

**EMAR (IES):** calculated to C<sub>16</sub>H<sub>22</sub>NO<sub>4</sub><sup>+</sup>[M+H]<sup>+</sup> = 292,1543; found = 292,1539 .

**1M, IUPAC name:**

1,3-dicyclohexyl-1-[(2E)-3-(3,4,5-trimethoxyphenyl)prop-2-enoyl]urea

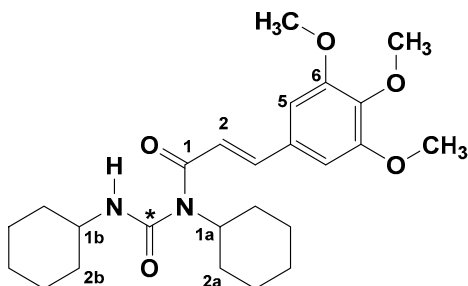

**RMN <sup>1</sup>H** (500 MHz; CDCl<sub>3</sub>): δ 7,57 (d; *J*=15,5 Hz; 1H; H2); 6,70 (s, 2H; H5, H9); 6,62 (d; *J*=15,5 Hz; 1H; H3); 4,16 (m, 1H, H1b); 3,88 (s, 6H; OMe 6 e 8); 3,86 (s, 3H, OMe 7), 3,76 (m, 1H, H1a); 2,02–1,82 (m, 8H, H2a, H2b, H6a, H6b), 1,41–1,15 (m, 12H; H3a, H3b, H4a, H4b, H5a, H5b).

**RMN <sup>13</sup>C** (100 MHz; CDCl<sub>3</sub>): δ 165,89 (C1); 154,05 (C\*); 153,35 (C6, C8); 143,08 (C3); 139,88 (C7); 130,18 (C4); 118,64 (C2); 105,02 (C5, C9); 60,90 (OMe 7); 55,99 (OMe 6 e 8); 55,49 (C1b); 49,98 (C1a); 34,87 (C2b); 33,90 (C6b); 32,77 (C2a); 30,86 (C6a); 26,15 (C3b, C5b); 25,37 (C3a); 25,34 (C5a); 24,67 (C4a, C4b).

**EMBR-*m/z*** (%): 319 (40), 236 (100), 222 (55), 221 (50), 207 (32), 194 (25), 190 (30), 180 (27), 163 (20), 133 (21), 121 (20), 98 (45), 77 (20), 68 (20), 55 (25).

**EMAR (IES):** calculated to C<sub>25</sub>H<sub>37</sub>N<sub>2</sub>O<sub>5</sub><sup>+</sup> [M+H]<sup>+</sup> = 445,2697; found = 445,2725.

**IV (KBr,  $\nu_{\text{max}}/\text{cm}^{-1}$ ):** 3291, 2997, 2931, 2854, 2249, 2118, 1761, 1703, 1650, 1583, 1330, 1129, 1006, 973, 892, 822.

**6B, IUPAC name:**

1,3-dicyclohexyl-1-[(2E)-3-(4-nitrophenyl)prop-2-enoyl]urea

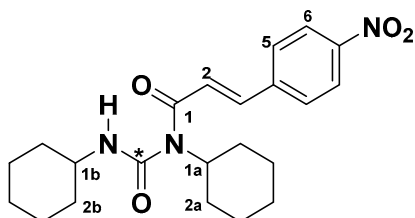

**RMN  $^1\text{H}$**  (300 MHz;  $\text{CDCl}_3$ ):  $\delta$  8,24 (d;  $J=9,0$  e 2,4 Hz; 2H, H6, H8); 7,69 (d;  $J=15,3$  Hz; 1H, H2); 7,62 (d;  $J=9,0$  e 2,1 Hz; 2H, H5, H9); 6,84 (d;  $J=15,3$  Hz; 1H, H3); 6,55 (sl, NH); 4,19–4,11 (m, 1H, H1b); 3,82–3,74 (m, 1H, H1a); 1,89–1,19 (m, 20H, H2a, H2b, H3a, H3b, H4a, H4b, H5a, H5b, H6a, H6b).

**RMN  $^{13}\text{C}$**  (75 MHz;  $\text{CDCl}_3$ ):  $\delta$  165,16 (C1); 153,66 (C\*); 148,28 (C7); 140,92 (C4); 140,23 (C3); 128,41 (C5, C9); 124,19 (C6, C8); 123,61 (C2); 55,73 (C1a); 50,05 (C1b); 34,89 (C2a, C6a); 32,78 (C2b); 31,00 (C6b); 26,16 (C3a); 25,42 (C3b); 25,35 (C4a); 25,30 (C4b); 24,66 (C5a, C5b).

**EMAR (IES):** calculated to  $\text{C}_{22}\text{H}_{30}\text{N}_3\text{O}_4^+$ :  $[\text{M}+\text{H}]^+ = 400,2231$ ; found = 400,2236.

**14B, IUPAC name:**

(2E)-3-(2H-1,3-benzodioxol-5-yl)-1-(pyrrolidin-1-yl)prop-2-en-1-one

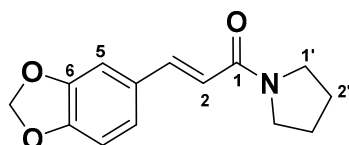

**RMN  $^1\text{H}$**  (300 MHz;  $\text{CDCl}_3$ ):  $\delta$  7,61 (d;  $J=15,3$  Hz; 1H, H3); 7,04 (d;  $J=1,5$  Hz; 1H, H5); 7,02–6,99 (dd;  $J=8,4$  e 1,8 Hz; 1H, H9); 6,80 (d;  $J=8,1$  Hz; 1H, H8); 6,56 (d;  $J=15,3$  Hz; 1H, H2); 5,99 (s, 2H,  $\text{OCH}_2\text{O}$ ); 3,63–3,56 (m, 4H, H1', H4') 2,04–1,98 (m; 2H, H2'); 1,94–1,87 (m, 2H, H3').

**RMN  $^{13}\text{C}$**  (75 MHz;  $\text{CDCl}_3$ ):  $\delta$  164,76 (C1); 148,84 (C6); 148,10 (C7); 141,30 (C3); 129,68 (C4); 123,75 (C9); 116,82 (C2); 108,41 (C8); 106,32 (C5); 101,32 ( $\text{OCH}_2\text{O}$ ); 46,47 (C1'); 45,95 (C4'); 26,07 (C2'); 24,28 (C3').

**EMAR (IES):** calculated to  $\text{C}_{14}\text{H}_{16}\text{NO}_3^+$ :  $[\text{M}+\text{H}]^+ = 246,1125$ ; found = 246,1130.

**19A IUPAC name:**

Butyl (2E,4E)-5-(3,4,5-trimethoxyphenyl)penta-2,4-dienoate

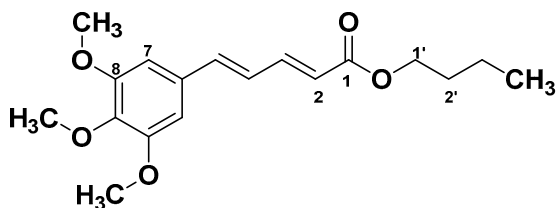

**RMN <sup>1</sup>H** (300 MHz; CDCl<sub>3</sub>): δ 7,42 (qd; *J*=15,5 e 8,9 Hz; 1H, H3); 6,81 (sl, 1H, H5); 6,78 (sl, 1H, H4); 6,69 (s, 2H, H7, H11); 5,99 (d; *J*=15,3 Hz; 1H, H2); 4,18 (*t*, *J*=6,8 Hz; 2H, H1'); 3,90 (s, 6H; OMe 8, 10); 3,87 (s, 3H; OMe 9); 1,72-1,63 (m, 2H, H2'); 1,49–1,39 (m, 2H, H3'); 0,96 (*t*, *J*=7,4 Hz; 3H, H4').

**RMN <sup>13</sup>C** (75 MHz; CDCl<sub>3</sub>): δ 167,11 (C1); 153,37 (C8, C10); 144,30 (C3); 140,21 (C5); 139,10 (C9); 131,62 (C2); 125,64 (C6); 121,03 (C4); 104,26 (C7, C11); 64,22 (C1'); 60,91 (OMe 9); 56,10 (OMe 8, 10); 30,73 (C2'); 19,15 (C3'); 13,70 (C4').

**EMBR-*m/z*** (%): 320 (25), 219 (100), 204 (30), 188 (55).

**EMAR (IES):** calculated to C<sub>18</sub>H<sub>24</sub>NaO<sup>+</sup>[M+Na]<sup>+</sup> = 343,1516; found = 343,1513.

**IV (KBr, *v*<sub>max</sub>/cm<sup>-1</sup>):** 3445, 3005, 2960, 2897, 2838, 1703, 1624, 1579, 1506, 1467, 1419, 1357, 1253, 1244, 1142, 998, 850, 744, 724.

**Figure S2.** Original data from mouse BALB/cN macrophage (J774A.1) cell line analyzed by flow cytometry (10.000 events/sample) to evaluate the cell death mechanism mediated by piplartine and analogues 1G 1M, 6B, 14B and 19A, following treatment for 24 h at 25, 100 and 400  $\mu\text{g}/\text{mL}$  concentrations using Annexin-V FITC (apoptosis marker) and Propidium Iodide (PI, necrosis marker) staining. The controls DMEM, DMSO and  $\text{H}_2\text{O}_2$  (peroxido) were used as comparisons parameters.

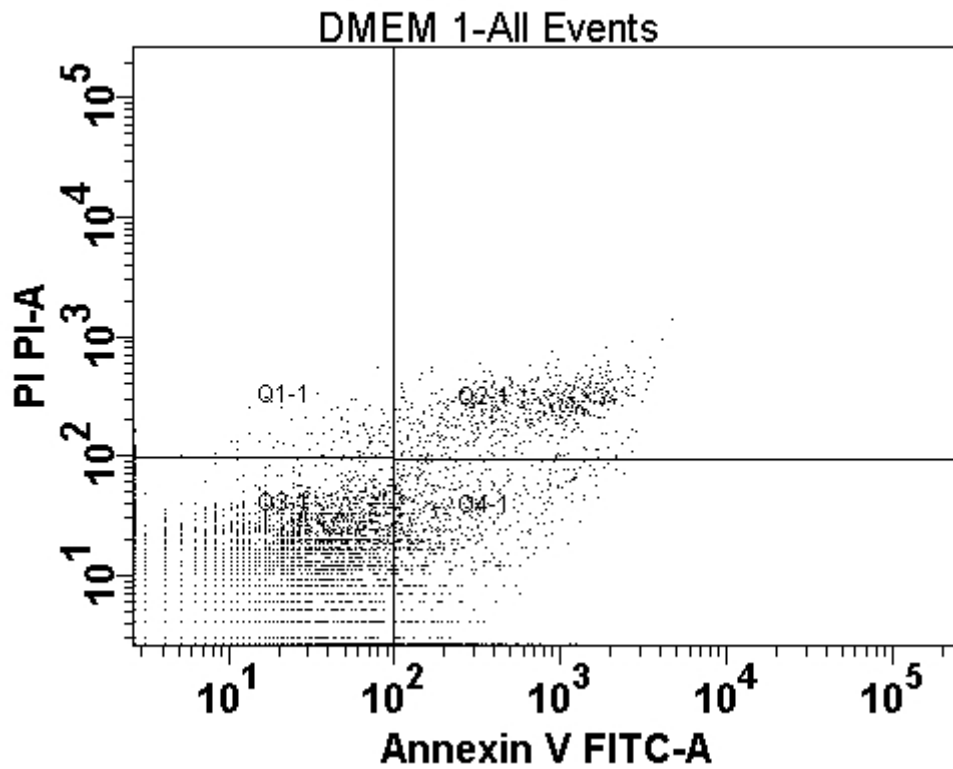



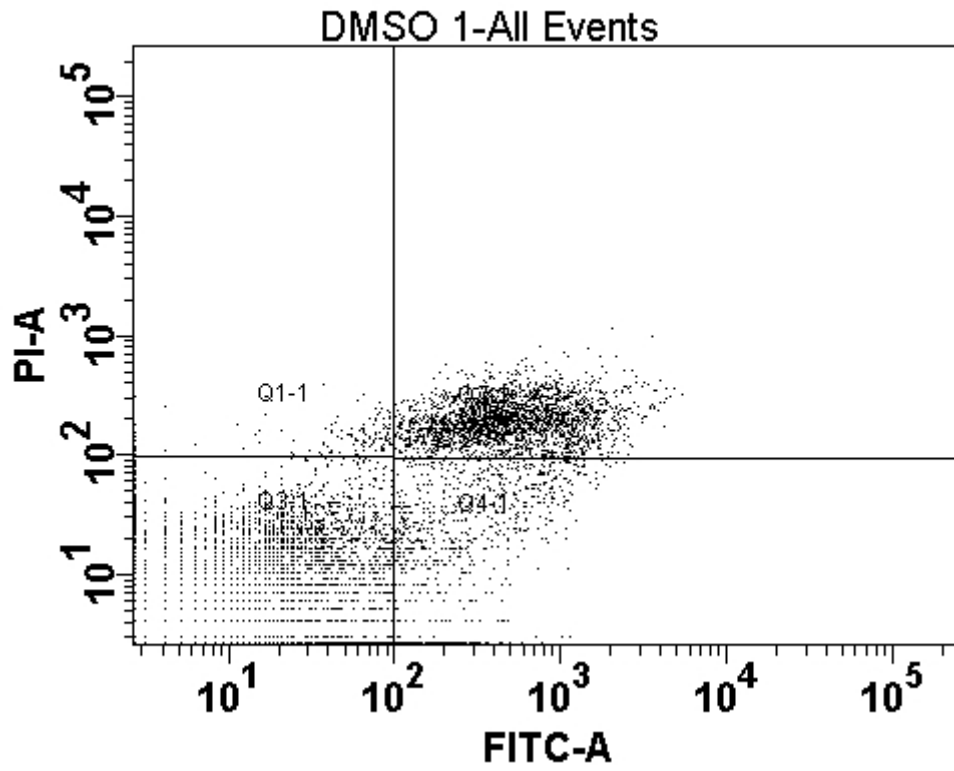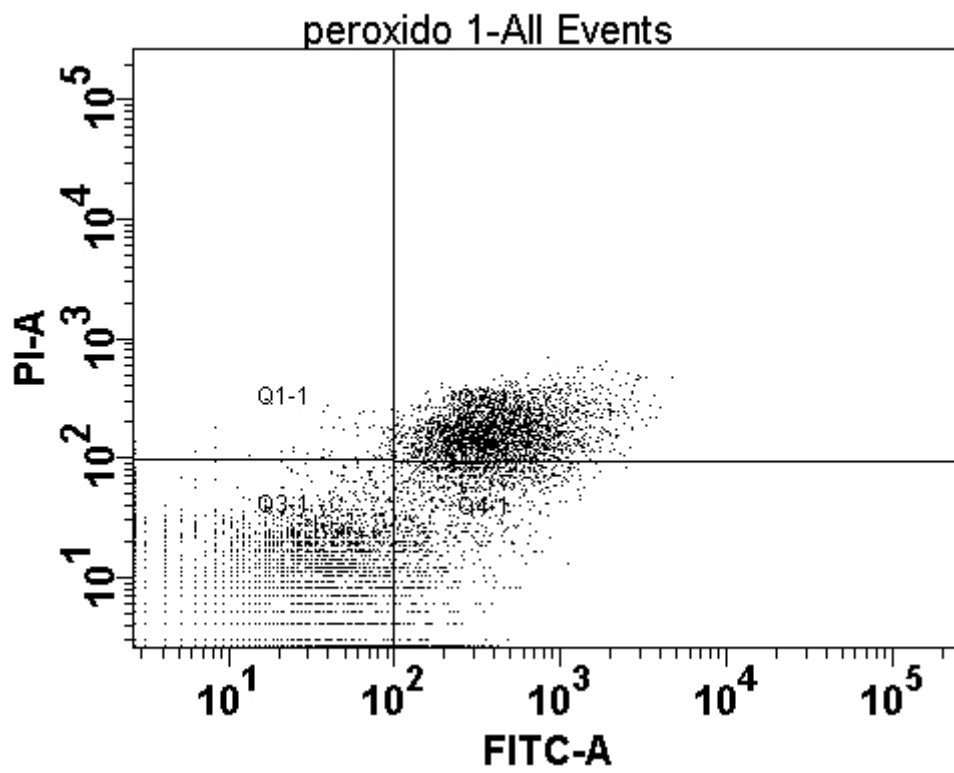

PPT 25-1-All Events

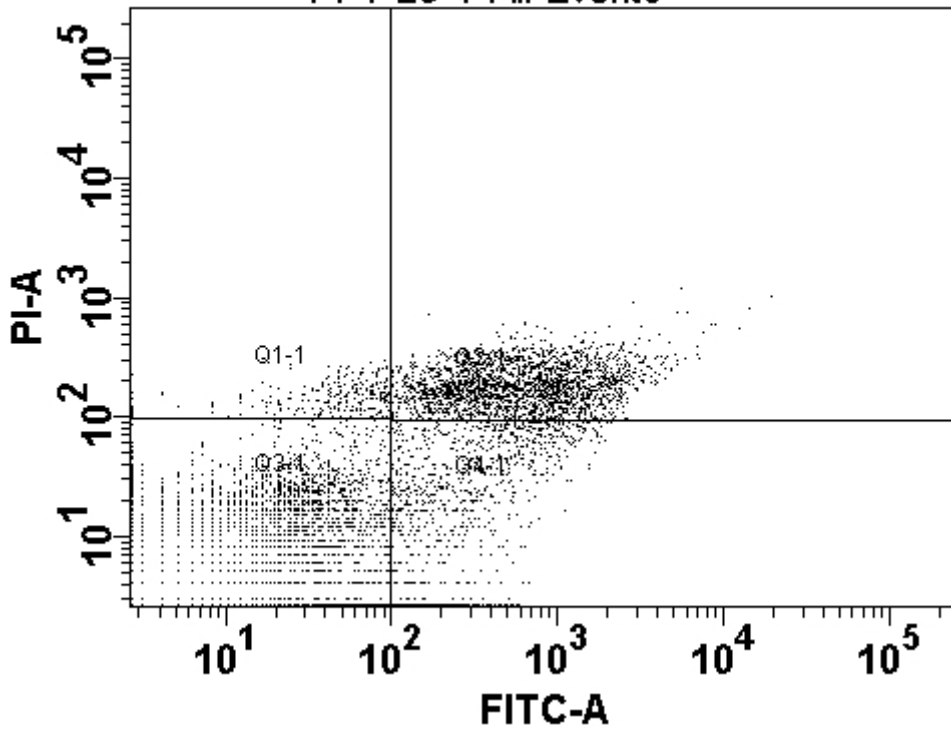

PPT 100-1-All Events

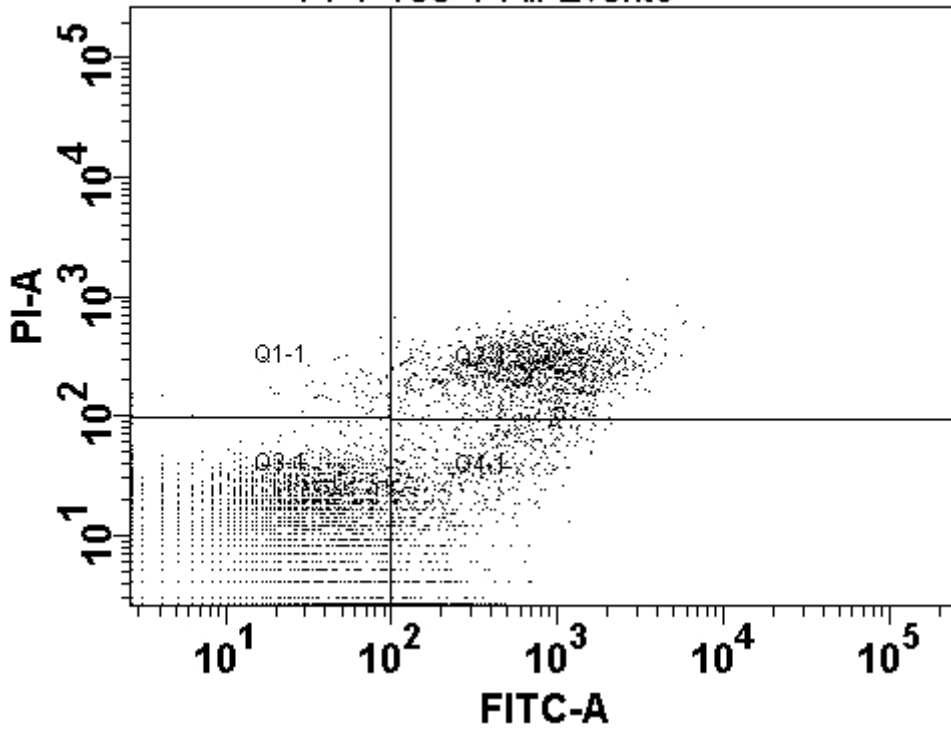

PPT 400-1-All Events

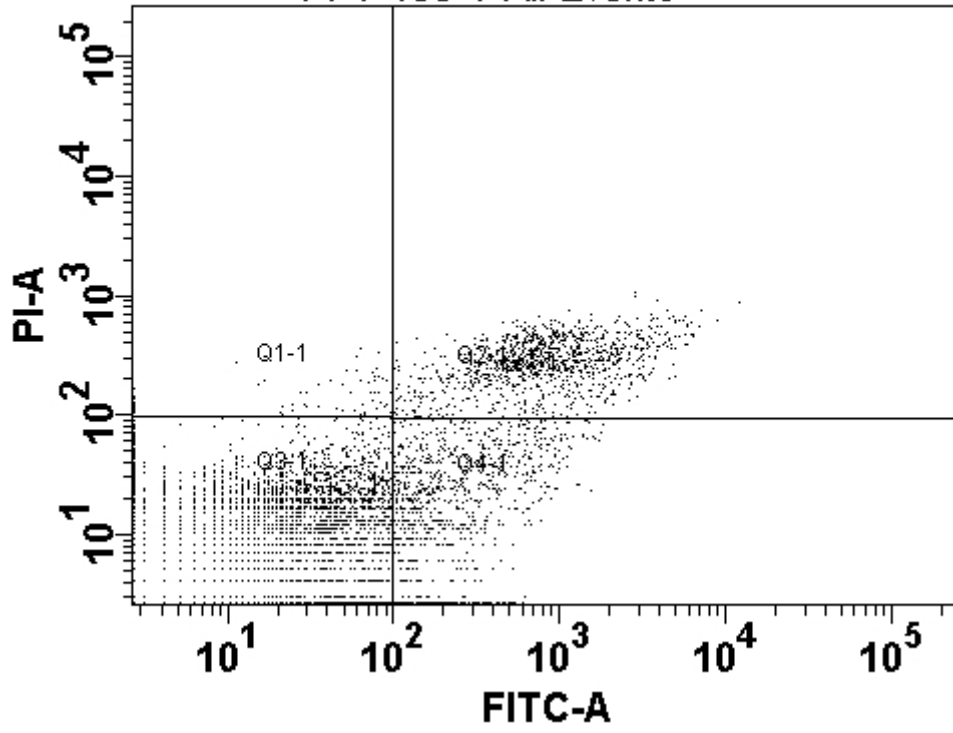

1G 25 -1-All Events

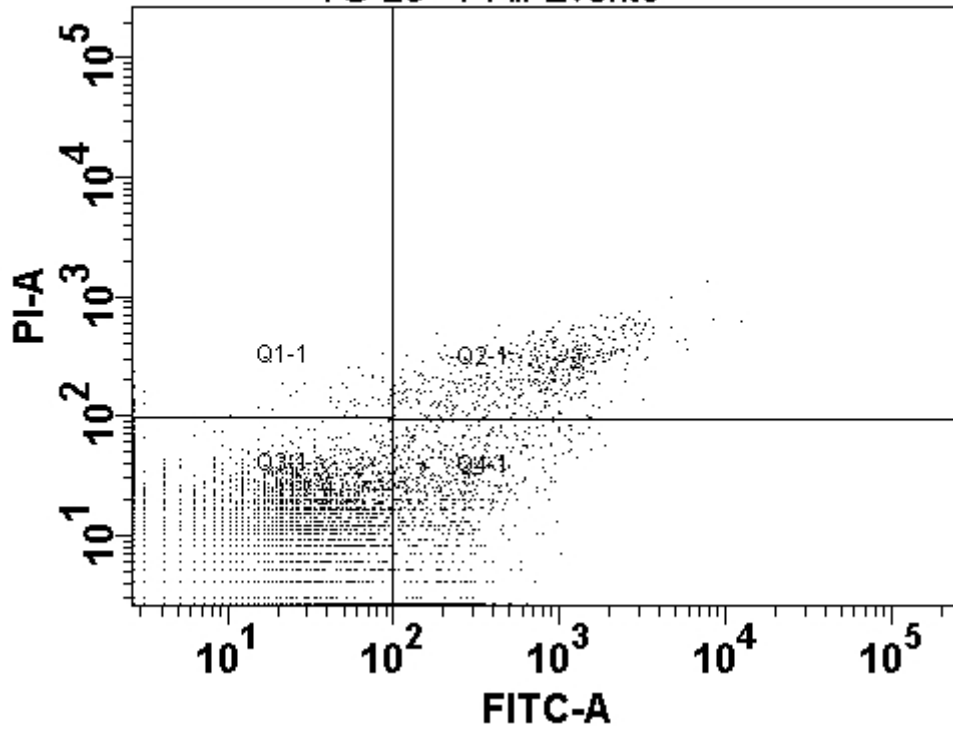

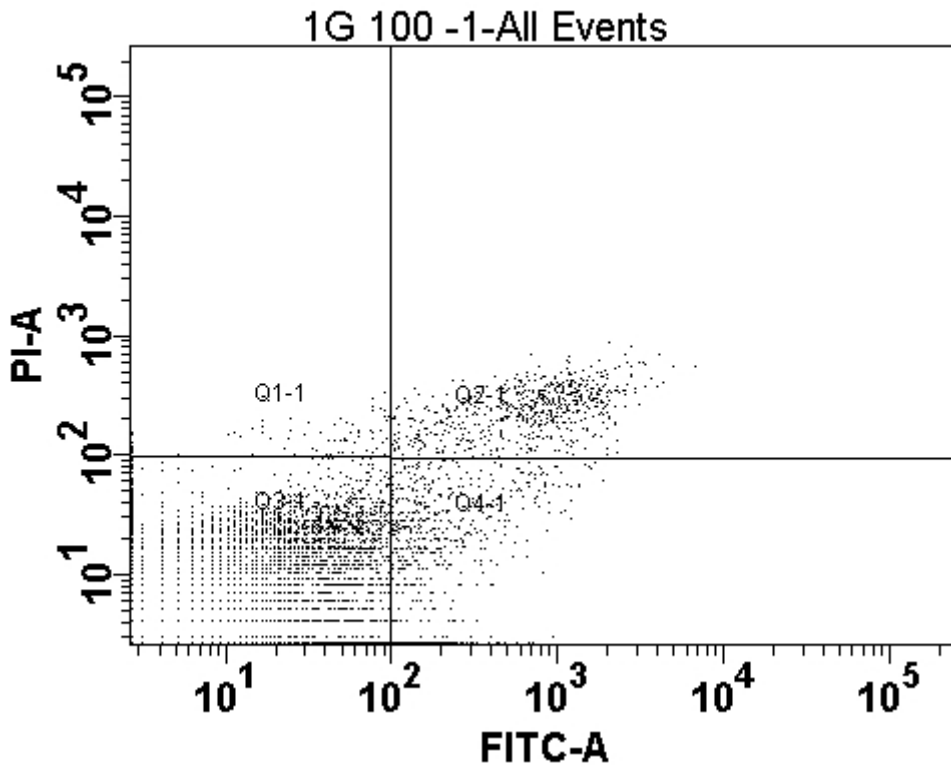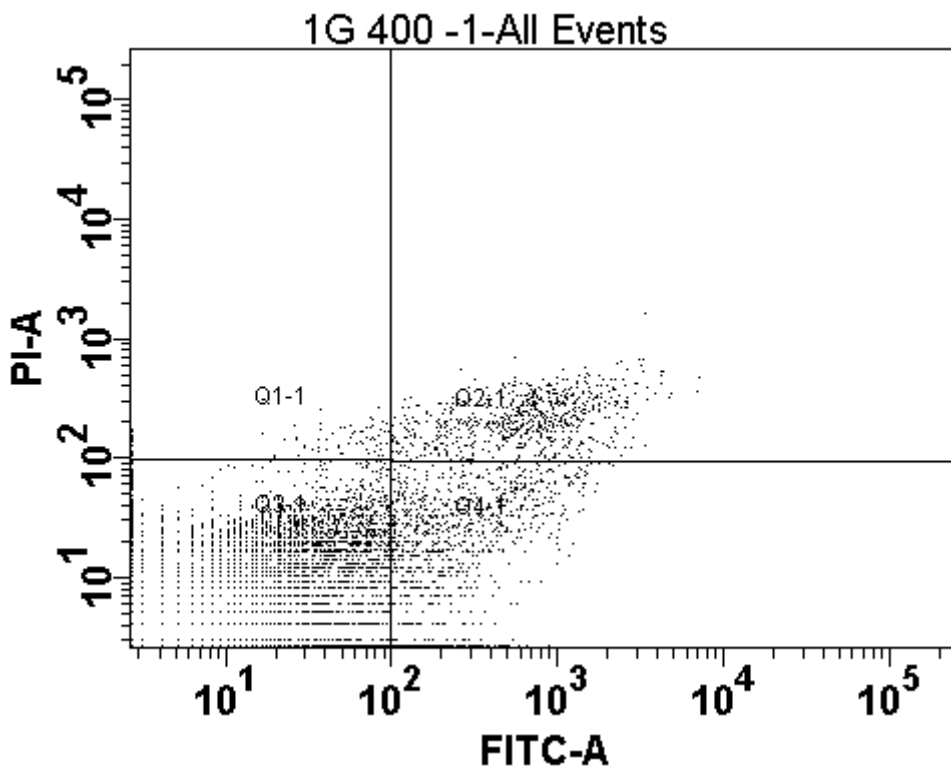

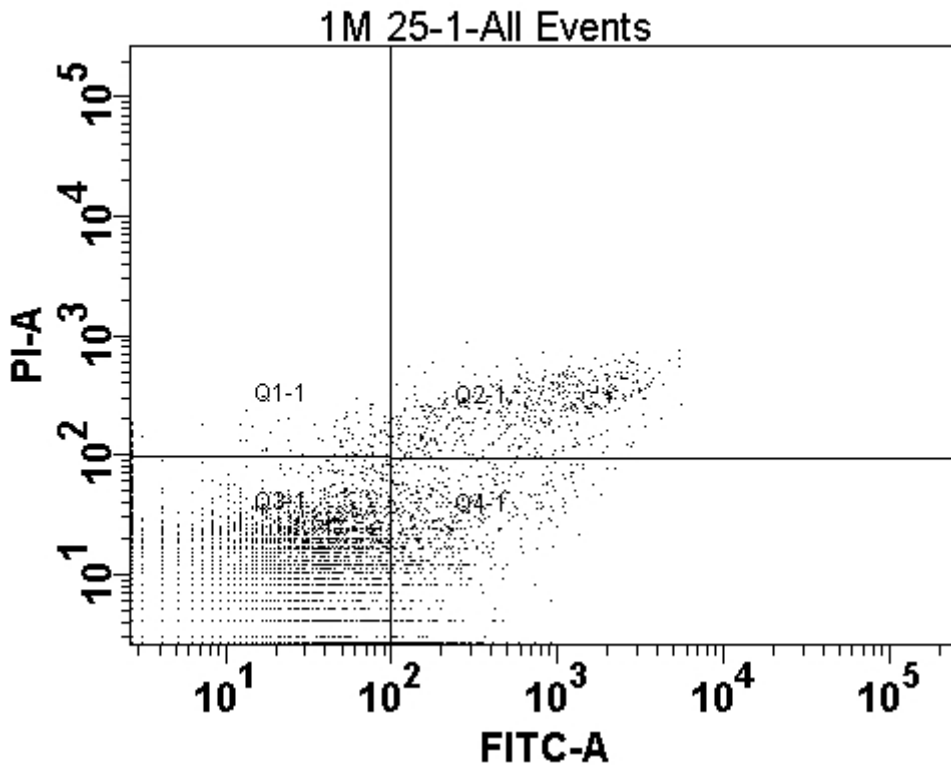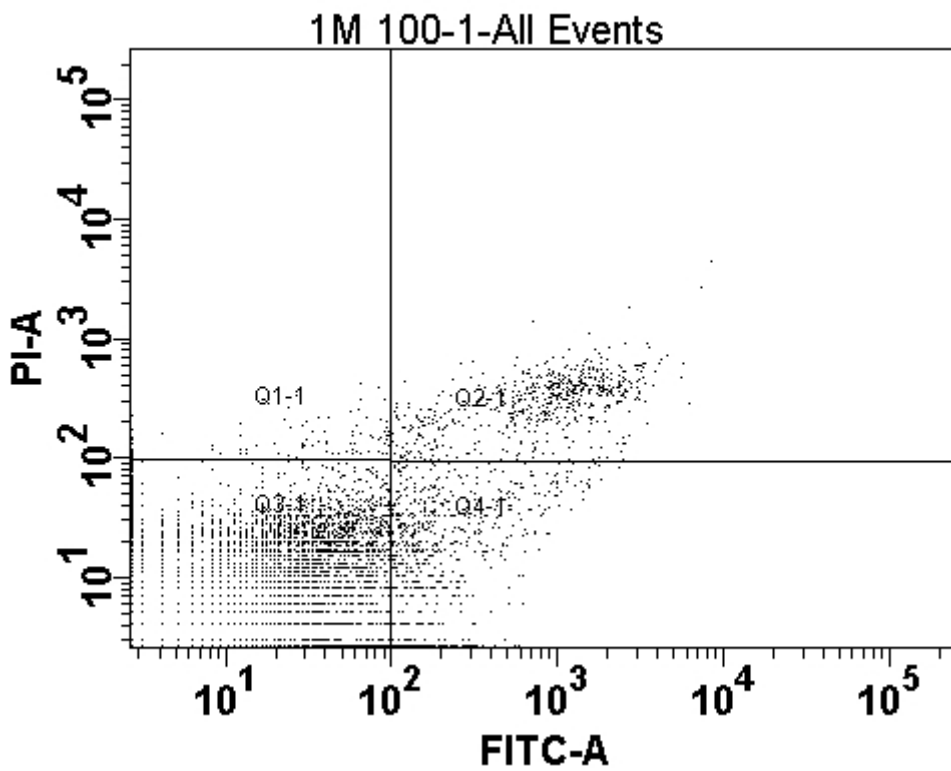

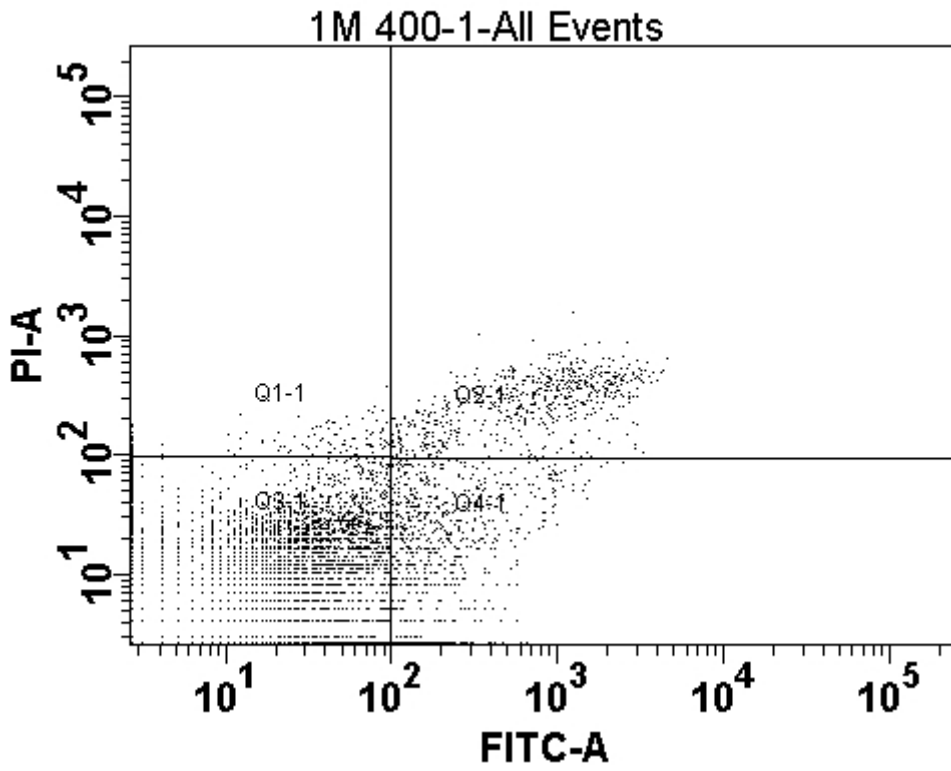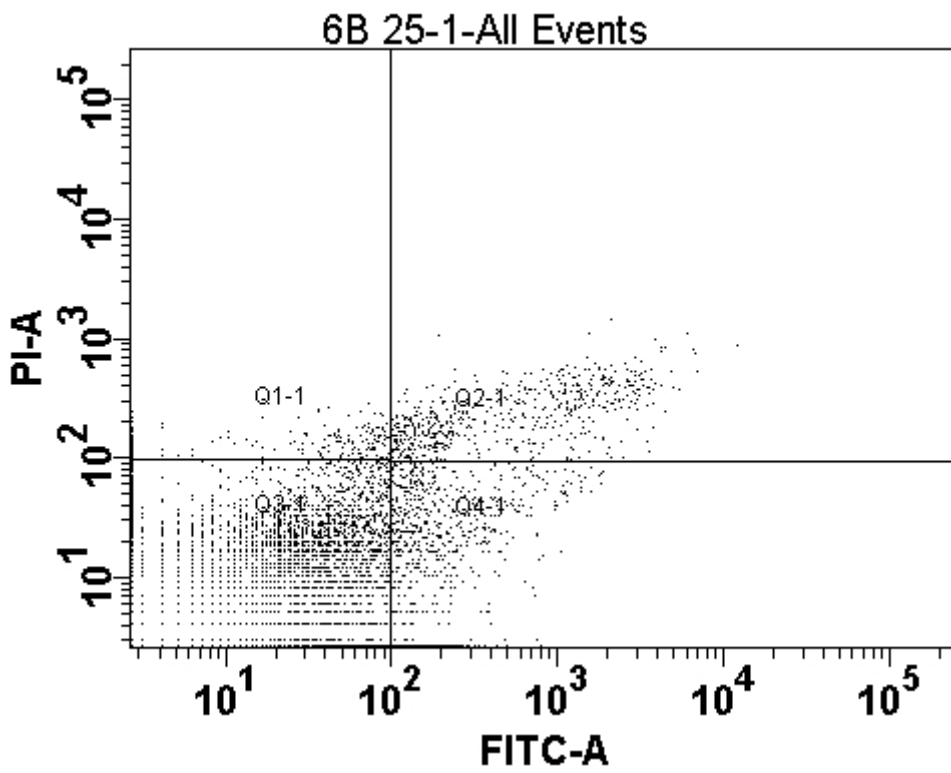

6B 100-1-All Events

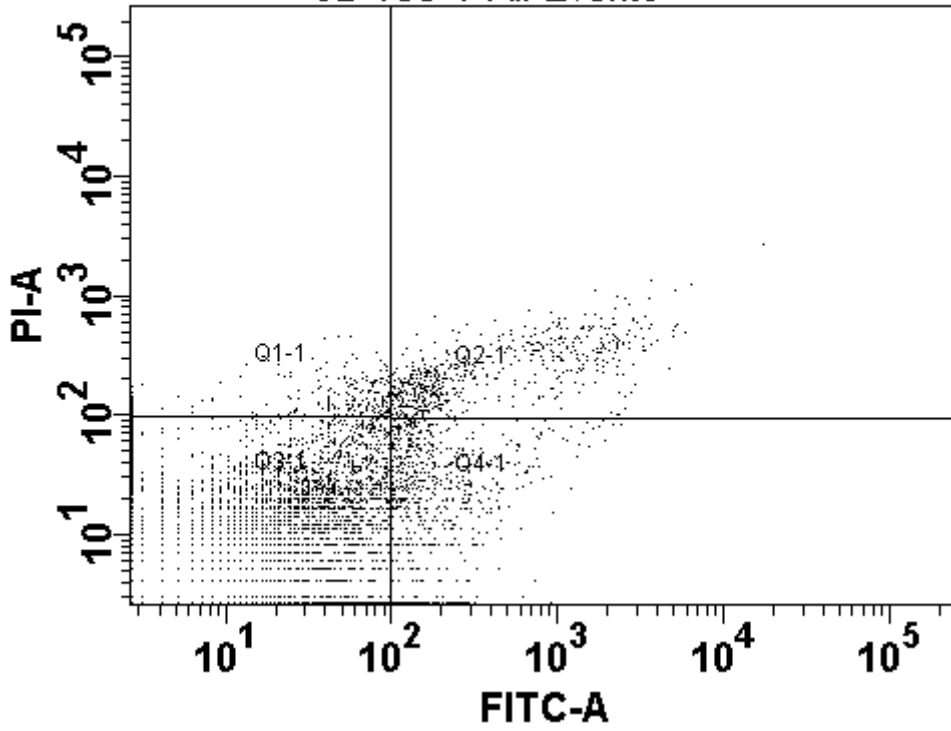

6B 400-1-All Events

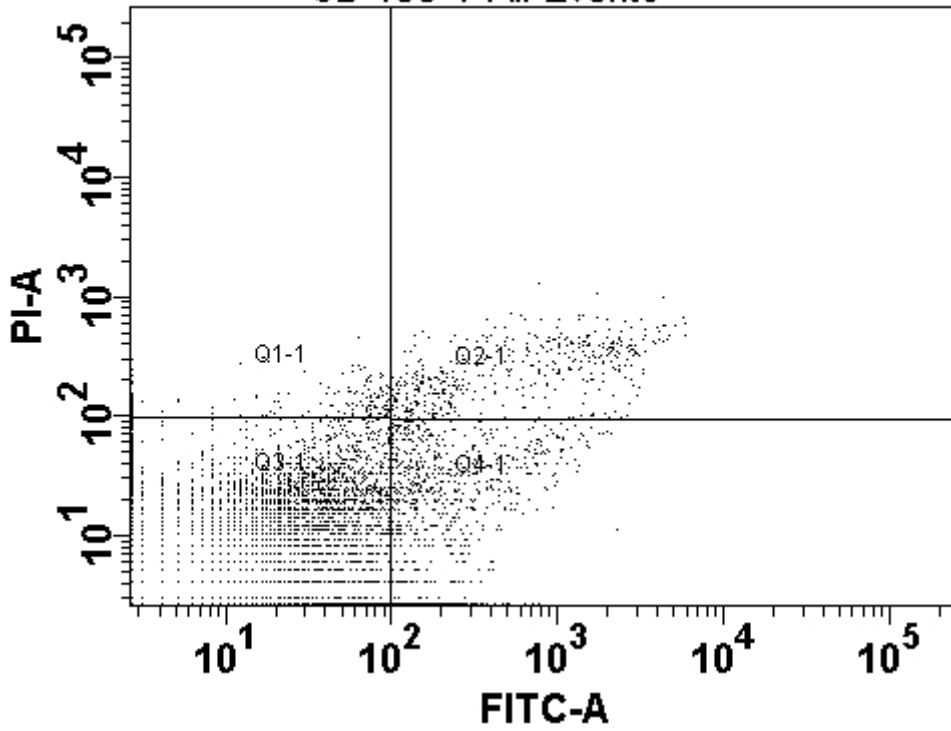

14B 25-1-All Events

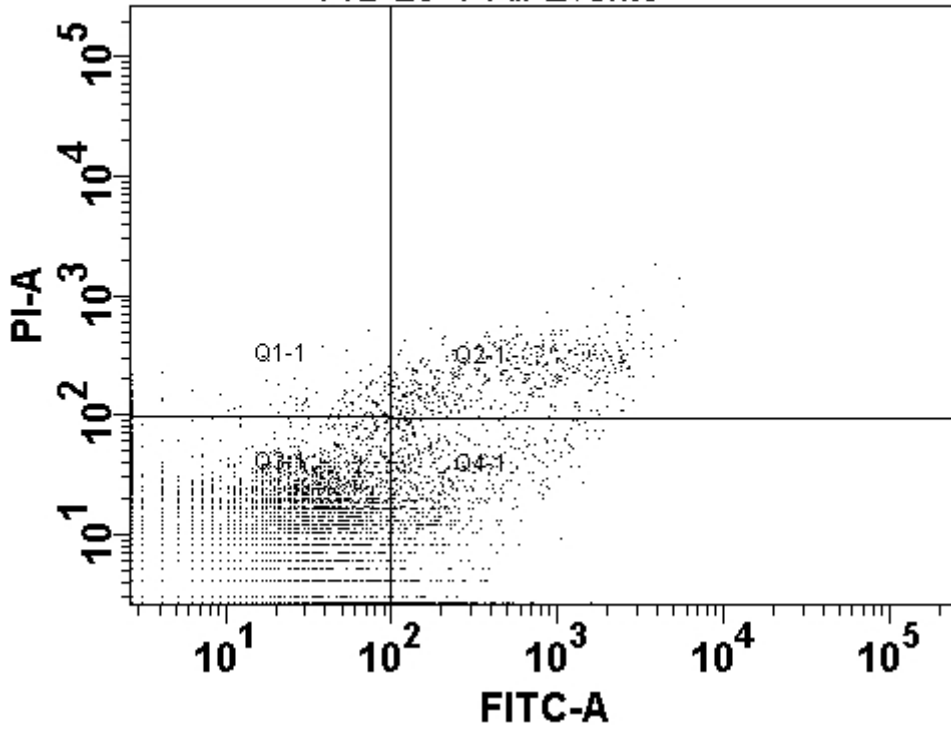

14B 100-1-All Events

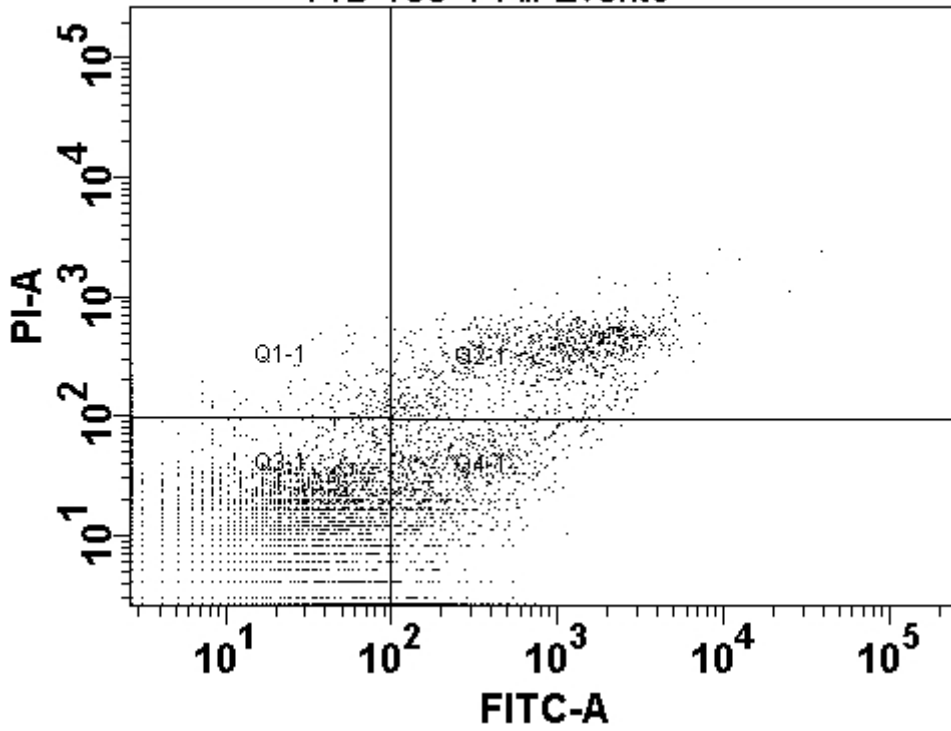



14B 400-1-All Events

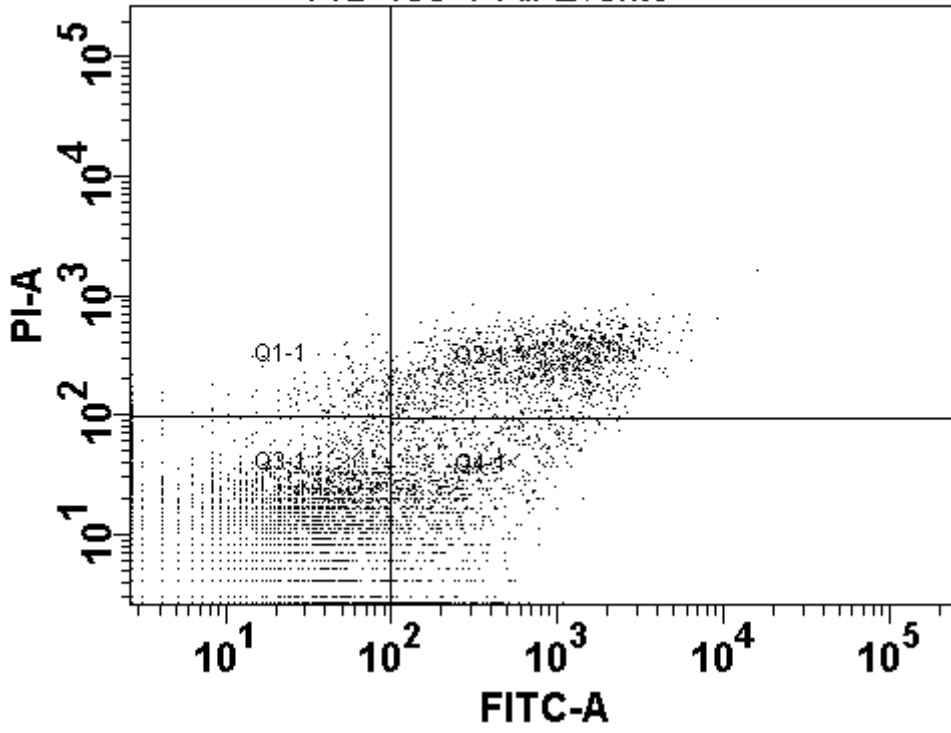

19A 25-1-All Events

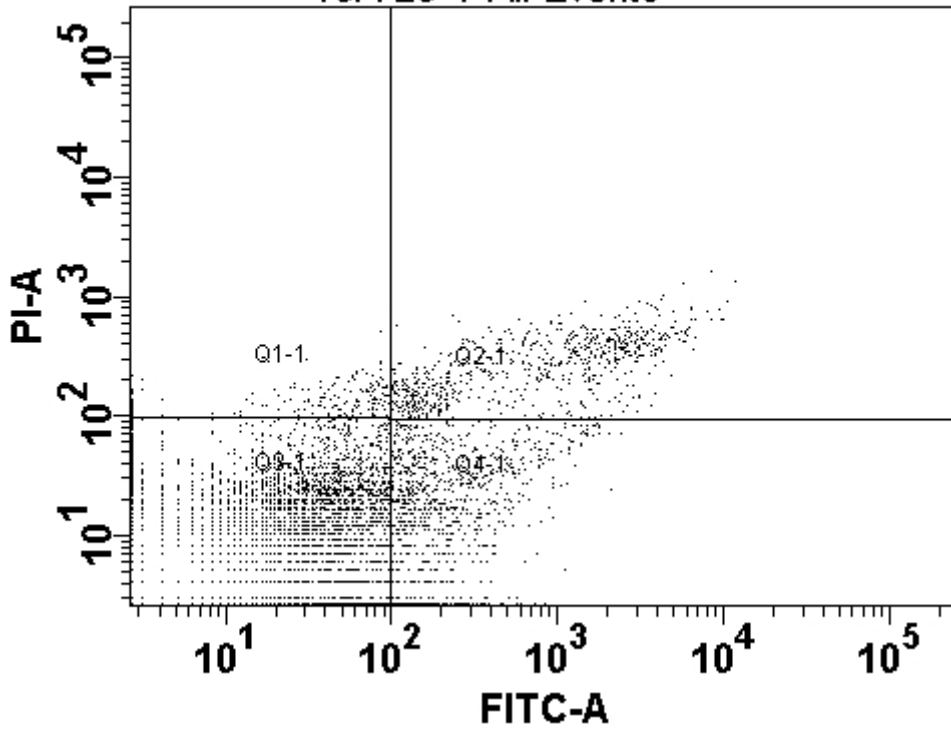

19A 100-1-All Events

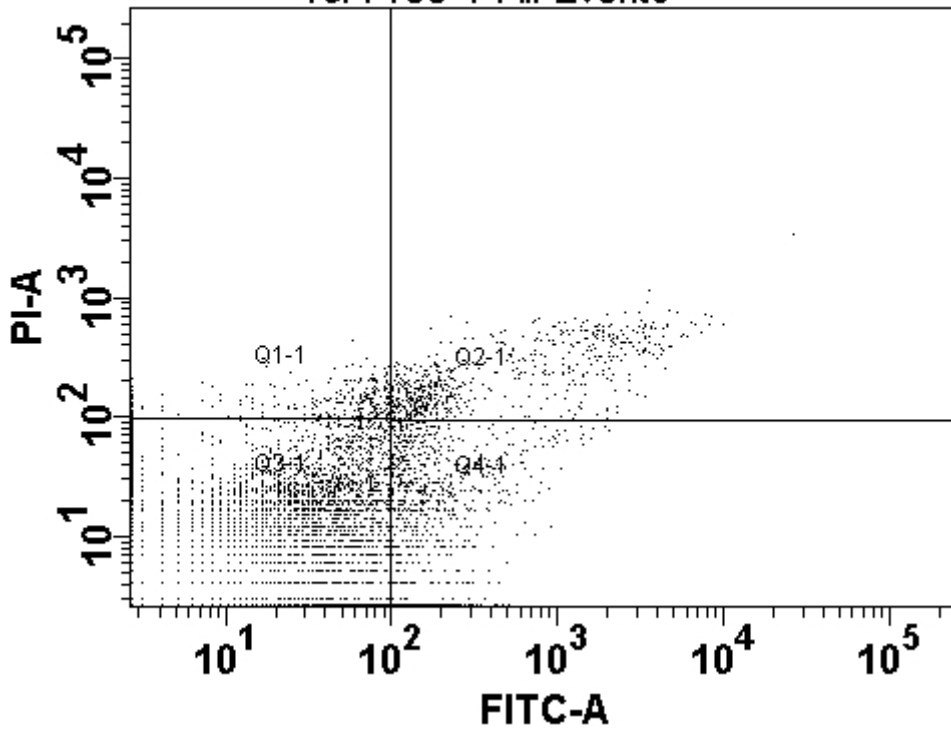

19A 400-1-All Events

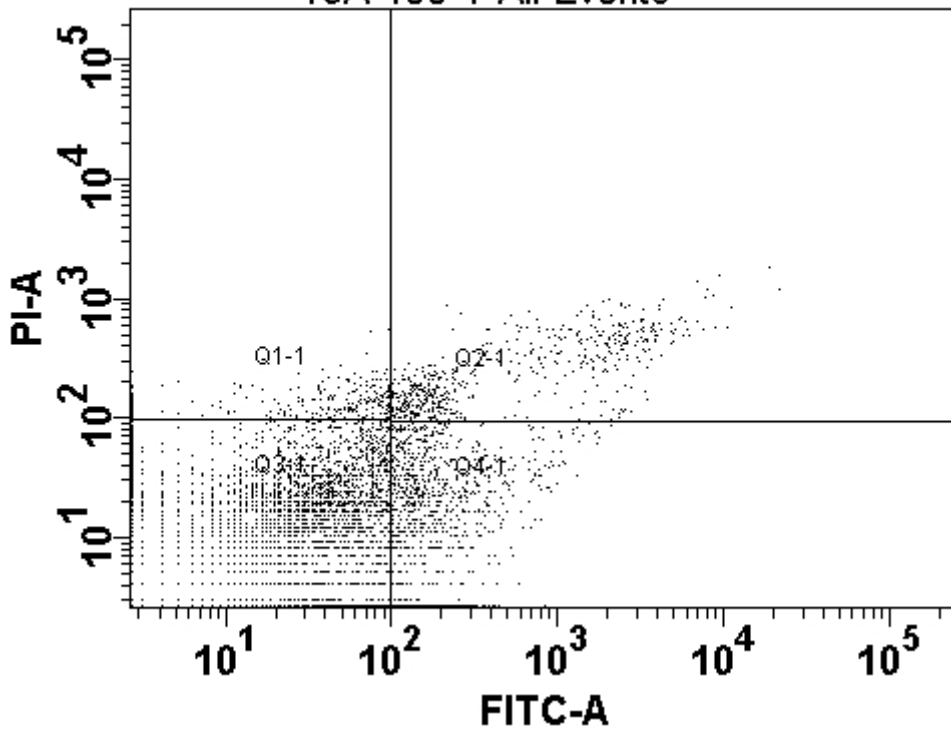

Supplement: ijms-19-01802-s001.pdf [file ijms-19-01802-s001.pdf]
