# Supplementary material for: Structure–Activity Relationship of Piplartine and Synthetic Analogues against Schistosoma mansoni and Cytotoxicity to Mammalian Cells
Source: MDPI journal article supplement (doi:10.3390/ijms19061802), 2018-06-19
Supplement: s2 [file s2]

Archive with 31 entries (30 files):
- Definitions/
- Definitions/ijms-logo-eps-converted-to.pdf
- Definitions/ijms-logo.eps
- Definitions/journalnames.tex
- Definitions/logo-ccby-eps-converted-to.pdf
- Definitions/logo-ccby.eps
- Definitions/logo-mdpi-eps-converted-to.pdf
- Definitions/logo-mdpi.eps
- Definitions/logo-updates.pdf
- Definitions/mdpi.cls
- Definitions/unicode.aux
- Definitions/unicode.tex
- ijms-262949-g001.pdf
- ijms-262949-g002.pdf
- ijms-262949-g003.pdf
- ijms-262949-g004.pdf
- ijms-262949-g005.pdf
- ijms-262949.aux
- ijms-262949.log
- ijms-262949.out
- ijms-262949.synctex.gz
- ijms-262949.tex
- ijms-logo-eps-converted-to.pdf
- ijms-logo.eps
- logo-ccby-eps-converted-to.pdf
- logo-ccby.eps
- logo-mdpi-eps-converted-to.pdf
- logo-mdpi.eps
- mdpi.cls
- unicode.aux
- unicode.tex
