# Supplementary material for: Structure–Activity Relationship of Piplartine and Synthetic Analogues against Schistosoma mansoni and Cytotoxicity to Mammalian Cells
Source: MDPI journal article supplement (doi:10.3390/ijms19061802), 2018-06-19
Supplement: s2 [file s2 › Definitions/logo-mdpi-eps-converted-to.pdf]

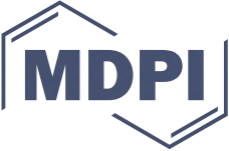A dark blue outline of a house, consisting of a triangular roof and a rectangular base. The letters 'MDPI' are centered within the house shape.

**MDPI**
