# Supplementary material for: Structure–Activity Relationship of Piplartine and Synthetic Analogues against Schistosoma mansoni and Cytotoxicity to Mammalian Cells
Source: MDPI journal article supplement (doi:10.3390/ijms19061802), 2018-06-19
Supplement: s2 [file s2 › Definitions/unicode.aux]

\relax 
\providecommand\hyper@newdestlabel[2]{}
\@setckpt{Definitions/unicode}{
\setcounter{page}{1}
\setcounter{equation}{0}
\setcounter{enumi}{0}
\setcounter{enumii}{0}
\setcounter{enumiii}{0}
\setcounter{enumiv}{0}
\setcounter{footnote}{0}
\setcounter{mpfootnote}{0}
\setcounter{part}{0}
\setcounter{section}{0}
\setcounter{subsection}{0}
\setcounter{subsubsection}{0}
\setcounter{paragraph}{0}
\setcounter{subparagraph}{0}
\setcounter{figure}{0}
\setcounter{table}{0}
\setcounter{linenumber}{1}
\setcounter{LN@truepage}{0}
\setcounter{float@type}{32}
\setcounter{parentequation}{0}
\setcounter{theorem}{0}
\setcounter{lemma}{0}
\setcounter{corollary}{0}
\setcounter{proposition}{0}
\setcounter{characterization}{0}
\setcounter{property}{0}
\setcounter{problem}{0}
\setcounter{example}{0}
\setcounter{examplesanddefinitions}{0}
\setcounter{remark}{0}
\setcounter{definition}{0}
\setcounter{hypothesis}{0}
\setcounter{notation}{0}
\setcounter{NAT@ctr}{0}
\setcounter{Item}{0}
\setcounter{bookmark@seq@number}{0}
\setcounter{pp@next@reset}{0}
\setcounter{boxenv}{0}
\setcounter{chart}{0}
\setcounter{scheme}{0}
\setcounter{ContinuedFloat}{0}
}
