# Supplementary material for: Structure–Activity Relationship of Piplartine and Synthetic Analogues against Schistosoma mansoni and Cytotoxicity to Mammalian Cells
Source: MDPI journal article supplement (doi:10.3390/ijms19061802), 2018-06-19
Supplement: s2 [file s2 › ijms-262949.aux]

\relax 
\providecommand\hyper@newdestlabel[2]{}
\bibstyle{Definitions/mdpi}
\providecommand\HyperFirstAtBeginDocument{\AtBeginDocument}
\HyperFirstAtBeginDocument{\ifx\hyper@anchor\@undefined
\global\let\oldcontentsline\contentsline
\gdef\contentsline#1#2#3#4{\oldcontentsline{#1}{#2}{#3}}
\global\let\oldnewlabel\newlabel
\gdef\newlabel#1#2{\newlabelxx{#1}#2}
\gdef\newlabelxx#1#2#3#4#5#6{\oldnewlabel{#1}{{#2}{#3}}}
\AtEndDocument{\ifx\hyper@anchor\@undefined
\let\contentsline\oldcontentsline
\let\newlabel\oldnewlabel
\fi}
\fi}
\global\let\hyper@last\relax 
\gdef\HyperFirstAtBeginDocument#1{#1}
\providecommand\HyField@AuxAddToFields[1]{}
\providecommand\HyField@AuxAddToCoFields[2]{}
\catcode `"\active 
\select@language{english}
\@writefile{toc}{\select@language{english}}
\@writefile{lof}{\select@language{english}}
\@writefile{lot}{\select@language{english}}
\select@language{english}
\@writefile{toc}{\select@language{english}}
\@writefile{lof}{\select@language{english}}
\@writefile{lot}{\select@language{english}}
\citation{B1-ijms-262949}
\citation{B2-ijms-262949}
\citation{B3-ijms-262949}
\citation{B4-ijms-262949}
\citation{B5-ijms-262949}
\citation{B6-ijms-262949}
\citation{B7-ijms-262949,B8-ijms-262949,B9-ijms-262949,B10-ijms-262949,B11-ijms-262949}
\citation{B12-ijms-262949}
\citation{B13-ijms-262949}
\citation{B14-ijms-262949}
\citation{B15-ijms-262949,B16-ijms-262949}
\citation{B17-ijms-262949,B18-ijms-262949}
\newlabel{sect:sec1-ijms-262949}{{1}{2}{Introduction \label {sect:sec1-ijms-262949}}{section.1}{}}
\newlabel{sect:sec1-ijms-262949@cref}{{[section][1][]1}{2}}
\@writefile{toc}{\contentsline {section}{\numberline {1}Introduction }{2}{section.1}}
\citation{B19-ijms-262949}
\newlabel{sect:sec2-ijms-262949}{{2}{3}{Results \label {sect:sec2-ijms-262949}}{section.2}{}}
\newlabel{sect:sec2-ijms-262949@cref}{{[section][2][]2}{3}}
\@writefile{toc}{\contentsline {section}{\numberline {2}Results }{3}{section.2}}
\newlabel{sect:sec2dot1-ijms-262949}{{2.1}{3}{Theoretical Calculations and Ultraviolet--Visible Absorption Spectra \label {sect:sec2dot1-ijms-262949}}{subsection.2.1}{}}
\newlabel{sect:sec2dot1-ijms-262949@cref}{{[subsection][1][2]2.1}{3}}
\@writefile{toc}{\contentsline {subsection}{\numberline {2.1}Theoretical Calculations and Ultraviolet--Visible Absorption Spectra }{3}{subsection.2.1}}
\@writefile{lof}{\contentsline {figure}{\numberline {1}{\ignorespaces Electron density: (\textbf  {\relax \mathversion  {bold}{a}}) piplartine; (\textbf  {\relax \mathversion  {bold}{b}}) 19A; (\textbf  {\relax \mathversion  {bold}{c}}) 1G; (\textbf  {\relax \mathversion  {bold}{d}}) 14B; (\textbf  {\relax \mathversion  {bold}{e}}) 6B and (\textbf  {\relax \mathversion  {bold}{f}}) 1M. \textls  [-15]{The colours represent negative (red) and positive (blue). The dipole moments of all compounds in debye values are as follows: piplartine: 5.4728337; 1G: 1.9658996; 1M: 4.4568136; 6B: 4.0062111; 14B: 3.9403826; 19A: 3.7385640.}\relax }}{3}{figure.1}}
\providecommand*\caption@xref[2]{\@setref\relax\@undefined{#1}}
\newlabel{fig:ijms-262949-f001}{{1}{3}{Electron density: (\textbf {\boldmath {a}}) piplartine; (\textbf {\boldmath {b}}) 19A; (\textbf {\boldmath {c}}) 1G; (\textbf {\boldmath {d}}) 14B; (\textbf {\boldmath {e}}) 6B and (\textbf {\boldmath {f}}) 1M. \textls [-15]{The colours represent negative (red) and positive (blue). The dipole moments of all compounds in debye values are as follows: piplartine: 5.4728337; 1G: 1.9658996; 1M: 4.4568136; 6B: 4.0062111; 14B: 3.9403826; 19A: 3.7385640.}\relax }{figure.1}{}}
\newlabel{fig:ijms-262949-f001@cref}{{[figure][1][]1}{3}}
\@writefile{lof}{\contentsline {figure}{\numberline {2}{\ignorespaces Ultraviolet and visible light absorption spectra of piplartine and its analogues in arbitrary units (A.U.).\relax }}{3}{figure.2}}
\newlabel{fig:ijms-262949-f002}{{2}{3}{Ultraviolet and visible light absorption spectra of piplartine and its analogues in arbitrary units (A.U.).\relax }{figure.2}{}}
\newlabel{fig:ijms-262949-f002@cref}{{[figure][2][]2}{3}}
\newlabel{sect:sec2dot2-ijms-262949}{{2.2}{4}{In Silico Studies Information \label {sect:sec2dot2-ijms-262949}}{subsection.2.2}{}}
\newlabel{sect:sec2dot2-ijms-262949@cref}{{[subsection][2][2]2.2}{4}}
\@writefile{toc}{\contentsline {subsection}{\numberline {2.2}In Silico Studies Information }{4}{subsection.2.2}}
\@writefile{lot}{\contentsline {table}{\numberline {1}{\ignorespaces Basic, geometric, structural, and solubility parameters of the parent and analogue~compounds.\relax }}{4}{table.1}}
\newlabel{tabref:ijms-262949-t001}{{1}{4}{Basic, geometric, structural, and solubility parameters of the parent and analogue~compounds.\relax }{table.1}{}}
\newlabel{tabref:ijms-262949-t001@cref}{{[table][1][]1}{4}}
\@writefile{lot}{\contentsline {table}{\numberline {2}{\ignorespaces Toxicity analysis and bioactivity prediction of the parent and analogue compounds against various drug~targets.\relax }}{5}{table.2}}
\newlabel{tabref:ijms-262949-t002}{{2}{5}{Toxicity analysis and bioactivity prediction of the parent and analogue compounds against various drug~targets.\relax }{table.2}{}}
\newlabel{tabref:ijms-262949-t002@cref}{{[table][2][]2}{5}}
\newlabel{sect:sec2dot3-ijms-262949}{{2.3}{5}{Cytotoxicity Assay \label {sect:sec2dot3-ijms-262949}}{subsection.2.3}{}}
\newlabel{sect:sec2dot3-ijms-262949@cref}{{[subsection][3][2]2.3}{5}}
\@writefile{toc}{\contentsline {subsection}{\numberline {2.3}Cytotoxicity Assay }{5}{subsection.2.3}}
\@writefile{lot}{\contentsline {table}{\numberline {3}{\ignorespaces Determination of pD\textsubscript  {2} and E\textsubscript  {max} for the cytotoxic effect of piplartine and its analogues in murine fibroblast (NIH-3T3)~cells.\relax }}{5}{table.3}}
\newlabel{tabref:ijms-262949-t003}{{3}{5}{Determination of pD\textsubscript {2} and E\textsubscript {max} for the cytotoxic effect of piplartine and its analogues in murine fibroblast (NIH-3T3)~cells.\relax }{table.3}{}}
\newlabel{tabref:ijms-262949-t003@cref}{{[table][3][]3}{5}}
\@writefile{lof}{\contentsline {figure}{\numberline {3}{\ignorespaces Cytotoxicity evaluation using the MTT method in murine fibroblast (NIH3T3) cells after exposure for 24 h to piplartine analogues (\textbf  {\relax \mathversion  {bold}{A}}) 19A (72--2331 $\upmu $M), (\textbf  {\relax \mathversion  {bold}{B}}) 6B (62--1998 $\upmu $M), (\textbf  {\relax \mathversion  {bold}{C}}) 1G (85--2738~ $\upmu $M), (\textbf  {\relax \mathversion  {bold}{D}}) 1M (56--1796 $\upmu $M), (\textbf  {\relax \mathversion  {bold}{E}}) 14B (101--3250 $\upmu $M) and (\textbf  {\relax \mathversion  {bold}{F}}) piplartine (78--2514 $\upmu $M). Molecules were used at the same concentrations range at $\upmu $g/mL for all samples (25--800). Dimethyl sulfoxide (DMSO) was used as a negative control. The values are expressed as mean $\pm $ SEM. * \emph  {p} \textless {} 0.05 vs. DMSO~ control group. The dotted lines mark the 100\% viability~level.\relax }}{6}{figure.3}}
\newlabel{fig:ijms-262949-f003}{{3}{6}{Cytotoxicity evaluation using the MTT method in murine fibroblast (NIH3T3) cells after exposure for 24 h to piplartine analogues (\textbf {\boldmath {A}}) 19A (72--2331 $\upmu $M), (\textbf {\boldmath {B}}) 6B (62--1998 $\upmu $M), (\textbf {\boldmath {C}}) 1G (85--2738~ $\upmu $M), (\textbf {\boldmath {D}}) 1M (56--1796 $\upmu $M), (\textbf {\boldmath {E}}) 14B (101--3250 $\upmu $M) and (\textbf {\boldmath {F}}) piplartine (78--2514 $\upmu $M). Molecules were used at the same concentrations range at $\upmu $g/mL for all samples (25--800). Dimethyl sulfoxide (DMSO) was used as a negative control. The values are expressed as mean $\pm $ SEM. * \emph {p} \textless {} 0.05 vs. DMSO~ control group. The dotted lines mark the 100\% viability~level.\relax }{figure.3}{}}
\newlabel{fig:ijms-262949-f003@cref}{{[figure][3][]3}{6}}
\@writefile{lof}{\contentsline {figure}{\numberline {4}{\ignorespaces Cytotoxicity evaluation in the mouse BALB/cN macrophage (J774A.1) cell line following exposure for 24 h to piplartine analogues (\textbf  {\relax \mathversion  {bold}{A}}) 19A (72, 291 and 1165 $\upmu $M), (\textbf  {\relax \mathversion  {bold}{B}}) 6B (62, 249 and 999 $\upmu $M), (\textbf  {\relax \mathversion  {bold}{C}}) 1G (85, 342 and 1369 $\upmu $M), (\textbf  {\relax \mathversion  {bold}{D}}) 1M (56, 224 and 898 $\upmu $M), (\textbf  {\relax \mathversion  {bold}{E}}) 14B (101, 406 and 1625 $\upmu $M) and (\textbf  {\relax \mathversion  {bold}{F}}) piplartine (78, 314 and 1257 $\upmu $M). Molecules were used at the same concentrations range at $\upmu $g/mL for all samples (25, 100 and 400). Dulbecco\IeC {\textquoteright }s Modified Eagle Medium (DMEM) was used as a negative control. Cells were analysed by flow cytometry (20,000 events/sample). The values are expressed as mean $\pm $ SEM. * \emph  {p \textless {}} 0.05 and **** \emph  {p \textless {}} 0.0001 vs. DMEM control~group.\relax }}{7}{figure.4}}
\newlabel{fig:ijms-262949-f004}{{4}{7}{Cytotoxicity evaluation in the mouse BALB/cN macrophage (J774A.1) cell line following exposure for 24 h to piplartine analogues (\textbf {\boldmath {A}}) 19A (72, 291 and 1165 $\upmu $M), (\textbf {\boldmath {B}}) 6B (62, 249 and 999 $\upmu $M), (\textbf {\boldmath {C}}) 1G (85, 342 and 1369 $\upmu $M), (\textbf {\boldmath {D}}) 1M (56, 224 and 898 $\upmu $M), (\textbf {\boldmath {E}}) 14B (101, 406 and 1625 $\upmu $M) and (\textbf {\boldmath {F}}) piplartine (78, 314 and 1257 $\upmu $M). Molecules were used at the same concentrations range at $\upmu $g/mL for all samples (25, 100 and 400). Dulbecco’s Modified Eagle Medium (DMEM) was used as a negative control. Cells were analysed by flow cytometry (20,000 events/sample). The values are expressed as mean $\pm $ SEM. * \emph {p \textless {}} 0.05 and **** \emph {p \textless {}} 0.0001 vs. DMEM control~group.\relax }{figure.4}{}}
\newlabel{fig:ijms-262949-f004@cref}{{[figure][4][]4}{7}}
\@writefile{lof}{\contentsline {figure}{\numberline {5}{\ignorespaces Evaluation of the cell death mechanism mediated by (\textbf  {\relax \mathversion  {bold}{A}}) piplartine (78, 314 and 1257 $\upmu $M) and its analogues (\textbf  {\relax \mathversion  {bold}{B}}) 1G (85, 342 and 1369 $\upmu $M), (\textbf  {\relax \mathversion  {bold}{C}}) 1M (56, 224 and 898 $\upmu $M), (\textbf  {\relax \mathversion  {bold}{D}}) 6B (62, 249 and 999 $\upmu $M), (\textbf  {\relax \mathversion  {bold}{E}}) 14B (101, 406 and 1625 $\upmu $M) and (\textbf  {\relax \mathversion  {bold}{F}}) 19A (72, 291 and 1165 $\upmu $M) in J774A.1 cells following treatment for 24 h at the same concentrations range at $\upmu $g/mL for all samples (25, 100 and 400) using annexin-V FITC (apoptosis marker) and propidium iodide (PI, necrosis marker) staining. Cells were analysed by flow cytometry (20,000 events/sample). The values are expressed as mean $\pm $ SEM. * \emph  {p} \textless {} 0.05 vs. DMEM untreated control group. \# \emph  {p \textless {}} 0.05 vs. apoptosis staining from each respective~group.\relax }}{8}{figure.5}}
\newlabel{fig:ijms-262949-f005}{{5}{8}{Evaluation of the cell death mechanism mediated by (\textbf {\boldmath {A}}) piplartine (78, 314 and 1257 $\upmu $M) and its analogues (\textbf {\boldmath {B}}) 1G (85, 342 and 1369 $\upmu $M), (\textbf {\boldmath {C}}) 1M (56, 224 and 898 $\upmu $M), (\textbf {\boldmath {D}}) 6B (62, 249 and 999 $\upmu $M), (\textbf {\boldmath {E}}) 14B (101, 406 and 1625 $\upmu $M) and (\textbf {\boldmath {F}}) 19A (72, 291 and 1165 $\upmu $M) in J774A.1 cells following treatment for 24 h at the same concentrations range at $\upmu $g/mL for all samples (25, 100 and 400) using annexin-V FITC (apoptosis marker) and propidium iodide (PI, necrosis marker) staining. Cells were analysed by flow cytometry (20,000 events/sample). The values are expressed as mean $\pm $ SEM. * \emph {p} \textless {} 0.05 vs. DMEM untreated control group. \# \emph {p \textless {}} 0.05 vs. apoptosis staining from each respective~group.\relax }{figure.5}{}}
\newlabel{fig:ijms-262949-f005@cref}{{[figure][5][]5}{8}}
\newlabel{sect:sec2dot4-ijms-262949}{{2.4}{8}{In Vitro Experiments in Adult Worms of S. mansoni \label {sect:sec2dot4-ijms-262949}}{subsection.2.4}{}}
\newlabel{sect:sec2dot4-ijms-262949@cref}{{[subsection][4][2]2.4}{8}}
\@writefile{toc}{\contentsline {subsection}{\numberline {2.4}In Vitro Experiments in Adult Worms of S. mansoni }{8}{subsection.2.4}}
\citation{B6-ijms-262949,B20-ijms-262949}
\citation{B6-ijms-262949,B21-ijms-262949}
\citation{B6-ijms-262949}
\citation{B22-ijms-262949,B23-ijms-262949}
\citation{B15-ijms-262949}
\citation{B15-ijms-262949}
\@writefile{lot}{\contentsline {table}{\numberline {4}{\ignorespaces \unhbox \voidb@x \hbox {In vitro} effects of compounds in 49-day-old \emph  {S. mansoni}~worms.\relax }}{9}{table.4}}
\newlabel{tabref:ijms-262949-t004}{{4}{9}{\mbox {In vitro} effects of compounds in 49-day-old \emph {S. mansoni}~worms.\relax }{table.4}{}}
\newlabel{tabref:ijms-262949-t004@cref}{{[table][4][]4}{9}}
\newlabel{sect:sec3-ijms-262949}{{3}{9}{Discussion \label {sect:sec3-ijms-262949}}{section.3}{}}
\newlabel{sect:sec3-ijms-262949@cref}{{[section][3][]3}{9}}
\@writefile{toc}{\contentsline {section}{\numberline {3}Discussion }{9}{section.3}}
\citation{B24-ijms-262949}
\citation{B25-ijms-262949}
\citation{B25-ijms-262949}
\citation{B26-ijms-262949}
\citation{B27-ijms-262949}
\citation{B28-ijms-262949}
\citation{B29-ijms-262949}
\citation{B30-ijms-262949}
\citation{B14-ijms-262949,B31-ijms-262949,B32-ijms-262949}
\citation{B25-ijms-262949}
\citation{B33-ijms-262949}
\newlabel{sect:sec4-ijms-262949}{{4}{11}{Materials and Methods \label {sect:sec4-ijms-262949}}{section.4}{}}
\newlabel{sect:sec4-ijms-262949@cref}{{[section][4][]4}{11}}
\@writefile{toc}{\contentsline {section}{\numberline {4}Materials and Methods }{11}{section.4}}
\newlabel{sect:sec4dot1-ijms-262949}{{4.1}{11}{Piplartine and Synthetic Analogues \label {sect:sec4dot1-ijms-262949}}{subsection.4.1}{}}
\newlabel{sect:sec4dot1-ijms-262949@cref}{{[subsection][1][4]4.1}{11}}
\@writefile{toc}{\contentsline {subsection}{\numberline {4.1}Piplartine and Synthetic Analogues }{11}{subsection.4.1}}
\citation{B25-ijms-262949,B33-ijms-262949}
\citation{B34-ijms-262949}
\citation{B35-ijms-262949}
\citation{B36-ijms-262949}
\citation{B37-ijms-262949}
\citation{B38-ijms-262949}
\citation{B39-ijms-262949,B40-ijms-262949}
\newlabel{sect:sec4dot2-ijms-262949}{{4.2}{12}{Theoretical Calculations \label {sect:sec4dot2-ijms-262949}}{subsection.4.2}{}}
\newlabel{sect:sec4dot2-ijms-262949@cref}{{[subsection][2][4]4.2}{12}}
\@writefile{toc}{\contentsline {subsection}{\numberline {4.2}Theoretical Calculations }{12}{subsection.4.2}}
\newlabel{sect:sec4dot3-ijms-262949}{{4.3}{12}{UV--Vis Absorption Spectra \label {sect:sec4dot3-ijms-262949}}{subsection.4.3}{}}
\newlabel{sect:sec4dot3-ijms-262949@cref}{{[subsection][3][4]4.3}{12}}
\@writefile{toc}{\contentsline {subsection}{\numberline {4.3}UV--Vis Absorption Spectra }{12}{subsection.4.3}}
\newlabel{sect:sec4dot4-ijms-262949}{{4.4}{12}{In Silico Physicochemical and Toxicity Studies \label {sect:sec4dot4-ijms-262949}}{subsection.4.4}{}}
\newlabel{sect:sec4dot4-ijms-262949@cref}{{[subsection][4][4]4.4}{12}}
\@writefile{toc}{\contentsline {subsection}{\numberline {4.4}In Silico Physicochemical and Toxicity Studies }{12}{subsection.4.4}}
\citation{B28-ijms-262949}
\citation{B28-ijms-262949}
\citation{B41-ijms-262949}
\citation{B42-ijms-262949,B43-ijms-262949}
\newlabel{sect:sec4dot5-ijms-262949}{{4.5}{13}{Cytotoxicity Assay \label {sect:sec4dot5-ijms-262949}}{subsection.4.5}{}}
\newlabel{sect:sec4dot5-ijms-262949@cref}{{[subsection][5][4]4.5}{13}}
\@writefile{toc}{\contentsline {subsection}{\numberline {4.5}Cytotoxicity Assay }{13}{subsection.4.5}}
\newlabel{sect:sec4dot5dot1-ijms-262949}{{4.5.1}{13}{NIH3T3 and J774A.1 Cell Culture \label {sect:sec4dot5dot1-ijms-262949}}{subsubsection.4.5.1}{}}
\newlabel{sect:sec4dot5dot1-ijms-262949@cref}{{[subsubsection][1][4,5]4.5.1}{13}}
\@writefile{toc}{\contentsline {subsubsection}{\numberline {4.5.1}NIH3T3 and J774A.1 Cell Culture }{13}{subsubsection.4.5.1}}
\newlabel{sect:sec4dot5dot2-ijms-262949}{{4.5.2}{13}{Cell Viability Assays \label {sect:sec4dot5dot2-ijms-262949}}{subsubsection.4.5.2}{}}
\newlabel{sect:sec4dot5dot2-ijms-262949@cref}{{[subsubsection][2][4,5]4.5.2}{13}}
\@writefile{toc}{\contentsline {subsubsection}{\numberline {4.5.2}Cell Viability Assays }{13}{subsubsection.4.5.2}}
\newlabel{sect:sec4dot6-ijms-262949}{{4.6}{13}{Animals and Parasites \label {sect:sec4dot6-ijms-262949}}{subsection.4.6}{}}
\newlabel{sect:sec4dot6-ijms-262949@cref}{{[subsection][6][4]4.6}{13}}
\@writefile{toc}{\contentsline {subsection}{\numberline {4.6}Animals and Parasites }{13}{subsection.4.6}}
\newlabel{sect:sec4dot7-ijms-262949}{{4.7}{13}{Adult Schistosomes \label {sect:sec4dot7-ijms-262949}}{subsection.4.7}{}}
\newlabel{sect:sec4dot7-ijms-262949@cref}{{[subsection][7][4]4.7}{13}}
\@writefile{toc}{\contentsline {subsection}{\numberline {4.7}Adult Schistosomes }{13}{subsection.4.7}}
\citation{B44-ijms-262949}
\citation{B45-ijms-262949,B46-ijms-262949,B47-ijms-262949}
\newlabel{sect:sec4dot8-ijms-262949}{{4.8}{14}{In Vitro Experiments with Adult Worms of S. mansoni \label {sect:sec4dot8-ijms-262949}}{subsection.4.8}{}}
\newlabel{sect:sec4dot8-ijms-262949@cref}{{[subsection][8][4]4.8}{14}}
\@writefile{toc}{\contentsline {subsection}{\numberline {4.8}In Vitro Experiments with Adult Worms of S. mansoni }{14}{subsection.4.8}}
\newlabel{sect:sec4dot9-ijms-262949}{{4.9}{14}{Statistical Analysis \label {sect:sec4dot9-ijms-262949}}{subsection.4.9}{}}
\newlabel{sect:sec4dot9-ijms-262949@cref}{{[subsection][9][4]4.9}{14}}
\@writefile{toc}{\contentsline {subsection}{\numberline {4.9}Statistical Analysis }{14}{subsection.4.9}}
\newlabel{sect:sec5-ijms-262949}{{5}{14}{Conclusions \label {sect:sec5-ijms-262949}}{section.5}{}}
\newlabel{sect:sec5-ijms-262949@cref}{{[section][5][]5}{14}}
\@writefile{toc}{\contentsline {section}{\numberline {5}Conclusions }{14}{section.5}}
\bibcite{B1-ijms-262949}{{1}{}{{}}{{}}}
\bibcite{B2-ijms-262949}{{2}{}{{}}{{}}}
\bibcite{B3-ijms-262949}{{3}{}{{}}{{}}}
\bibcite{B4-ijms-262949}{{4}{}{{}}{{}}}
\bibcite{B5-ijms-262949}{{5}{}{{}}{{}}}
\bibcite{B6-ijms-262949}{{6}{}{{}}{{}}}
\bibcite{B7-ijms-262949}{{7}{}{{}}{{}}}
\bibcite{B8-ijms-262949}{{8}{}{{}}{{}}}
\bibcite{B9-ijms-262949}{{9}{}{{}}{{}}}
\bibcite{B10-ijms-262949}{{10}{}{{}}{{}}}
\bibcite{B11-ijms-262949}{{11}{}{{}}{{}}}
\bibcite{B12-ijms-262949}{{12}{}{{}}{{}}}
\bibcite{B13-ijms-262949}{{13}{}{{}}{{}}}
\bibcite{B14-ijms-262949}{{14}{}{{}}{{}}}
\bibcite{B15-ijms-262949}{{15}{}{{}}{{}}}
\@writefile{toc}{\contentsline {section}{References}{15}{section.5}}
\bibcite{B16-ijms-262949}{{16}{}{{}}{{}}}
\bibcite{B17-ijms-262949}{{17}{}{{}}{{}}}
\bibcite{B18-ijms-262949}{{18}{}{{}}{{}}}
\bibcite{B19-ijms-262949}{{19}{}{{}}{{}}}
\bibcite{B20-ijms-262949}{{20}{}{{}}{{}}}
\bibcite{B21-ijms-262949}{{21}{}{{}}{{}}}
\bibcite{B22-ijms-262949}{{22}{}{{}}{{}}}
\bibcite{B23-ijms-262949}{{23}{}{{}}{{}}}
\bibcite{B24-ijms-262949}{{24}{}{{}}{{}}}
\bibcite{B25-ijms-262949}{{25}{}{{}}{{}}}
\bibcite{B26-ijms-262949}{{26}{}{{}}{{}}}
\bibcite{B27-ijms-262949}{{27}{}{{}}{{}}}
\bibcite{B28-ijms-262949}{{28}{}{{}}{{}}}
\bibcite{B29-ijms-262949}{{29}{}{{}}{{}}}
\bibcite{B30-ijms-262949}{{30}{}{{}}{{}}}
\bibcite{B31-ijms-262949}{{31}{}{{}}{{}}}
\bibcite{B32-ijms-262949}{{32}{}{{}}{{}}}
\bibcite{B33-ijms-262949}{{33}{}{{}}{{}}}
\bibcite{B34-ijms-262949}{{34}{}{{}}{{}}}
\bibcite{B35-ijms-262949}{{35}{}{{}}{{}}}
\bibcite{B36-ijms-262949}{{36}{}{{}}{{}}}
\bibcite{B37-ijms-262949}{{37}{}{{}}{{}}}
\bibcite{B38-ijms-262949}{{38}{}{{}}{{}}}
\bibcite{B39-ijms-262949}{{39}{}{{}}{{}}}
\bibcite{B40-ijms-262949}{{40}{}{{}}{{}}}
\bibcite{B41-ijms-262949}{{41}{}{{}}{{}}}
\bibcite{B42-ijms-262949}{{42}{}{{}}{{}}}
\bibcite{B43-ijms-262949}{{43}{}{{}}{{}}}
\bibcite{B44-ijms-262949}{{44}{}{{}}{{}}}
\bibcite{B45-ijms-262949}{{45}{}{{}}{{}}}
\bibcite{B46-ijms-262949}{{46}{}{{}}{{}}}
\bibcite{B47-ijms-262949}{{47}{}{{}}{{}}}
\newlabel{LastPage}{{}{17}{}{page.17}{}}
\xdef\lastpage@lastpage{17}
\xdef\lastpage@lastpageHy{17}
\providecommand\NAT@force@numbers{}\NAT@force@numbers
