# Supplementary material for: Structure–Activity Relationship of Piplartine and Synthetic Analogues against Schistosoma mansoni and Cytotoxicity to Mammalian Cells
Source: MDPI journal article supplement (doi:10.3390/ijms19061802), 2018-06-19
Supplement: s2 [file s2 › ijms-262949.log]

This is pdfTeX, Version 3.14159265-2.6-1.40.18 (TeX Live 2017/W32TeX) (preloaded format=pdflatex 2018.6.14)  21 JUN 2018 15:24
entering extended mode
 restricted \write18 enabled.
 %&-line parsing enabled.
**./ijms-262949.tex
(./ijms-262949.tex
LaTeX2e <2017-04-15>
Babel <3.10> and hyphenation patterns for 84 language(s) loaded.
(./Definitions/mdpi.cls

LaTeX Warning: You have requested document class `Definitions/mdpi',
               but the document class provides `mdpi'.

Document Class: mdpi 11/05/2018 MDPI paper class
(c:/texlive/2017/texmf-dist/tex/latex/base/article.cls
Document Class: article 2014/09/29 v1.4h Standard LaTeX document class
(c:/texlive/2017/texmf-dist/tex/latex/base/size10.clo
File: size10.clo 2014/09/29 v1.4h Standard LaTeX file (size option)
)
\c@part=\count79
\c@section=\count80
\c@subsection=\count81
\c@subsubsection=\count82
\c@paragraph=\count83
\c@subparagraph=\count84
\c@figure=\count85
\c@table=\count86
\abovecaptionskip=\skip41
\belowcaptionskip=\skip42
\bibindent=\dimen102
)
(c:/texlive/2017/texmf-dist/tex/latex/base/fontenc.sty
Package: fontenc 2017/04/05 v2.0i Standard LaTeX package

(c:/texlive/2017/texmf-dist/tex/latex/base/t1enc.def
File: t1enc.def 2017/04/05 v2.0i Standard LaTeX file
LaTeX Font Info:    Redeclaring font encoding T1 on input line 48.
))
(c:/texlive/2017/texmf-dist/tex/latex/base/inputenc.sty
Package: inputenc 2015/03/17 v1.2c Input encoding file
\inpenc@prehook=\toks14
\inpenc@posthook=\toks15

(c:/texlive/2017/texmf-dist/tex/latex/base/utf8.def
File: utf8.def 2017/01/28 v1.1t UTF-8 support for inputenc
Now handling font encoding OML ...
... no UTF-8 mapping file for font encoding OML
Now handling font encoding T1 ...
... processing UTF-8 mapping file for font encoding T1

(c:/texlive/2017/texmf-dist/tex/latex/base/t1enc.dfu
File: t1enc.dfu 2017/01/28 v1.1t UTF-8 support for inputenc
   defining Unicode char U+00A0 (decimal 160)
   defining Unicode char U+00A1 (decimal 161)
   defining Unicode char U+00A3 (decimal 163)
   defining Unicode char U+00AB (decimal 171)
   defining Unicode char U+00AD (decimal 173)
   defining Unicode char U+00BB (decimal 187)
   defining Unicode char U+00BF (decimal 191)
   defining Unicode char U+00C0 (decimal 192)
   defining Unicode char U+00C1 (decimal 193)
   defining Unicode char U+00C2 (decimal 194)
   defining Unicode char U+00C3 (decimal 195)
   defining Unicode char U+00C4 (decimal 196)
   defining Unicode char U+00C5 (decimal 197)
   defining Unicode char U+00C6 (decimal 198)
   defining Unicode char U+00C7 (decimal 199)
   defining Unicode char U+00C8 (decimal 200)
   defining Unicode char U+00C9 (decimal 201)
   defining Unicode char U+00CA (decimal 202)
   defining Unicode char U+00CB (decimal 203)
   defining Unicode char U+00CC (decimal 204)
   defining Unicode char U+00CD (decimal 205)
   defining Unicode char U+00CE (decimal 206)
   defining Unicode char U+00CF (decimal 207)
   defining Unicode char U+00D0 (decimal 208)
   defining Unicode char U+00D1 (decimal 209)
   defining Unicode char U+00D2 (decimal 210)
   defining Unicode char U+00D3 (decimal 211)
   defining Unicode char U+00D4 (decimal 212)
   defining Unicode char U+00D5 (decimal 213)
   defining Unicode char U+00D6 (decimal 214)
   defining Unicode char U+00D8 (decimal 216)
   defining Unicode char U+00D9 (decimal 217)
   defining Unicode char U+00DA (decimal 218)
   defining Unicode char U+00DB (decimal 219)
   defining Unicode char U+00DC (decimal 220)
   defining Unicode char U+00DD (decimal 221)
   defining Unicode char U+00DE (decimal 222)
   defining Unicode char U+00DF (decimal 223)
   defining Unicode char U+00E0 (decimal 224)
   defining Unicode char U+00E1 (decimal 225)
   defining Unicode char U+00E2 (decimal 226)
   defining Unicode char U+00E3 (decimal 227)
   defining Unicode char U+00E4 (decimal 228)
   defining Unicode char U+00E5 (decimal 229)
   defining Unicode char U+00E6 (decimal 230)
   defining Unicode char U+00E7 (decimal 231)
   defining Unicode char U+00E8 (decimal 232)
   defining Unicode char U+00E9 (decimal 233)
   defining Unicode char U+00EA (decimal 234)
   defining Unicode char U+00EB (decimal 235)
   defining Unicode char U+00EC (decimal 236)
   defining Unicode char U+00ED (decimal 237)
   defining Unicode char U+00EE (decimal 238)
   defining Unicode char U+00EF (decimal 239)
   defining Unicode char U+00F0 (decimal 240)
   defining Unicode char U+00F1 (decimal 241)
   defining Unicode char U+00F2 (decimal 242)
   defining Unicode char U+00F3 (decimal 243)
   defining Unicode char U+00F4 (decimal 244)
   defining Unicode char U+00F5 (decimal 245)
   defining Unicode char U+00F6 (decimal 246)
   defining Unicode char U+00F8 (decimal 248)
   defining Unicode char U+00F9 (decimal 249)
   defining Unicode char U+00FA (decimal 250)
   defining Unicode char U+00FB (decimal 251)
   defining Unicode char U+00FC (decimal 252)
   defining Unicode char U+00FD (decimal 253)
   defining Unicode char U+00FE (decimal 254)
   defining Unicode char U+00FF (decimal 255)
   defining Unicode char U+0100 (decimal 256)
   defining Unicode char U+0101 (decimal 257)
   defining Unicode char U+0102 (decimal 258)
   defining Unicode char U+0103 (decimal 259)
   defining Unicode char U+0104 (decimal 260)
   defining Unicode char U+0105 (decimal 261)
   defining Unicode char U+0106 (decimal 262)
   defining Unicode char U+0107 (decimal 263)
   defining Unicode char U+0108 (decimal 264)
   defining Unicode char U+0109 (decimal 265)
   defining Unicode char U+010A (decimal 266)
   defining Unicode char U+010B (decimal 267)
   defining Unicode char U+010C (decimal 268)
   defining Unicode char U+010D (decimal 269)
   defining Unicode char U+010E (decimal 270)
   defining Unicode char U+010F (decimal 271)
   defining Unicode char U+0110 (decimal 272)
   defining Unicode char U+0111 (decimal 273)
   defining Unicode char U+0112 (decimal 274)
   defining Unicode char U+0113 (decimal 275)
   defining Unicode char U+0114 (decimal 276)
   defining Unicode char U+0115 (decimal 277)
   defining Unicode char U+0116 (decimal 278)
   defining Unicode char U+0117 (decimal 279)
   defining Unicode char U+0118 (decimal 280)
   defining Unicode char U+0119 (decimal 281)
   defining Unicode char U+011A (decimal 282)
   defining Unicode char U+011B (decimal 283)
   defining Unicode char U+011C (decimal 284)
   defining Unicode char U+011D (decimal 285)
   defining Unicode char U+011E (decimal 286)
   defining Unicode char U+011F (decimal 287)
   defining Unicode char U+0120 (decimal 288)
   defining Unicode char U+0121 (decimal 289)
   defining Unicode char U+0122 (decimal 290)
   defining Unicode char U+0123 (decimal 291)
   defining Unicode char U+0124 (decimal 292)
   defining Unicode char U+0125 (decimal 293)
   defining Unicode char U+0128 (decimal 296)
   defining Unicode char U+0129 (decimal 297)
   defining Unicode char U+012A (decimal 298)
   defining Unicode char U+012B (decimal 299)
   defining Unicode char U+012C (decimal 300)
   defining Unicode char U+012D (decimal 301)
   defining Unicode char U+012E (decimal 302)
   defining Unicode char U+012F (decimal 303)
   defining Unicode char U+0130 (decimal 304)
   defining Unicode char U+0131 (decimal 305)
   defining Unicode char U+0132 (decimal 306)
   defining Unicode char U+0133 (decimal 307)
   defining Unicode char U+0134 (decimal 308)
   defining Unicode char U+0135 (decimal 309)
   defining Unicode char U+0136 (decimal 310)
   defining Unicode char U+0137 (decimal 311)
   defining Unicode char U+0139 (decimal 313)
   defining Unicode char U+013A (decimal 314)
   defining Unicode char U+013B (decimal 315)
   defining Unicode char U+013C (decimal 316)
   defining Unicode char U+013D (decimal 317)
   defining Unicode char U+013E (decimal 318)
   defining Unicode char U+0141 (decimal 321)
   defining Unicode char U+0142 (decimal 322)
   defining Unicode char U+0143 (decimal 323)
   defining Unicode char U+0144 (decimal 324)
   defining Unicode char U+0145 (decimal 325)
   defining Unicode char U+0146 (decimal 326)
   defining Unicode char U+0147 (decimal 327)
   defining Unicode char U+0148 (decimal 328)
   defining Unicode char U+014A (decimal 330)
   defining Unicode char U+014B (decimal 331)
   defining Unicode char U+014C (decimal 332)
   defining Unicode char U+014D (decimal 333)
   defining Unicode char U+014E (decimal 334)
   defining Unicode char U+014F (decimal 335)
   defining Unicode char U+0150 (decimal 336)
   defining Unicode char U+0151 (decimal 337)
   defining Unicode char U+0152 (decimal 338)
   defining Unicode char U+0153 (decimal 339)
   defining Unicode char U+0154 (decimal 340)
   defining Unicode char U+0155 (decimal 341)
   defining Unicode char U+0156 (decimal 342)
   defining Unicode char U+0157 (decimal 343)
   defining Unicode char U+0158 (decimal 344)
   defining Unicode char U+0159 (decimal 345)
   defining Unicode char U+015A (decimal 346)
   defining Unicode char U+015B (decimal 347)
   defining Unicode char U+015C (decimal 348)
   defining Unicode char U+015D (decimal 349)
   defining Unicode char U+015E (decimal 350)
   defining Unicode char U+015F (decimal 351)
   defining Unicode char U+0160 (decimal 352)
   defining Unicode char U+0161 (decimal 353)
   defining Unicode char U+0162 (decimal 354)
   defining Unicode char U+0163 (decimal 355)
   defining Unicode char U+0164 (decimal 356)
   defining Unicode char U+0165 (decimal 357)
   defining Unicode char U+0168 (decimal 360)
   defining Unicode char U+0169 (decimal 361)
   defining Unicode char U+016A (decimal 362)
   defining Unicode char U+016B (decimal 363)
   defining Unicode char U+016C (decimal 364)
   defining Unicode char U+016D (decimal 365)
   defining Unicode char U+016E (decimal 366)
   defining Unicode char U+016F (decimal 367)
   defining Unicode char U+0170 (decimal 368)
   defining Unicode char U+0171 (decimal 369)
   defining Unicode char U+0172 (decimal 370)
   defining Unicode char U+0173 (decimal 371)
   defining Unicode char U+0174 (decimal 372)
   defining Unicode char U+0175 (decimal 373)
   defining Unicode char U+0176 (decimal 374)
   defining Unicode char U+0177 (decimal 375)
   defining Unicode char U+0178 (decimal 376)
   defining Unicode char U+0179 (decimal 377)
   defining Unicode char U+017A (decimal 378)
   defining Unicode char U+017B (decimal 379)
   defining Unicode char U+017C (decimal 380)
   defining Unicode char U+017D (decimal 381)
   defining Unicode char U+017E (decimal 382)
   defining Unicode char U+01CD (decimal 461)
   defining Unicode char U+01CE (decimal 462)
   defining Unicode char U+01CF (decimal 463)
   defining Unicode char U+01D0 (decimal 464)
   defining Unicode char U+01D1 (decimal 465)
   defining Unicode char U+01D2 (decimal 466)
   defining Unicode char U+01D3 (decimal 467)
   defining Unicode char U+01D4 (decimal 468)
   defining Unicode char U+01E2 (decimal 482)
   defining Unicode char U+01E3 (decimal 483)
   defining Unicode char U+01E6 (decimal 486)
   defining Unicode char U+01E7 (decimal 487)
   defining Unicode char U+01E8 (decimal 488)
   defining Unicode char U+01E9 (decimal 489)
   defining Unicode char U+01EA (decimal 490)
   defining Unicode char U+01EB (decimal 491)
   defining Unicode char U+01F0 (decimal 496)
   defining Unicode char U+01F4 (decimal 500)
   defining Unicode char U+01F5 (decimal 501)
   defining Unicode char U+0218 (decimal 536)
   defining Unicode char U+0219 (decimal 537)
   defining Unicode char U+021A (decimal 538)
   defining Unicode char U+021B (decimal 539)
   defining Unicode char U+0232 (decimal 562)
   defining Unicode char U+0233 (decimal 563)
   defining Unicode char U+1E02 (decimal 7682)
   defining Unicode char U+1E03 (decimal 7683)
   defining Unicode char U+200C (decimal 8204)
   defining Unicode char U+2010 (decimal 8208)
   defining Unicode char U+2011 (decimal 8209)
   defining Unicode char U+2012 (decimal 8210)
   defining Unicode char U+2013 (decimal 8211)
   defining Unicode char U+2014 (decimal 8212)
   defining Unicode char U+2015 (decimal 8213)
   defining Unicode char U+2018 (decimal 8216)
   defining Unicode char U+2019 (decimal 8217)
   defining Unicode char U+201A (decimal 8218)
   defining Unicode char U+201C (decimal 8220)
   defining Unicode char U+201D (decimal 8221)
   defining Unicode char U+201E (decimal 8222)
   defining Unicode char U+2030 (decimal 8240)
   defining Unicode char U+2031 (decimal 8241)
   defining Unicode char U+2039 (decimal 8249)
   defining Unicode char U+203A (decimal 8250)
   defining Unicode char U+2423 (decimal 9251)
   defining Unicode char U+1E20 (decimal 7712)
   defining Unicode char U+1E21 (decimal 7713)
)
Now handling font encoding OT1 ...
... processing UTF-8 mapping file for font encoding OT1

(c:/texlive/2017/texmf-dist/tex/latex/base/ot1enc.dfu
File: ot1enc.dfu 2017/01/28 v1.1t UTF-8 support for inputenc
   defining Unicode char U+00A0 (decimal 160)
   defining Unicode char U+00A1 (decimal 161)
   defining Unicode char U+00A3 (decimal 163)
   defining Unicode char U+00AD (decimal 173)
   defining Unicode char U+00B8 (decimal 184)
   defining Unicode char U+00BF (decimal 191)
   defining Unicode char U+00C5 (decimal 197)
   defining Unicode char U+00C6 (decimal 198)
   defining Unicode char U+00D8 (decimal 216)
   defining Unicode char U+00DF (decimal 223)
   defining Unicode char U+00E6 (decimal 230)
   defining Unicode char U+00EC (decimal 236)
   defining Unicode char U+00ED (decimal 237)
   defining Unicode char U+00EE (decimal 238)
   defining Unicode char U+00EF (decimal 239)
   defining Unicode char U+00F8 (decimal 248)
   defining Unicode char U+0131 (decimal 305)
   defining Unicode char U+0141 (decimal 321)
   defining Unicode char U+0142 (decimal 322)
   defining Unicode char U+0152 (decimal 338)
   defining Unicode char U+0153 (decimal 339)
   defining Unicode char U+0174 (decimal 372)
   defining Unicode char U+0175 (decimal 373)
   defining Unicode char U+0176 (decimal 374)
   defining Unicode char U+0177 (decimal 375)
   defining Unicode char U+0218 (decimal 536)
   defining Unicode char U+0219 (decimal 537)
   defining Unicode char U+021A (decimal 538)
   defining Unicode char U+021B (decimal 539)
   defining Unicode char U+2013 (decimal 8211)
   defining Unicode char U+2014 (decimal 8212)
   defining Unicode char U+2018 (decimal 8216)
   defining Unicode char U+2019 (decimal 8217)
   defining Unicode char U+201C (decimal 8220)
   defining Unicode char U+201D (decimal 8221)
)
Now handling font encoding OMS ...
... processing UTF-8 mapping file for font encoding OMS

(c:/texlive/2017/texmf-dist/tex/latex/base/omsenc.dfu
File: omsenc.dfu 2017/01/28 v1.1t UTF-8 support for inputenc
   defining Unicode char U+00A7 (decimal 167)
   defining Unicode char U+00B6 (decimal 182)
   defining Unicode char U+00B7 (decimal 183)
   defining Unicode char U+2020 (decimal 8224)
   defining Unicode char U+2021 (decimal 8225)
   defining Unicode char U+2022 (decimal 8226)
)
Now handling font encoding OMX ...
... no UTF-8 mapping file for font encoding OMX
Now handling font encoding U ...
... no UTF-8 mapping file for font encoding U
   defining Unicode char U+00A9 (decimal 169)
   defining Unicode char U+00AA (decimal 170)
   defining Unicode char U+00AE (decimal 174)
   defining Unicode char U+00BA (decimal 186)
   defining Unicode char U+02C6 (decimal 710)
   defining Unicode char U+02DC (decimal 732)
   defining Unicode char U+200C (decimal 8204)
   defining Unicode char U+2026 (decimal 8230)
   defining Unicode char U+2122 (decimal 8482)
   defining Unicode char U+2423 (decimal 9251)
))
(c:/texlive/2017/texmf-dist/tex/latex/tools/calc.sty
Package: calc 2014/10/28 v4.3 Infix arithmetic (KKT,FJ)
\calc@Acount=\count87
\calc@Bcount=\count88
\calc@Adimen=\dimen103
\calc@Bdimen=\dimen104
\calc@Askip=\skip43
\calc@Bskip=\skip44
LaTeX Info: Redefining \setlength on input line 80.
LaTeX Info: Redefining \addtolength on input line 81.
\calc@Ccount=\count89
\calc@Cskip=\skip45
)
(c:/texlive/2017/texmf-dist/tex/latex/tools/indentfirst.sty
Package: indentfirst 1995/11/23 v1.03 Indent first paragraph (DPC)
)
(c:/texlive/2017/texmf-dist/tex/latex/fancyhdr/fancyhdr.sty
Package: fancyhdr 2016/09/06 3.8 Extensive control of page headers and footers
\fancy@headwidth=\skip46
\f@ncyO@elh=\skip47
\f@ncyO@erh=\skip48
\f@ncyO@olh=\skip49
\f@ncyO@orh=\skip50
\f@ncyO@elf=\skip51
\f@ncyO@erf=\skip52
\f@ncyO@olf=\skip53
\f@ncyO@orf=\skip54
)
(c:/texlive/2017/texmf-dist/tex/latex/graphics/graphicx.sty
Package: graphicx 2014/10/28 v1.0g Enhanced LaTeX Graphics (DPC,SPQR)

(c:/texlive/2017/texmf-dist/tex/latex/graphics/keyval.sty
Package: keyval 2014/10/28 v1.15 key=value parser (DPC)
\KV@toks@=\toks16
)
(c:/texlive/2017/texmf-dist/tex/latex/graphics/graphics.sty
Package: graphics 2017/04/14 v1.1b Standard LaTeX Graphics (DPC,SPQR)

(c:/texlive/2017/texmf-dist/tex/latex/graphics/trig.sty
Package: trig 2016/01/03 v1.10 sin cos tan (DPC)
)
(c:/texlive/2017/texmf-dist/tex/latex/graphics-cfg/graphics.cfg
File: graphics.cfg 2016/06/04 v1.11 sample graphics configuration
)
Package graphics Info: Driver file: pdftex.def on input line 99.

(c:/texlive/2017/texmf-dist/tex/latex/graphics-def/pdftex.def
File: pdftex.def 2017/01/12 v0.06k Graphics/color for pdfTeX

(c:/texlive/2017/texmf-dist/tex/generic/oberdiek/infwarerr.sty
Package: infwarerr 2016/05/16 v1.4 Providing info/warning/error messages (HO)
)
(c:/texlive/2017/texmf-dist/tex/generic/oberdiek/ltxcmds.sty
Package: ltxcmds 2016/05/16 v1.23 LaTeX kernel commands for general use (HO)
)
\Gread@gobject=\count90
))
\Gin@req@height=\dimen105
\Gin@req@width=\dimen106
)
(c:/texlive/2017/texmf-dist/tex/latex/oberdiek/epstopdf.sty
Package: epstopdf 2016/05/15 v2.6 Conversion with epstopdf on the fly (HO)

(c:/texlive/2017/texmf-dist/tex/latex/oberdiek/epstopdf-base.sty
Package: epstopdf-base 2016/05/15 v2.6 Base part for package epstopdf

(c:/texlive/2017/texmf-dist/tex/latex/oberdiek/grfext.sty
Package: grfext 2016/05/16 v1.2 Manage graphics extensions (HO)

(c:/texlive/2017/texmf-dist/tex/generic/oberdiek/kvdefinekeys.sty
Package: kvdefinekeys 2016/05/16 v1.4 Define keys (HO)
))
(c:/texlive/2017/texmf-dist/tex/latex/oberdiek/kvoptions.sty
Package: kvoptions 2016/05/16 v3.12 Key value format for package options (HO)

(c:/texlive/2017/texmf-dist/tex/generic/oberdiek/kvsetkeys.sty
Package: kvsetkeys 2016/05/16 v1.17 Key value parser (HO)

(c:/texlive/2017/texmf-dist/tex/generic/oberdiek/etexcmds.sty
Package: etexcmds 2016/05/16 v1.6 Avoid name clashes with e-TeX commands (HO)

(c:/texlive/2017/texmf-dist/tex/generic/oberdiek/ifluatex.sty
Package: ifluatex 2016/05/16 v1.4 Provides the ifluatex switch (HO)
Package ifluatex Info: LuaTeX not detected.
)
Package etexcmds Info: Could not find \expanded.
(etexcmds)             That can mean that you are not using pdfTeX 1.50 or
(etexcmds)             that some package has redefined \expanded.
(etexcmds)             In the latter case, load this package earlier.
)))
(c:/texlive/2017/texmf-dist/tex/generic/oberdiek/pdftexcmds.sty
Package: pdftexcmds 2017/03/19 v0.25 Utility functions of pdfTeX for LuaTeX (HO
)

(c:/texlive/2017/texmf-dist/tex/generic/oberdiek/ifpdf.sty
Package: ifpdf 2017/03/15 v3.2 Provides the ifpdf switch
)
Package pdftexcmds Info: LuaTeX not detected.
Package pdftexcmds Info: \pdf@primitive is available.
Package pdftexcmds Info: \pdf@ifprimitive is available.
Package pdftexcmds Info: \pdfdraftmode found.
)
Package epstopdf-base Info: Redefining graphics rule for `.eps' on input line 4
38.
Package grfext Info: Graphics extension search list:
(grfext)             [.png,.pdf,.jpg,.mps,.jpeg,.jbig2,.jb2,.PNG,.PDF,.JPG,.JPE
G,.JBIG2,.JB2,.eps]
(grfext)             \AppendGraphicsExtensions on input line 456.

(c:/texlive/2017/texmf-dist/tex/latex/latexconfig/epstopdf-sys.cfg
File: epstopdf-sys.cfg 2010/07/13 v1.3 Configuration of (r)epstopdf for TeX Liv
e
)))
(c:/texlive/2017/texmf-dist/tex/latex/lastpage/lastpage.sty
Package: lastpage 2015/03/29 v1.2m Refers to last page's name (HMM; JPG)
)
(c:/texlive/2017/texmf-dist/tex/latex/base/ifthen.sty
Package: ifthen 2014/09/29 v1.1c Standard LaTeX ifthen package (DPC)
)
(c:/texlive/2017/texmf-dist/tex/latex/lineno/lineno.sty
Package: lineno 2005/11/02 line numbers on paragraphs v4.41
\linenopenalty=\count91
\output=\toks17
\linenoprevgraf=\count92
\linenumbersep=\dimen107
\linenumberwidth=\dimen108
\c@linenumber=\count93
\c@pagewiselinenumber=\count94
\c@LN@truepage=\count95
\c@internallinenumber=\count96
\c@internallinenumbers=\count97
\quotelinenumbersep=\dimen109
\bframerule=\dimen110
\bframesep=\dimen111
\bframebox=\box26
LaTeX Info: Redefining \\ on input line 3056.
)
(c:/texlive/2017/texmf-dist/tex/latex/float/float.sty
Package: float 2001/11/08 v1.3d Float enhancements (AL)
\c@float@type=\count98
\float@exts=\toks18
\float@box=\box27
\@float@everytoks=\toks19
\@floatcapt=\box28
)
(c:/texlive/2017/texmf-dist/tex/latex/amsmath/amsmath.sty
Package: amsmath 2016/11/05 v2.16a AMS math features
\@mathmargin=\skip55

For additional information on amsmath, use the `?' option.
(c:/texlive/2017/texmf-dist/tex/latex/amsmath/amstext.sty
Package: amstext 2000/06/29 v2.01 AMS text

(c:/texlive/2017/texmf-dist/tex/latex/amsmath/amsgen.sty
File: amsgen.sty 1999/11/30 v2.0 generic functions
\@emptytoks=\toks20
\ex@=\dimen112
))
(c:/texlive/2017/texmf-dist/tex/latex/amsmath/amsbsy.sty
Package: amsbsy 1999/11/29 v1.2d Bold Symbols
\pmbraise@=\dimen113
)
(c:/texlive/2017/texmf-dist/tex/latex/amsmath/amsopn.sty
Package: amsopn 2016/03/08 v2.02 operator names
)
\inf@bad=\count99
LaTeX Info: Redefining \frac on input line 213.
\uproot@=\count100
\leftroot@=\count101
LaTeX Info: Redefining \overline on input line 375.
\classnum@=\count102
\DOTSCASE@=\count103
LaTeX Info: Redefining \ldots on input line 472.
LaTeX Info: Redefining \dots on input line 475.
LaTeX Info: Redefining \cdots on input line 596.
\Mathstrutbox@=\box29
\strutbox@=\box30
\big@size=\dimen114
LaTeX Font Info:    Redeclaring font encoding OML on input line 712.
LaTeX Font Info:    Redeclaring font encoding OMS on input line 713.
\macc@depth=\count104
\c@MaxMatrixCols=\count105
\dotsspace@=\muskip10
\c@parentequation=\count106
\dspbrk@lvl=\count107
\tag@help=\toks21
\row@=\count108
\column@=\count109
\maxfields@=\count110
\andhelp@=\toks22
\eqnshift@=\dimen115
\alignsep@=\dimen116
\tagshift@=\dimen117
\tagwidth@=\dimen118
\totwidth@=\dimen119
\lineht@=\dimen120
\@envbody=\toks23
\multlinegap=\skip56
\multlinetaggap=\skip57
\mathdisplay@stack=\toks24
LaTeX Info: Redefining \[ on input line 2817.
LaTeX Info: Redefining \] on input line 2818.
)
(c:/texlive/2017/texmf-dist/tex/latex/setspace/setspace.sty
Package: setspace 2011/12/19 v6.7a set line spacing
)
(c:/texlive/2017/texmf-dist/tex/latex/enumitem/enumitem.sty
Package: enumitem 2011/09/28 v3.5.2 Customized lists
\labelindent=\skip58
\enit@outerparindent=\dimen121
\enit@toks=\toks25
\enit@inbox=\box31
\enitdp@description=\count111
)
(c:/texlive/2017/texmf-dist/tex/latex/psnfss/mathpazo.sty
Package: mathpazo 2005/04/12 PSNFSS-v9.2a Palatino w/ Pazo Math (D.Puga, WaS) 
\symupright=\mathgroup4
)
(c:/texlive/2017/texmf-dist/tex/latex/booktabs/booktabs.sty
Package: booktabs 2016/04/27 v1.618033 publication quality tables
\heavyrulewidth=\dimen122
\lightrulewidth=\dimen123
\cmidrulewidth=\dimen124
\belowrulesep=\dimen125
\belowbottomsep=\dimen126
\aboverulesep=\dimen127
\abovetopsep=\dimen128
\cmidrulesep=\dimen129
\cmidrulekern=\dimen130
\defaultaddspace=\dimen131
\@cmidla=\count112
\@cmidlb=\count113
\@aboverulesep=\dimen132
\@belowrulesep=\dimen133
\@thisruleclass=\count114
\@lastruleclass=\count115
\@thisrulewidth=\dimen134
)
(c:/texlive/2017/texmf-dist/tex/latex/titlesec/titlesec.sty
Package: titlesec 2016/03/21 v2.10.2 Sectioning titles
\ttl@box=\box32
\beforetitleunit=\skip59
\aftertitleunit=\skip60
\ttl@plus=\dimen135
\ttl@minus=\dimen136
\ttl@toksa=\toks26
\titlewidth=\dimen137
\titlewidthlast=\dimen138
\titlewidthfirst=\dimen139
)
(c:/texlive/2017/texmf-dist/tex/latex/etoolbox/etoolbox.sty
Package: etoolbox 2017/01/02 v2.4 e-TeX tools for LaTeX (JAW)
\etb@tempcnta=\count116
)
(c:/texlive/2017/texmf-dist/tex/latex/tabto-ltx/tabto.sty
Package: tabto 2013/03/25  v 1.3  Another tabbing mechanism
\CurrentLineWidth=\dimen140
)
(c:/texlive/2017/texmf-dist/tex/latex/graphics/color.sty
Package: color 2016/07/10 v1.1e Standard LaTeX Color (DPC)

(c:/texlive/2017/texmf-dist/tex/latex/graphics-cfg/color.cfg
File: color.cfg 2016/01/02 v1.6 sample color configuration
)
Package color Info: Driver file: pdftex.def on input line 147.
)
(c:/texlive/2017/texmf-dist/tex/latex/soul/soul.sty
Package: soul 2003/11/17 v2.4 letterspacing/underlining (mf)
\SOUL@word=\toks27
\SOUL@lasttoken=\toks28
\SOUL@cmds=\toks29
\SOUL@buffer=\toks30
\SOUL@token=\toks31
\SOUL@spaceskip=\skip61
\SOUL@ttwidth=\dimen141
\SOUL@uldp=\dimen142
\SOUL@ulht=\dimen143
)
(c:/texlive/2017/texmf-dist/tex/latex/multirow/multirow.sty
Package: multirow 2016/11/25 v2.2 Span multiple rows of a table
\multirow@colwidth=\skip62
\multirow@cntb=\count117
\multirow@dima=\skip63
\bigstrutjot=\dimen144
)
(c:/texlive/2017/texmf-dist/tex/latex/microtype/microtype.sty
Package: microtype 2016/05/14 v2.6a Micro-typographical refinements (RS)
\MT@toks=\toks32
\MT@count=\count118
LaTeX Info: Redefining \textls on input line 774.
\MT@outer@kern=\dimen145
LaTeX Info: Redefining \textmicrotypecontext on input line 1310.
\MT@listname@count=\count119

(c:/texlive/2017/texmf-dist/tex/latex/microtype/microtype-pdftex.def
File: microtype-pdftex.def 2016/05/14 v2.6a Definitions specific to pdftex (RS)

LaTeX Info: Redefining \lsstyle on input line 916.
LaTeX Info: Redefining \lslig on input line 916.
\MT@outer@space=\skip64
)
Package microtype Info: Loading configuration file microtype.cfg.

(c:/texlive/2017/texmf-dist/tex/latex/microtype/microtype.cfg
File: microtype.cfg 2016/05/14 v2.6a microtype main configuration file (RS)
))
(c:/texlive/2017/texmf-dist/tex/latex/pgf/frontendlayer/tikz.sty
(c:/texlive/2017/texmf-dist/tex/latex/pgf/basiclayer/pgf.sty
(c:/texlive/2017/texmf-dist/tex/latex/pgf/utilities/pgfrcs.sty
(c:/texlive/2017/texmf-dist/tex/generic/pgf/utilities/pgfutil-common.tex
\pgfutil@everybye=\toks33
\pgfutil@tempdima=\dimen146
\pgfutil@tempdimb=\dimen147

(c:/texlive/2017/texmf-dist/tex/generic/pgf/utilities/pgfutil-common-lists.tex)
) (c:/texlive/2017/texmf-dist/tex/generic/pgf/utilities/pgfutil-latex.def
\pgfutil@abb=\box33

(c:/texlive/2017/texmf-dist/tex/latex/ms/everyshi.sty
Package: everyshi 2001/05/15 v3.00 EveryShipout Package (MS)
))
(c:/texlive/2017/texmf-dist/tex/generic/pgf/utilities/pgfrcs.code.tex
Package: pgfrcs 2015/08/07 v3.0.1a (rcs-revision 1.31)
))
Package: pgf 2015/08/07 v3.0.1a (rcs-revision 1.15)

(c:/texlive/2017/texmf-dist/tex/latex/pgf/basiclayer/pgfcore.sty
(c:/texlive/2017/texmf-dist/tex/latex/pgf/systemlayer/pgfsys.sty
(c:/texlive/2017/texmf-dist/tex/generic/pgf/systemlayer/pgfsys.code.tex
Package: pgfsys 2014/07/09 v3.0.1a (rcs-revision 1.48)

(c:/texlive/2017/texmf-dist/tex/generic/pgf/utilities/pgfkeys.code.tex
\pgfkeys@pathtoks=\toks34
\pgfkeys@temptoks=\toks35

(c:/texlive/2017/texmf-dist/tex/generic/pgf/utilities/pgfkeysfiltered.code.tex
\pgfkeys@tmptoks=\toks36
))
\pgf@x=\dimen148
\pgf@y=\dimen149
\pgf@xa=\dimen150
\pgf@ya=\dimen151
\pgf@xb=\dimen152
\pgf@yb=\dimen153
\pgf@xc=\dimen154
\pgf@yc=\dimen155
\w@pgf@writea=\write3
\r@pgf@reada=\read1
\c@pgf@counta=\count120
\c@pgf@countb=\count121
\c@pgf@countc=\count122
\c@pgf@countd=\count123
\t@pgf@toka=\toks37
\t@pgf@tokb=\toks38
\t@pgf@tokc=\toks39
 (c:/texlive/2017/texmf-dist/tex/generic/pgf/systemlayer/pgf.cfg
File: pgf.cfg 2008/05/14  (rcs-revision 1.7)
)
Driver file for pgf: pgfsys-pdftex.def

(c:/texlive/2017/texmf-dist/tex/generic/pgf/systemlayer/pgfsys-pdftex.def
File: pgfsys-pdftex.def 2014/10/11  (rcs-revision 1.35)

(c:/texlive/2017/texmf-dist/tex/generic/pgf/systemlayer/pgfsys-common-pdf.def
File: pgfsys-common-pdf.def 2013/10/10  (rcs-revision 1.13)
)))
(c:/texlive/2017/texmf-dist/tex/generic/pgf/systemlayer/pgfsyssoftpath.code.tex
File: pgfsyssoftpath.code.tex 2013/09/09  (rcs-revision 1.9)
\pgfsyssoftpath@smallbuffer@items=\count124
\pgfsyssoftpath@bigbuffer@items=\count125
)
(c:/texlive/2017/texmf-dist/tex/generic/pgf/systemlayer/pgfsysprotocol.code.tex
File: pgfsysprotocol.code.tex 2006/10/16  (rcs-revision 1.4)
)) (c:/texlive/2017/texmf-dist/tex/latex/xcolor/xcolor.sty
Package: xcolor 2016/05/11 v2.12 LaTeX color extensions (UK)

(c:/texlive/2017/texmf-dist/tex/latex/graphics-cfg/color.cfg
File: color.cfg 2016/01/02 v1.6 sample color configuration
)
Package xcolor Info: Driver file: pdftex.def on input line 225.
LaTeX Info: Redefining \color on input line 709.
Package xcolor Info: Model `cmy' substituted by `cmy0' on input line 1348.
Package xcolor Info: Model `hsb' substituted by `rgb' on input line 1352.
Package xcolor Info: Model `RGB' extended on input line 1364.
Package xcolor Info: Model `HTML' substituted by `rgb' on input line 1366.
Package xcolor Info: Model `Hsb' substituted by `hsb' on input line 1367.
Package xcolor Info: Model `tHsb' substituted by `hsb' on input line 1368.
Package xcolor Info: Model `HSB' substituted by `hsb' on input line 1369.
Package xcolor Info: Model `Gray' substituted by `gray' on input line 1370.
Package xcolor Info: Model `wave' substituted by `hsb' on input line 1371.
)
(c:/texlive/2017/texmf-dist/tex/generic/pgf/basiclayer/pgfcore.code.tex
Package: pgfcore 2010/04/11 v3.0.1a (rcs-revision 1.7)

(c:/texlive/2017/texmf-dist/tex/generic/pgf/math/pgfmath.code.tex
(c:/texlive/2017/texmf-dist/tex/generic/pgf/math/pgfmathcalc.code.tex
(c:/texlive/2017/texmf-dist/tex/generic/pgf/math/pgfmathutil.code.tex)
(c:/texlive/2017/texmf-dist/tex/generic/pgf/math/pgfmathparser.code.tex
\pgfmath@dimen=\dimen156
\pgfmath@count=\count126
\pgfmath@box=\box34
\pgfmath@toks=\toks40
\pgfmath@stack@operand=\toks41
\pgfmath@stack@operation=\toks42
)
(c:/texlive/2017/texmf-dist/tex/generic/pgf/math/pgfmathfunctions.code.tex
(c:/texlive/2017/texmf-dist/tex/generic/pgf/math/pgfmathfunctions.basic.code.te
x)
(c:/texlive/2017/texmf-dist/tex/generic/pgf/math/pgfmathfunctions.trigonometric
.code.tex)
(c:/texlive/2017/texmf-dist/tex/generic/pgf/math/pgfmathfunctions.random.code.t
ex)
(c:/texlive/2017/texmf-dist/tex/generic/pgf/math/pgfmathfunctions.comparison.co
de.tex)
(c:/texlive/2017/texmf-dist/tex/generic/pgf/math/pgfmathfunctions.base.code.tex
)
(c:/texlive/2017/texmf-dist/tex/generic/pgf/math/pgfmathfunctions.round.code.te
x)
(c:/texlive/2017/texmf-dist/tex/generic/pgf/math/pgfmathfunctions.misc.code.tex
)
(c:/texlive/2017/texmf-dist/tex/generic/pgf/math/pgfmathfunctions.integerarithm
etics.code.tex)))
(c:/texlive/2017/texmf-dist/tex/generic/pgf/math/pgfmathfloat.code.tex
\c@pgfmathroundto@lastzeros=\count127
))
(c:/texlive/2017/texmf-dist/tex/generic/pgf/basiclayer/pgfcorepoints.code.tex
File: pgfcorepoints.code.tex 2013/10/07  (rcs-revision 1.27)
\pgf@picminx=\dimen157
\pgf@picmaxx=\dimen158
\pgf@picminy=\dimen159
\pgf@picmaxy=\dimen160
\pgf@pathminx=\dimen161
\pgf@pathmaxx=\dimen162
\pgf@pathminy=\dimen163
\pgf@pathmaxy=\dimen164
\pgf@xx=\dimen165
\pgf@xy=\dimen166
\pgf@yx=\dimen167
\pgf@yy=\dimen168
\pgf@zx=\dimen169
\pgf@zy=\dimen170
)
(c:/texlive/2017/texmf-dist/tex/generic/pgf/basiclayer/pgfcorepathconstruct.cod
e.tex
File: pgfcorepathconstruct.code.tex 2013/10/07  (rcs-revision 1.29)
\pgf@path@lastx=\dimen171
\pgf@path@lasty=\dimen172
)
(c:/texlive/2017/texmf-dist/tex/generic/pgf/basiclayer/pgfcorepathusage.code.te
x
File: pgfcorepathusage.code.tex 2014/11/02  (rcs-revision 1.24)
\pgf@shorten@end@additional=\dimen173
\pgf@shorten@start@additional=\dimen174
)
(c:/texlive/2017/texmf-dist/tex/generic/pgf/basiclayer/pgfcorescopes.code.tex
File: pgfcorescopes.code.tex 2015/05/08  (rcs-revision 1.46)
\pgfpic=\box35
\pgf@hbox=\box36
\pgf@layerbox@main=\box37
\pgf@picture@serial@count=\count128
)
(c:/texlive/2017/texmf-dist/tex/generic/pgf/basiclayer/pgfcoregraphicstate.code
.tex
File: pgfcoregraphicstate.code.tex 2014/11/02  (rcs-revision 1.12)
\pgflinewidth=\dimen175
)
(c:/texlive/2017/texmf-dist/tex/generic/pgf/basiclayer/pgfcoretransformations.c
ode.tex
File: pgfcoretransformations.code.tex 2015/08/07  (rcs-revision 1.20)
\pgf@pt@x=\dimen176
\pgf@pt@y=\dimen177
\pgf@pt@temp=\dimen178
)
(c:/texlive/2017/texmf-dist/tex/generic/pgf/basiclayer/pgfcorequick.code.tex
File: pgfcorequick.code.tex 2008/10/09  (rcs-revision 1.3)
)
(c:/texlive/2017/texmf-dist/tex/generic/pgf/basiclayer/pgfcoreobjects.code.tex
File: pgfcoreobjects.code.tex 2006/10/11  (rcs-revision 1.2)
)
(c:/texlive/2017/texmf-dist/tex/generic/pgf/basiclayer/pgfcorepathprocessing.co
de.tex
File: pgfcorepathprocessing.code.tex 2013/09/09  (rcs-revision 1.9)
)
(c:/texlive/2017/texmf-dist/tex/generic/pgf/basiclayer/pgfcorearrows.code.tex
File: pgfcorearrows.code.tex 2015/05/14  (rcs-revision 1.43)
\pgfarrowsep=\dimen179
)
(c:/texlive/2017/texmf-dist/tex/generic/pgf/basiclayer/pgfcoreshade.code.tex
File: pgfcoreshade.code.tex 2013/07/15  (rcs-revision 1.15)
\pgf@max=\dimen180
\pgf@sys@shading@range@num=\count129
)
(c:/texlive/2017/texmf-dist/tex/generic/pgf/basiclayer/pgfcoreimage.code.tex
File: pgfcoreimage.code.tex 2013/07/15  (rcs-revision 1.18)

(c:/texlive/2017/texmf-dist/tex/generic/pgf/basiclayer/pgfcoreexternal.code.tex
File: pgfcoreexternal.code.tex 2014/07/09  (rcs-revision 1.21)
\pgfexternal@startupbox=\box38
))
(c:/texlive/2017/texmf-dist/tex/generic/pgf/basiclayer/pgfcorelayers.code.tex
File: pgfcorelayers.code.tex 2013/07/18  (rcs-revision 1.7)
)
(c:/texlive/2017/texmf-dist/tex/generic/pgf/basiclayer/pgfcoretransparency.code
.tex
File: pgfcoretransparency.code.tex 2013/09/30  (rcs-revision 1.5)
)
(c:/texlive/2017/texmf-dist/tex/generic/pgf/basiclayer/pgfcorepatterns.code.tex
File: pgfcorepatterns.code.tex 2013/11/07  (rcs-revision 1.5)
)))
(c:/texlive/2017/texmf-dist/tex/generic/pgf/modules/pgfmoduleshapes.code.tex
File: pgfmoduleshapes.code.tex 2014/03/21  (rcs-revision 1.35)
\pgfnodeparttextbox=\box39
)
(c:/texlive/2017/texmf-dist/tex/generic/pgf/modules/pgfmoduleplot.code.tex
File: pgfmoduleplot.code.tex 2015/08/03  (rcs-revision 1.13)
)
(c:/texlive/2017/texmf-dist/tex/latex/pgf/compatibility/pgfcomp-version-0-65.st
y
Package: pgfcomp-version-0-65 2007/07/03 v3.0.1a (rcs-revision 1.7)
\pgf@nodesepstart=\dimen181
\pgf@nodesepend=\dimen182
)
(c:/texlive/2017/texmf-dist/tex/latex/pgf/compatibility/pgfcomp-version-1-18.st
y
Package: pgfcomp-version-1-18 2007/07/23 v3.0.1a (rcs-revision 1.1)
)) (c:/texlive/2017/texmf-dist/tex/latex/pgf/utilities/pgffor.sty
(c:/texlive/2017/texmf-dist/tex/latex/pgf/utilities/pgfkeys.sty
(c:/texlive/2017/texmf-dist/tex/generic/pgf/utilities/pgfkeys.code.tex))
(c:/texlive/2017/texmf-dist/tex/latex/pgf/math/pgfmath.sty
(c:/texlive/2017/texmf-dist/tex/generic/pgf/math/pgfmath.code.tex))
(c:/texlive/2017/texmf-dist/tex/generic/pgf/utilities/pgffor.code.tex
Package: pgffor 2013/12/13 v3.0.1a (rcs-revision 1.25)

(c:/texlive/2017/texmf-dist/tex/generic/pgf/math/pgfmath.code.tex)
\pgffor@iter=\dimen183
\pgffor@skip=\dimen184
\pgffor@stack=\toks43
\pgffor@toks=\toks44
))
(c:/texlive/2017/texmf-dist/tex/generic/pgf/frontendlayer/tikz/tikz.code.tex
Package: tikz 2015/08/07 v3.0.1a (rcs-revision 1.151)

(c:/texlive/2017/texmf-dist/tex/generic/pgf/libraries/pgflibraryplothandlers.co
de.tex
File: pgflibraryplothandlers.code.tex 2013/08/31 v3.0.1a (rcs-revision 1.20)
\pgf@plot@mark@count=\count130
\pgfplotmarksize=\dimen185
)
\tikz@lastx=\dimen186
\tikz@lasty=\dimen187
\tikz@lastxsaved=\dimen188
\tikz@lastysaved=\dimen189
\tikzleveldistance=\dimen190
\tikzsiblingdistance=\dimen191
\tikz@figbox=\box40
\tikz@figbox@bg=\box41
\tikz@tempbox=\box42
\tikz@tempbox@bg=\box43
\tikztreelevel=\count131
\tikznumberofchildren=\count132
\tikznumberofcurrentchild=\count133
\tikz@fig@count=\count134

(c:/texlive/2017/texmf-dist/tex/generic/pgf/modules/pgfmodulematrix.code.tex
File: pgfmodulematrix.code.tex 2013/09/17  (rcs-revision 1.8)
\pgfmatrixcurrentrow=\count135
\pgfmatrixcurrentcolumn=\count136
\pgf@matrix@numberofcolumns=\count137
)
\tikz@expandcount=\count138

(c:/texlive/2017/texmf-dist/tex/generic/pgf/frontendlayer/tikz/libraries/tikzli
brarytopaths.code.tex
File: tikzlibrarytopaths.code.tex 2008/06/17 v3.0.1a (rcs-revision 1.2)
))) (./Definitions/journalnames.tex)
(c:/texlive/2017/texmf-dist/tex/latex/amscls/amsthm.sty
Package: amsthm 2015/03/04 v2.20.2
\thm@style=\toks45
\thm@bodyfont=\toks46
\thm@headfont=\toks47
\thm@notefont=\toks48
\thm@headpunct=\toks49
\thm@preskip=\skip65
\thm@postskip=\skip66
\thm@headsep=\skip67
\dth@everypar=\toks50
)
\c@theorem=\count139
\c@lemma=\count140
\c@corollary=\count141
\c@proposition=\count142
\c@characterization=\count143
\c@property=\count144
\c@problem=\count145
\c@example=\count146
\c@examplesanddefinitions=\count147
\c@remark=\count148
\c@definition=\count149
\c@hypothesis=\count150
\c@notation=\count151

(c:/texlive/2017/texmf-dist/tex/latex/hyphenat/hyphenat.sty
Package: hyphenat 2009/09/02 v2.3c hyphenation utilities
\langwohyphens=\language84
LaTeX Info: Redefining \_ on input line 43.
)
(c:/texlive/2017/texmf-dist/tex/latex/natbib/natbib.sty
Package: natbib 2010/09/13 8.31b (PWD, AO)
\bibhang=\skip68
\bibsep=\skip69
LaTeX Info: Redefining \cite on input line 694.
\c@NAT@ctr=\count152
)
(c:/texlive/2017/texmf-dist/tex/latex/hyperref/hyperref.sty
Package: hyperref 2017/03/14 v6.85a Hypertext links for LaTeX

(c:/texlive/2017/texmf-dist/tex/generic/oberdiek/hobsub-hyperref.sty
Package: hobsub-hyperref 2016/05/16 v1.14 Bundle oberdiek, subset hyperref (HO)


(c:/texlive/2017/texmf-dist/tex/generic/oberdiek/hobsub-generic.sty
Package: hobsub-generic 2016/05/16 v1.14 Bundle oberdiek, subset generic (HO)
Package: hobsub 2016/05/16 v1.14 Construct package bundles (HO)
Package hobsub Info: Skipping package `infwarerr' (already loaded).
Package hobsub Info: Skipping package `ltxcmds' (already loaded).
Package hobsub Info: Skipping package `ifluatex' (already loaded).
Package: ifvtex 2016/05/16 v1.6 Detect VTeX and its facilities (HO)
Package ifvtex Info: VTeX not detected.
Package: intcalc 2016/05/16 v1.2 Expandable calculations with integers (HO)
Package hobsub Info: Skipping package `ifpdf' (already loaded).
Package hobsub Info: Skipping package `etexcmds' (already loaded).
Package hobsub Info: Skipping package `kvsetkeys' (already loaded).
Package hobsub Info: Skipping package `kvdefinekeys' (already loaded).
Package hobsub Info: Skipping package `pdftexcmds' (already loaded).
Package: pdfescape 2016/05/16 v1.14 Implements pdfTeX's escape features (HO)
Package: bigintcalc 2016/05/16 v1.4 Expandable calculations on big integers (HO
)
Package: bitset 2016/05/16 v1.2 Handle bit-vector datatype (HO)
Package: uniquecounter 2016/05/16 v1.3 Provide unlimited unique counter (HO)
)
Package hobsub Info: Skipping package `hobsub' (already loaded).
Package: letltxmacro 2016/05/16 v1.5 Let assignment for LaTeX macros (HO)
Package: hopatch 2016/05/16 v1.3 Wrapper for package hooks (HO)
Package: xcolor-patch 2016/05/16 xcolor patch
Package: atveryend 2016/05/16 v1.9 Hooks at the very end of document (HO)
Package: atbegshi 2016/06/09 v1.18 At begin shipout hook (HO)
Package: refcount 2016/05/16 v3.5 Data extraction from label references (HO)
Package: hycolor 2016/05/16 v1.8 Color options for hyperref/bookmark (HO)
)
(c:/texlive/2017/texmf-dist/tex/generic/ifxetex/ifxetex.sty
Package: ifxetex 2010/09/12 v0.6 Provides ifxetex conditional
)
(c:/texlive/2017/texmf-dist/tex/latex/oberdiek/auxhook.sty
Package: auxhook 2016/05/16 v1.4 Hooks for auxiliary files (HO)
)
\@linkdim=\dimen192
\Hy@linkcounter=\count153
\Hy@pagecounter=\count154

(c:/texlive/2017/texmf-dist/tex/latex/hyperref/pd1enc.def
File: pd1enc.def 2017/03/14 v6.85a Hyperref: PDFDocEncoding definition (HO)
Now handling font encoding PD1 ...
... no UTF-8 mapping file for font encoding PD1
)
\Hy@SavedSpaceFactor=\count155

(c:/texlive/2017/texmf-dist/tex/latex/latexconfig/hyperref.cfg
File: hyperref.cfg 2002/06/06 v1.2 hyperref configuration of TeXLive
)
Package hyperref Info: Option `unicode' set `true' on input line 4374.

(c:/texlive/2017/texmf-dist/tex/latex/hyperref/puenc.def
File: puenc.def 2017/03/14 v6.85a Hyperref: PDF Unicode definition (HO)
Now handling font encoding PU ...
... no UTF-8 mapping file for font encoding PU
)
Package hyperref Info: Option `bookmarksopen' set `true' on input line 4374.
Package hyperref Info: Option `pdffitwindow' set `true' on input line 4374.
Package hyperref Info: Option `colorlinks' set `true' on input line 4374.
Package hyperref Info: Option `hyperfootnotes' set `false' on input line 4374.
Package hyperref Info: Hyper figures OFF on input line 4498.
Package hyperref Info: Link nesting OFF on input line 4503.
Package hyperref Info: Hyper index ON on input line 4506.
Package hyperref Info: Plain pages OFF on input line 4513.
Package hyperref Info: Backreferencing OFF on input line 4518.
Package hyperref Info: Implicit mode ON; LaTeX internals redefined.
Package hyperref Info: Bookmarks ON on input line 4751.
\c@Hy@tempcnt=\count156

(c:/texlive/2017/texmf-dist/tex/latex/url/url.sty
\Urlmuskip=\muskip11
Package: url 2013/09/16  ver 3.4  Verb mode for urls, etc.
)
LaTeX Info: Redefining \url on input line 5104.
\XeTeXLinkMargin=\dimen193
\Fld@menulength=\count157
\Field@Width=\dimen194
\Fld@charsize=\dimen195
Package hyperref Info: Hyper figures OFF on input line 6358.
Package hyperref Info: Link nesting OFF on input line 6363.
Package hyperref Info: Hyper index ON on input line 6366.
Package hyperref Info: backreferencing OFF on input line 6373.
Package hyperref Info: Link coloring ON on input line 6376.
Package hyperref Info: Link coloring with OCG OFF on input line 6383.
Package hyperref Info: PDF/A mode OFF on input line 6388.
LaTeX Info: Redefining \ref on input line 6428.
LaTeX Info: Redefining \pageref on input line 6432.
\Hy@abspage=\count158
\c@Item=\count159
)

Package hyperref Message: Driver: hpdftex.

(c:/texlive/2017/texmf-dist/tex/latex/hyperref/hpdftex.def
File: hpdftex.def 2017/03/14 v6.85a Hyperref driver for pdfTeX
\Fld@listcount=\count160
\c@bookmark@seq@number=\count161

(c:/texlive/2017/texmf-dist/tex/latex/oberdiek/rerunfilecheck.sty
Package: rerunfilecheck 2016/05/16 v1.8 Rerun checks for auxiliary files (HO)
Package uniquecounter Info: New unique counter `rerunfilecheck' on input line 2
82.
)
\Hy@SectionHShift=\skip70
)
(c:/texlive/2017/texmf-dist/tex/latex/footmisc/footmisc.sty
Package: footmisc 2011/06/06 v5.5b a miscellany of footnote facilities
\FN@temptoken=\toks51
\footnotemargin=\dimen196
\c@pp@next@reset=\count162
Package footmisc Info: Declaring symbol style bringhurst on input line 855.
Package footmisc Info: Declaring symbol style chicago on input line 863.
Package footmisc Info: Declaring symbol style wiley on input line 872.
Package footmisc Info: Declaring symbol style lamport-robust on input line 883.

Package footmisc Info: Declaring symbol style lamport* on input line 903.
Package footmisc Info: Declaring symbol style lamport*-robust on input line 924
.
)
(c:/texlive/2017/texmf-dist/tex/latex/titlesec/block.tss
File: block.tss 2016/03/15
)
(c:/texlive/2017/texmf-dist/tex/latex/geometry/geometry.sty
Package: geometry 2010/09/12 v5.6 Page Geometry
\Gm@cnth=\count163
\Gm@cntv=\count164
\c@Gm@tempcnt=\count165
\Gm@bindingoffset=\dimen197
\Gm@wd@mp=\dimen198
\Gm@odd@mp=\dimen199
\Gm@even@mp=\dimen256
\Gm@layoutwidth=\dimen257
\Gm@layoutheight=\dimen258
\Gm@layouthoffset=\dimen259
\Gm@layoutvoffset=\dimen260
\Gm@dimlist=\toks52
)
\@float@every@boxenv=\toks53
\c@boxenv=\count166
\@float@every@chart=\toks54
\c@chart=\count167
\@float@every@scheme=\toks55
\c@scheme=\count168
\@float@every@figure=\toks56
\@float@every@table=\toks57

(c:/texlive/2017/texmf-dist/tex/latex/caption/caption.sty
Package: caption 2016/02/21 v3.3-144 Customizing captions (AR)

(c:/texlive/2017/texmf-dist/tex/latex/caption/caption3.sty
Package: caption3 2016/05/22 v1.7-166 caption3 kernel (AR)
Package caption3 Info: TeX engine: e-TeX on input line 67.
\captionmargin=\dimen261
\captionmargin@=\dimen262
\captionwidth=\dimen263
\caption@tempdima=\dimen264
\caption@indent=\dimen265
\caption@parindent=\dimen266
\caption@hangindent=\dimen267
)
\c@ContinuedFloat=\count169
Package caption Info: float package is loaded.
Package caption Info: hyperref package is loaded.
)
\@justcentbox=\box44
\wideitemsep=\skip71
)
\@input{Definitions/unicode.aux}
\openout2 = `Definitions/unicode.aux'.

(./Definitions/unicode.tex
   defining Unicode char U+1E45 (decimal 7749)
   defining Unicode char U+1E41 (decimal 7745)
   defining Unicode char U+2003 (decimal 8195)
   defining Unicode char U+0177 (decimal 375)
   defining Unicode char U+101 (decimal 257)
   defining Unicode char U+2009 (decimal 8201)
   defining Unicode char U+2002 (decimal 8194)
   defining Unicode char U+2005 (decimal 8197)
   defining Unicode char U+0263 (decimal 611)
   defining Unicode char U+117 (decimal 279)
   defining Unicode char U+A0 (decimal 160)
   defining Unicode char U+2460 (decimal 9312)
   defining Unicode char U+2461 (decimal 9313)
   defining Unicode char U+2462 (decimal 9314)
   defining Unicode char U+2463 (decimal 9315)
   defining Unicode char U+2464 (decimal 9316)
   defining Unicode char U+2465 (decimal 9317)
   defining Unicode char U+2466 (decimal 9318)
   defining Unicode char U+2467 (decimal 9319)
   defining Unicode char U+2468 (decimal 9320)
   defining Unicode char U+02C2 (decimal 706)
   defining Unicode char U+2033 (decimal 8243)
   defining Unicode char U+0229 (decimal 553)
   defining Unicode char U+0218 (decimal 536)
   defining Unicode char U+0219 (decimal 537)
   defining Unicode char U+021B (decimal 539)
)
(c:/texlive/2017/texmf-dist/tex/latex/colortbl/colortbl.sty
Package: colortbl 2012/02/13 v1.0a Color table columns (DPC)

(c:/texlive/2017/texmf-dist/tex/latex/tools/array.sty
Package: array 2016/10/06 v2.4d Tabular extension package (FMi)
\col@sep=\dimen268
\extrarowheight=\dimen269
\NC@list=\toks58
\extratabsurround=\skip72
\backup@length=\skip73
)
\everycr=\toks59
\minrowclearance=\skip74
)
(c:/texlive/2017/texmf-dist/tex/generic/ulem/ulem.sty
\UL@box=\box45
\UL@hyphenbox=\box46
\UL@skip=\skip75
\UL@hook=\toks60
\UL@height=\dimen270
\UL@pe=\count170
\UL@pixel=\dimen271
\ULC@box=\box47
Package: ulem 2012/05/18
\ULdepth=\dimen272
)
(c:/texlive/2017/texmf-dist/tex/latex/tools/longtable.sty
Package: longtable 2014/10/28 v4.11 Multi-page Table package (DPC)
\LTleft=\skip76
\LTright=\skip77
\LTpre=\skip78
\LTpost=\skip79
\LTchunksize=\count171
\LTcapwidth=\dimen273
\LT@head=\box48
\LT@firsthead=\box49
\LT@foot=\box50
\LT@lastfoot=\box51
\LT@cols=\count172
\LT@rows=\count173
\c@LT@tables=\count174
\c@LT@chunks=\count175
\LT@p@ftn=\toks61
)
(c:/texlive/2017/texmf-dist/tex/latex/threeparttable/threeparttable.sty
Package: threeparttable 2003/06/13  v 3.0
\@tempboxb=\box52
)
(c:/texlive/2017/texmf-dist/tex/latex/frankenstein/attrib.sty
Package: attrib 2001/08/31 v1.3 attribution of block elements (Frankenstein's h
at)

(c:/texlive/2017/texmf-dist/tex/latex/frankenstein/moredefs.sty
Package: moredefs 2001/08/31 v1.8 more defining commands (Frankenstein's brain)

\sc@toks@a=\toks62
\sc@toks@b=\toks63
)
\AttribMinSkip=\skip80
)
(c:/texlive/2017/texmf-dist/tex/latex/subfigure/subfigure.sty
Package: subfigure 2002/03/15 v2.1.5 subfigure package
\subfigtopskip=\skip81
\subfigcapskip=\skip82
\subfigcaptopadj=\dimen274
\subfigbottomskip=\skip83
\subfigcapmargin=\dimen275
\subfiglabelskip=\skip84
\c@subfigure=\count176
\c@lofdepth=\count177
\c@subtable=\count178
\c@lotdepth=\count179

****************************************
* Local config file subfigure.cfg used *
****************************************
(c:/texlive/2017/texmf-dist/tex/latex/subfigure/subfigure.cfg)
\subfig@top=\skip85
\subfig@bottom=\skip86
)
(c:/texlive/2017/texmf-dist/tex/latex/chemstyle/chemscheme.sty
Package: chemscheme 2013/07/03 v2.0m Schemes for chemistry

(c:/texlive/2017/texmf-dist/tex/latex/psfrag/psfrag.sty
Package: psfrag 1998/04/11 v3.04 PSfrag (MCG)
\pfg@pcount=\count180
\pfg@scount=\count181
\pfg@temp=\write4
)
\cst@ref@count=\count182

(c:/texlive/2017/texmf-dist/tex/latex/chemcompounds/chemcompounds.sty
Package: chemcompounds 2006/12/01 v1.1.3 Dictionary for compound numbering
\c@chemcompounds@counter=\count183
))
(c:/texlive/2017/texmf-dist/tex/latex/mathcomp/mathcomp.sty
Package: mathcomp 2001/01/07 v0.1f (TBo)

(c:/texlive/2017/texmf-dist/tex/latex/base/textcomp.sty
Package: textcomp 2017/04/05 v2.0i Standard LaTeX package
Package textcomp Info: Sub-encoding information:
(textcomp)               5 = only ISO-Adobe without \textcurrency
(textcomp)               4 = 5 + \texteuro
(textcomp)               3 = 4 + \textohm
(textcomp)               2 = 3 + \textestimated + \textcurrency
(textcomp)               1 = TS1 - \textcircled - \t
(textcomp)               0 = TS1 (full)
(textcomp)             Font families with sub-encoding setting implement
(textcomp)             only a restricted character set as indicated.
(textcomp)             Family '?' is the default used for unknown fonts.
(textcomp)             See the documentation for details.
Package textcomp Info: Setting ? sub-encoding to TS1/1 on input line 79.

(c:/texlive/2017/texmf-dist/tex/latex/base/ts1enc.def
File: ts1enc.def 2001/06/05 v3.0e (jk/car/fm) Standard LaTeX file
Now handling font encoding TS1 ...
... processing UTF-8 mapping file for font encoding TS1

(c:/texlive/2017/texmf-dist/tex/latex/base/ts1enc.dfu
File: ts1enc.dfu 2017/01/28 v1.1t UTF-8 support for inputenc
   defining Unicode char U+00A2 (decimal 162)
   defining Unicode char U+00A3 (decimal 163)
   defining Unicode char U+00A4 (decimal 164)
   defining Unicode char U+00A5 (decimal 165)
   defining Unicode char U+00A6 (decimal 166)
   defining Unicode char U+00A7 (decimal 167)
   defining Unicode char U+00A8 (decimal 168)
   defining Unicode char U+00A9 (decimal 169)
   defining Unicode char U+00AA (decimal 170)
   defining Unicode char U+00AC (decimal 172)
   defining Unicode char U+00AE (decimal 174)
   defining Unicode char U+00AF (decimal 175)
   defining Unicode char U+00B0 (decimal 176)
   defining Unicode char U+00B1 (decimal 177)
   defining Unicode char U+00B2 (decimal 178)
   defining Unicode char U+00B3 (decimal 179)
   defining Unicode char U+00B4 (decimal 180)
   defining Unicode char U+00B5 (decimal 181)
   defining Unicode char U+00B6 (decimal 182)
   defining Unicode char U+00B7 (decimal 183)
   defining Unicode char U+00B9 (decimal 185)
   defining Unicode char U+00BA (decimal 186)
   defining Unicode char U+00BC (decimal 188)
   defining Unicode char U+00BD (decimal 189)
   defining Unicode char U+00BE (decimal 190)
   defining Unicode char U+00D7 (decimal 215)
   defining Unicode char U+00F7 (decimal 247)
   defining Unicode char U+0192 (decimal 402)
   defining Unicode char U+02C7 (decimal 711)
   defining Unicode char U+02D8 (decimal 728)
   defining Unicode char U+02DD (decimal 733)
   defining Unicode char U+0E3F (decimal 3647)
   defining Unicode char U+2016 (decimal 8214)
   defining Unicode char U+2020 (decimal 8224)
   defining Unicode char U+2021 (decimal 8225)
   defining Unicode char U+2022 (decimal 8226)
   defining Unicode char U+2030 (decimal 8240)
   defining Unicode char U+2031 (decimal 8241)
   defining Unicode char U+203B (decimal 8251)
   defining Unicode char U+203D (decimal 8253)
   defining Unicode char U+2044 (decimal 8260)
   defining Unicode char U+204E (decimal 8270)
   defining Unicode char U+2052 (decimal 8274)
   defining Unicode char U+20A1 (decimal 8353)
   defining Unicode char U+20A4 (decimal 8356)
   defining Unicode char U+20A6 (decimal 8358)
   defining Unicode char U+20A9 (decimal 8361)
   defining Unicode char U+20AB (decimal 8363)
   defining Unicode char U+20AC (decimal 8364)
   defining Unicode char U+20B1 (decimal 8369)
   defining Unicode char U+2103 (decimal 8451)
   defining Unicode char U+2116 (decimal 8470)
   defining Unicode char U+2117 (decimal 8471)
   defining Unicode char U+211E (decimal 8478)
   defining Unicode char U+2120 (decimal 8480)
   defining Unicode char U+2122 (decimal 8482)
   defining Unicode char U+2126 (decimal 8486)
   defining Unicode char U+2127 (decimal 8487)
   defining Unicode char U+212E (decimal 8494)
   defining Unicode char U+2190 (decimal 8592)
   defining Unicode char U+2191 (decimal 8593)
   defining Unicode char U+2192 (decimal 8594)
   defining Unicode char U+2193 (decimal 8595)
   defining Unicode char U+2329 (decimal 9001)
   defining Unicode char U+232A (decimal 9002)
   defining Unicode char U+2422 (decimal 9250)
   defining Unicode char U+25E6 (decimal 9702)
   defining Unicode char U+25EF (decimal 9711)
   defining Unicode char U+266A (decimal 9834)
))
LaTeX Info: Redefining \oldstylenums on input line 334.
Package textcomp Info: Setting cmr sub-encoding to TS1/0 on input line 349.
Package textcomp Info: Setting cmss sub-encoding to TS1/0 on input line 350.
Package textcomp Info: Setting cmtt sub-encoding to TS1/0 on input line 351.
Package textcomp Info: Setting cmvtt sub-encoding to TS1/0 on input line 352.
Package textcomp Info: Setting cmbr sub-encoding to TS1/0 on input line 353.
Package textcomp Info: Setting cmtl sub-encoding to TS1/0 on input line 354.
Package textcomp Info: Setting ccr sub-encoding to TS1/0 on input line 355.
Package textcomp Info: Setting ptm sub-encoding to TS1/4 on input line 356.
Package textcomp Info: Setting pcr sub-encoding to TS1/4 on input line 357.
Package textcomp Info: Setting phv sub-encoding to TS1/4 on input line 358.
Package textcomp Info: Setting ppl sub-encoding to TS1/3 on input line 359.
Package textcomp Info: Setting pag sub-encoding to TS1/4 on input line 360.
Package textcomp Info: Setting pbk sub-encoding to TS1/4 on input line 361.
Package textcomp Info: Setting pnc sub-encoding to TS1/4 on input line 362.
Package textcomp Info: Setting pzc sub-encoding to TS1/4 on input line 363.
Package textcomp Info: Setting bch sub-encoding to TS1/4 on input line 364.
Package textcomp Info: Setting put sub-encoding to TS1/5 on input line 365.
Package textcomp Info: Setting uag sub-encoding to TS1/5 on input line 366.
Package textcomp Info: Setting ugq sub-encoding to TS1/5 on input line 367.
Package textcomp Info: Setting ul8 sub-encoding to TS1/4 on input line 368.
Package textcomp Info: Setting ul9 sub-encoding to TS1/4 on input line 369.
Package textcomp Info: Setting augie sub-encoding to TS1/5 on input line 370.
Package textcomp Info: Setting dayrom sub-encoding to TS1/3 on input line 371.
Package textcomp Info: Setting dayroms sub-encoding to TS1/3 on input line 372.

Package textcomp Info: Setting pxr sub-encoding to TS1/0 on input line 373.
Package textcomp Info: Setting pxss sub-encoding to TS1/0 on input line 374.
Package textcomp Info: Setting pxtt sub-encoding to TS1/0 on input line 375.
Package textcomp Info: Setting txr sub-encoding to TS1/0 on input line 376.
Package textcomp Info: Setting txss sub-encoding to TS1/0 on input line 377.
Package textcomp Info: Setting txtt sub-encoding to TS1/0 on input line 378.
Package textcomp Info: Setting lmr sub-encoding to TS1/0 on input line 379.
Package textcomp Info: Setting lmdh sub-encoding to TS1/0 on input line 380.
Package textcomp Info: Setting lmss sub-encoding to TS1/0 on input line 381.
Package textcomp Info: Setting lmssq sub-encoding to TS1/0 on input line 382.
Package textcomp Info: Setting lmvtt sub-encoding to TS1/0 on input line 383.
Package textcomp Info: Setting lmtt sub-encoding to TS1/0 on input line 384.
Package textcomp Info: Setting qhv sub-encoding to TS1/0 on input line 385.
Package textcomp Info: Setting qag sub-encoding to TS1/0 on input line 386.
Package textcomp Info: Setting qbk sub-encoding to TS1/0 on input line 387.
Package textcomp Info: Setting qcr sub-encoding to TS1/0 on input line 388.
Package textcomp Info: Setting qcs sub-encoding to TS1/0 on input line 389.
Package textcomp Info: Setting qpl sub-encoding to TS1/0 on input line 390.
Package textcomp Info: Setting qtm sub-encoding to TS1/0 on input line 391.
Package textcomp Info: Setting qzc sub-encoding to TS1/0 on input line 392.
Package textcomp Info: Setting qhvc sub-encoding to TS1/0 on input line 393.
Package textcomp Info: Setting futs sub-encoding to TS1/4 on input line 394.
Package textcomp Info: Setting futx sub-encoding to TS1/4 on input line 395.
Package textcomp Info: Setting futj sub-encoding to TS1/4 on input line 396.
Package textcomp Info: Setting hlh sub-encoding to TS1/3 on input line 397.
Package textcomp Info: Setting hls sub-encoding to TS1/3 on input line 398.
Package textcomp Info: Setting hlst sub-encoding to TS1/3 on input line 399.
Package textcomp Info: Setting hlct sub-encoding to TS1/5 on input line 400.
Package textcomp Info: Setting hlx sub-encoding to TS1/5 on input line 401.
Package textcomp Info: Setting hlce sub-encoding to TS1/5 on input line 402.
Package textcomp Info: Setting hlcn sub-encoding to TS1/5 on input line 403.
Package textcomp Info: Setting hlcw sub-encoding to TS1/5 on input line 404.
Package textcomp Info: Setting hlcf sub-encoding to TS1/5 on input line 405.
Package textcomp Info: Setting pplx sub-encoding to TS1/3 on input line 406.
Package textcomp Info: Setting pplj sub-encoding to TS1/3 on input line 407.
Package textcomp Info: Setting ptmx sub-encoding to TS1/4 on input line 408.
Package textcomp Info: Setting ptmj sub-encoding to TS1/4 on input line 409.
)
\symTC=\mathgroup5
LaTeX Font Info:    Overwriting symbol font `TC' in version `bold'
(Font)                  TS1/cmr/m/n --> TS1/cmr/bx/n on input line 25.
LaTeX Font Info:    Redeclaring math symbol \dagger on input line 47.
LaTeX Font Info:    Redeclaring math symbol \ddagger on input line 48.
)
(c:/texlive/2017/texmf-dist/tex/latex/amsfonts/amsfonts.sty
Package: amsfonts 2013/01/14 v3.01 Basic AMSFonts support
\symAMSa=\mathgroup6
\symAMSb=\mathgroup7
LaTeX Font Info:    Overwriting math alphabet `\mathfrak' in version `bold'
(Font)                  U/euf/m/n --> U/euf/b/n on input line 106.
)
(c:/texlive/2017/texmf-dist/tex/latex/amsfonts/amssymb.sty
Package: amssymb 2013/01/14 v3.01 AMS font symbols
)
(c:/texlive/2017/texmf-dist/tex/latex/cjk/texinput/CJKutf8.sty
Package: CJKutf8 2015/04/18 4.8.4

(c:/texlive/2017/texmf-dist/tex/latex/cjk/texinput/CJK.sty
Package: CJK 2015/04/18 4.8.4

(c:/texlive/2017/texmf-dist/tex/latex/cjk/texinput/mule/MULEenc.sty
Package: MULEenc 2015/04/18 4.8.4
)
(c:/texlive/2017/texmf-dist/tex/latex/cjk/texinput/CJK.enc
File: CJK.enc 2015/04/18 4.8.4
Now handling font encoding C00 ...
... no UTF-8 mapping file for font encoding C00
Now handling font encoding C05 ...
... no UTF-8 mapping file for font encoding C05
Now handling font encoding C09 ...
... no UTF-8 mapping file for font encoding C09
Now handling font encoding C10 ...
... no UTF-8 mapping file for font encoding C10
Now handling font encoding C20 ...
... no UTF-8 mapping file for font encoding C20
Now handling font encoding C19 ...
... no UTF-8 mapping file for font encoding C19
Now handling font encoding C40 ...
... no UTF-8 mapping file for font encoding C40
Now handling font encoding C42 ...
... no UTF-8 mapping file for font encoding C42
Now handling font encoding C43 ...
... no UTF-8 mapping file for font encoding C43
Now handling font encoding C50 ...
... no UTF-8 mapping file for font encoding C50
Now handling font encoding C52 ...
... no UTF-8 mapping file for font encoding C52
Now handling font encoding C49 ...
... no UTF-8 mapping file for font encoding C49
Now handling font encoding C60 ...
... no UTF-8 mapping file for font encoding C60
Now handling font encoding C61 ...
... no UTF-8 mapping file for font encoding C61
Now handling font encoding C63 ...
... no UTF-8 mapping file for font encoding C63
Now handling font encoding C64 ...
... no UTF-8 mapping file for font encoding C64
Now handling font encoding C65 ...
... no UTF-8 mapping file for font encoding C65
Now handling font encoding C70 ...
... no UTF-8 mapping file for font encoding C70
Now handling font encoding C31 ...
... no UTF-8 mapping file for font encoding C31
Now handling font encoding C32 ...
... no UTF-8 mapping file for font encoding C32
Now handling font encoding C33 ...
... no UTF-8 mapping file for font encoding C33
Now handling font encoding C34 ...
... no UTF-8 mapping file for font encoding C34
Now handling font encoding C35 ...
... no UTF-8 mapping file for font encoding C35
Now handling font encoding C36 ...
... no UTF-8 mapping file for font encoding C36
Now handling font encoding C37 ...
... no UTF-8 mapping file for font encoding C37
Now handling font encoding C80 ...
... no UTF-8 mapping file for font encoding C80
Now handling font encoding C81 ...
... no UTF-8 mapping file for font encoding C81
Now handling font encoding C01 ...
... no UTF-8 mapping file for font encoding C01
Now handling font encoding C11 ...
... no UTF-8 mapping file for font encoding C11
Now handling font encoding C21 ...
... no UTF-8 mapping file for font encoding C21
Now handling font encoding C41 ...
... no UTF-8 mapping file for font encoding C41
Now handling font encoding C62 ...
... no UTF-8 mapping file for font encoding C62
)
LaTeX Info: Redefining \selectfont on input line 755.
\CJK@indent=\box53
)
(c:/texlive/2017/texmf-dist/tex/latex/base/fontenc.sty
Package: fontenc 2017/04/05 v2.0i Standard LaTeX package
))
(c:/texlive/2017/texmf-dist/tex/latex/base/fontenc.sty
Package: fontenc 2017/04/05 v2.0i Standard LaTeX package

(c:/texlive/2017/texmf-dist/tex/latex/vntex/t5enc.def
File: t5enc.def 2006/11/21 v1.4 Vietnamese T5 encoding
Now handling font encoding T5 ...
... processing UTF-8 mapping file for font encoding T5

(c:/texlive/2017/texmf-dist/tex/latex/vntex/t5enc.dfu
File: t5enc.dfu 2006/08/19 v1.1 UTF8 support for Vietnamese
   defining Unicode char U+00AB (decimal 171)
   defining Unicode char U+00BB (decimal 187)
   defining Unicode char U+00C0 (decimal 192)
   defining Unicode char U+00C1 (decimal 193)
   defining Unicode char U+00C2 (decimal 194)
   defining Unicode char U+00C3 (decimal 195)
   defining Unicode char U+00C8 (decimal 200)
   defining Unicode char U+00C9 (decimal 201)
   defining Unicode char U+00CA (decimal 202)
   defining Unicode char U+00CC (decimal 204)
   defining Unicode char U+00CD (decimal 205)
   defining Unicode char U+00D2 (decimal 210)
   defining Unicode char U+00D3 (decimal 211)
   defining Unicode char U+00D4 (decimal 212)
   defining Unicode char U+00D5 (decimal 213)
   defining Unicode char U+00D9 (decimal 217)
   defining Unicode char U+00DA (decimal 218)
   defining Unicode char U+00DD (decimal 221)
   defining Unicode char U+00E0 (decimal 224)
   defining Unicode char U+00E1 (decimal 225)
   defining Unicode char U+00E2 (decimal 226)
   defining Unicode char U+00E3 (decimal 227)
   defining Unicode char U+00E8 (decimal 232)
   defining Unicode char U+00E9 (decimal 233)
   defining Unicode char U+00EA (decimal 234)
   defining Unicode char U+00EC (decimal 236)
   defining Unicode char U+00ED (decimal 237)
   defining Unicode char U+00F2 (decimal 242)
   defining Unicode char U+00F3 (decimal 243)
   defining Unicode char U+00F4 (decimal 244)
   defining Unicode char U+00F5 (decimal 245)
   defining Unicode char U+00F9 (decimal 249)
   defining Unicode char U+00FA (decimal 250)
   defining Unicode char U+00FD (decimal 253)
   defining Unicode char U+0102 (decimal 258)
   defining Unicode char U+0103 (decimal 259)
   defining Unicode char U+0110 (decimal 272)
   defining Unicode char U+0111 (decimal 273)
   defining Unicode char U+0128 (decimal 296)
   defining Unicode char U+0129 (decimal 297)
   defining Unicode char U+0131 (decimal 305)
   defining Unicode char U+0168 (decimal 360)
   defining Unicode char U+0169 (decimal 361)
   defining Unicode char U+01A0 (decimal 416)
   defining Unicode char U+01A1 (decimal 417)
   defining Unicode char U+01AF (decimal 431)
   defining Unicode char U+01B0 (decimal 432)
   defining Unicode char U+1EA0 (decimal 7840)
   defining Unicode char U+1EA1 (decimal 7841)
   defining Unicode char U+1EA2 (decimal 7842)
   defining Unicode char U+1EA3 (decimal 7843)
   defining Unicode char U+1EA4 (decimal 7844)
   defining Unicode char U+1EA5 (decimal 7845)
   defining Unicode char U+1EA6 (decimal 7846)
   defining Unicode char U+1EA7 (decimal 7847)
   defining Unicode char U+1EA8 (decimal 7848)
   defining Unicode char U+1EA9 (decimal 7849)
   defining Unicode char U+1EAA (decimal 7850)
   defining Unicode char U+1EAB (decimal 7851)
   defining Unicode char U+1EAC (decimal 7852)
   defining Unicode char U+1EAD (decimal 7853)
   defining Unicode char U+1EAE (decimal 7854)
   defining Unicode char U+1EAF (decimal 7855)
   defining Unicode char U+1EB0 (decimal 7856)
   defining Unicode char U+1EB1 (decimal 7857)
   defining Unicode char U+1EB2 (decimal 7858)
   defining Unicode char U+1EB3 (decimal 7859)
   defining Unicode char U+1EB4 (decimal 7860)
   defining Unicode char U+1EB5 (decimal 7861)
   defining Unicode char U+1EB6 (decimal 7862)
   defining Unicode char U+1EB7 (decimal 7863)
   defining Unicode char U+1EB8 (decimal 7864)
   defining Unicode char U+1EB9 (decimal 7865)
   defining Unicode char U+1EBA (decimal 7866)
   defining Unicode char U+1EBB (decimal 7867)
   defining Unicode char U+1EBC (decimal 7868)
   defining Unicode char U+1EBD (decimal 7869)
   defining Unicode char U+1EBE (decimal 7870)
   defining Unicode char U+1EBF (decimal 7871)
   defining Unicode char U+1EC0 (decimal 7872)
   defining Unicode char U+1EC1 (decimal 7873)
   defining Unicode char U+1EC2 (decimal 7874)
   defining Unicode char U+1EC3 (decimal 7875)
   defining Unicode char U+1EC4 (decimal 7876)
   defining Unicode char U+1EC5 (decimal 7877)
   defining Unicode char U+1EC6 (decimal 7878)
   defining Unicode char U+1EC7 (decimal 7879)
   defining Unicode char U+1EC8 (decimal 7880)
   defining Unicode char U+1EC9 (decimal 7881)
   defining Unicode char U+1ECA (decimal 7882)
   defining Unicode char U+1ECB (decimal 7883)
   defining Unicode char U+1ECC (decimal 7884)
   defining Unicode char U+1ECD (decimal 7885)
   defining Unicode char U+1ECE (decimal 7886)
   defining Unicode char U+1ECF (decimal 7887)
   defining Unicode char U+1ED0 (decimal 7888)
   defining Unicode char U+1ED1 (decimal 7889)
   defining Unicode char U+1ED2 (decimal 7890)
   defining Unicode char U+1ED3 (decimal 7891)
   defining Unicode char U+1ED4 (decimal 7892)
   defining Unicode char U+1ED5 (decimal 7893)
   defining Unicode char U+1ED6 (decimal 7894)
   defining Unicode char U+1ED7 (decimal 7895)
   defining Unicode char U+1ED8 (decimal 7896)
   defining Unicode char U+1ED9 (decimal 7897)
   defining Unicode char U+1EDA (decimal 7898)
   defining Unicode char U+1EDB (decimal 7899)
   defining Unicode char U+1EDC (decimal 7900)
   defining Unicode char U+1EDD (decimal 7901)
   defining Unicode char U+1EDE (decimal 7902)
   defining Unicode char U+1EDF (decimal 7903)
   defining Unicode char U+1EE0 (decimal 7904)
   defining Unicode char U+1EE1 (decimal 7905)
   defining Unicode char U+1EE2 (decimal 7906)
   defining Unicode char U+1EE3 (decimal 7907)
   defining Unicode char U+1EE4 (decimal 7908)
   defining Unicode char U+1EE5 (decimal 7909)
   defining Unicode char U+1EE6 (decimal 7910)
   defining Unicode char U+1EE7 (decimal 7911)
   defining Unicode char U+1EE8 (decimal 7912)
   defining Unicode char U+1EE9 (decimal 7913)
   defining Unicode char U+1EEA (decimal 7914)
   defining Unicode char U+1EEB (decimal 7915)
   defining Unicode char U+1EEC (decimal 7916)
   defining Unicode char U+1EED (decimal 7917)
   defining Unicode char U+1EEE (decimal 7918)
   defining Unicode char U+1EEF (decimal 7919)
   defining Unicode char U+1EF0 (decimal 7920)
   defining Unicode char U+1EF1 (decimal 7921)
   defining Unicode char U+1EF2 (decimal 7922)
   defining Unicode char U+1EF3 (decimal 7923)
   defining Unicode char U+1EF4 (decimal 7924)
   defining Unicode char U+1EF5 (decimal 7925)
   defining Unicode char U+1EF6 (decimal 7926)
   defining Unicode char U+1EF7 (decimal 7927)
   defining Unicode char U+1EF8 (decimal 7928)
   defining Unicode char U+1EF9 (decimal 7929)
   defining Unicode char U+200C (decimal 8204)
   defining Unicode char U+2013 (decimal 8211)
   defining Unicode char U+2014 (decimal 8212)
   defining Unicode char U+2018 (decimal 8216)
   defining Unicode char U+2019 (decimal 8217)
   defining Unicode char U+201A (decimal 8218)
   defining Unicode char U+201C (decimal 8220)
   defining Unicode char U+201D (decimal 8221)
   defining Unicode char U+201E (decimal 8222)
   defining Unicode char U+2030 (decimal 8240)
   defining Unicode char U+2031 (decimal 8241)
   defining Unicode char U+2039 (decimal 8249)
   defining Unicode char U+203A (decimal 8250)
   defining Unicode char U+2423 (decimal 9251)
))
(c:/texlive/2017/texmf-dist/tex/latex/base/t1enc.def
File: t1enc.def 2017/04/05 v2.0i Standard LaTeX file
LaTeX Font Info:    Redeclaring font encoding T1 on input line 48.
))
(c:/texlive/2017/texmf-dist/tex/latex/verse/verse.sty
Package: verse 2009/09/04 v2.4a verse typesetting
\c@vslineno=\count184
\c@poemline=\count185
\c@fvsline=\count186
\c@modulo@vs=\count187
\c@verse@envctr=\count188
\versewidth=\skip87
\vgap=\skip88
\vindent=\skip89
\stanzaskip=\skip90
\vleftskip=\skip91
\vrightskip=\skip92
\c@chrsinstr=\count189
\beforepoemtitleskip=\skip93
\afterpoemtitleskip=\skip94
)
\foobox=\box54

(c:/texlive/2017/texmf-dist/tex/latex/tabulary/tabulary.sty
Package: tabulary 2014/06/11 v0.10 tabulary package (DPC)
\TY@count=\count190
\TY@linewidth=\dimen276
\tymin=\dimen277
\tymax=\dimen278
\TY@tablewidth=\dimen279
)
(c:/texlive/2017/texmf-dist/tex/latex/was/upgreek.sty
Package: upgreek 2003/02/12 v2.0 (WaS)
Package upgreek Info: Using Euler Roman for upright Greek on input line 31.
\symugrf@m=\mathgroup8
LaTeX Font Info:    Overwriting symbol font `ugrf@m' in version `bold'
(Font)                  U/eur/m/n --> U/eur/b/n on input line 38.
)
(c:/texlive/2017/texmf-dist/tex/latex/wasysym/wasysym.sty
Package: wasysym 2003/10/30 v2.0 Wasy-2 symbol support package
\symwasy=\mathgroup9
LaTeX Font Info:    Overwriting symbol font `wasy' in version `bold'
(Font)                  U/wasy/m/n --> U/wasy/b/n on input line 90.
)
(c:/texlive/2017/texmf-dist/tex/latex/fancyvrb/fancyvrb.sty
Package: fancyvrb 2008/02/07

Style option: `fancyvrb' v2.7a, with DG/SPQR fixes, and firstline=lastline fix 
<2008/02/07> (tvz)
\FV@CodeLineNo=\count191
\FV@InFile=\read2
\FV@TabBox=\box55
\c@FancyVerbLine=\count192
\FV@StepNumber=\count193
\FV@OutFile=\write5
) (c:/texlive/2017/texmf-dist/tex/latex/bera/beramono.sty
Package: beramono 2004/01/31 (WaS)
)
(c:/texlive/2017/texmf-dist/tex/latex/seqsplit/seqsplit.sty
Package: seqsplit 2006/08/07 v0.1 Splitting long sequences (DNA, RNA, proteins,
 etc.) 
)
(c:/texlive/2017/texmf-dist/tex/latex/tools/bm.sty
Package: bm 2017/01/16 v1.2c Bold Symbol Support (DPC/FMi)
\symboldoperators=\mathgroup10
\symboldletters=\mathgroup11
\symboldsymbols=\mathgroup12
\symboldupright=\mathgroup13
LaTeX Font Info:    Redeclaring math alphabet \mathbf on input line 141.
LaTeX Info: Redefining \bm on input line 207.
)
(c:/texlive/2017/texmf-dist/tex/latex/psnfss/pifont.sty
Package: pifont 2005/04/12 PSNFSS-v9.2a Pi font support (SPQR) 
LaTeX Font Info:    Try loading font information for U+pzd on input line 63.

(c:/texlive/2017/texmf-dist/tex/latex/psnfss/upzd.fd
File: upzd.fd 2001/06/04 font definitions for U/pzd.
)
LaTeX Font Info:    Try loading font information for U+psy on input line 64.

(c:/texlive/2017/texmf-dist/tex/latex/psnfss/upsy.fd
File: upsy.fd 2001/06/04 font definitions for U/psy.
))
\cellWidtha=\skip95
\cellWidthb=\skip96
\cellWidthc=\skip97
\cellWidthd=\skip98
\cellWidthe=\skip99
\cellWidthf=\skip100
\cellWidthg=\skip101
\cellWidthh=\skip102
\cellWidthi=\skip103
\cellWidthj=\skip104
\cellWidthk=\skip105
\cellWidthl=\skip106
\cellWidthm=\skip107
\cellWidthn=\skip108
\cellWidtho=\skip109
\cellWidthp=\skip110
\cellWidthq=\skip111
\cellWidthr=\skip112
\cellWidths=\skip113
\cellWidtht=\skip114
\cellWidthu=\skip115
\cellWidthv=\skip116
\cellWidthw=\skip117
\cellWidthx=\skip118
\cellWidthy=\skip119
\cellWidthz=\skip120
\cellWidthA=\skip121
\cellWidthB=\skip122
\cellWidthC=\skip123
\cellWidthD=\skip124
\cellWidthE=\skip125
\cellWidthF=\skip126
\cellWidthG=\skip127
\cellWidthH=\skip128
\cellWidthI=\skip129
\cellWidthJ=\skip130
\cellWidthK=\skip131
\cellWidthL=\skip132
\cellWidthM=\skip133
\cellWidthN=\skip134
\cellWidthO=\skip135
\cellWidthP=\skip136
\cellWidthQ=\skip137
\cellWidthR=\skip138
\cellWidthS=\skip139
\cellWidthT=\skip140
\cellWidthU=\skip141
\cellWidthV=\skip142
\cellWidthW=\skip143
\cellWidthX=\skip144
\cellWidthY=\skip145
\cellWidthZ=\skip146

(c:/texlive/2017/texmf-dist/tex/latex/cleveref/cleveref.sty
Package: cleveref 2013/12/28 v0.19 Intelligent cross-referencing
Package cleveref Info: `hyperref' support loaded on input line 2230.
LaTeX Info: Redefining \cref on input line 2230.
LaTeX Info: Redefining \Cref on input line 2230.
LaTeX Info: Redefining \crefrange on input line 2230.
LaTeX Info: Redefining \Crefrange on input line 2230.
LaTeX Info: Redefining \cpageref on input line 2230.
LaTeX Info: Redefining \Cpageref on input line 2230.
LaTeX Info: Redefining \cpagerefrange on input line 2230.
LaTeX Info: Redefining \Cpagerefrange on input line 2230.
LaTeX Info: Redefining \labelcref on input line 2230.
LaTeX Info: Redefining \labelcpageref on input line 2230.
Package cleveref Info: `amsthm' support loaded on input line 2858.
)
(c:/texlive/2017/texmf-dist/tex/generic/babel/babel.sty
Package: babel 2017/05/19 3.10 The Babel package

(c:/texlive/2017/texmf-dist/tex/generic/babel-russian/russianb.ldf
Language: russianb 2017/01/12 1.3i Russian support for the Babel system

(c:/texlive/2017/texmf-dist/tex/generic/babel/babel.def
File: babel.def 2017/05/19 3.10 Babel common definitions
\babel@savecnt=\count194
\U@D=\dimen280
)

Package babel Warning: No Cyrillic font encoding has been loaded so far.
(babel)                A font encoding should be declared before babel.
(babel)                Default `T2A' encoding will be loaded  on input line 69.


(c:/texlive/2017/texmf-dist/tex/latex/cyrillic/t2aenc.def
File: t2aenc.def 2005/09/27 v1.0i Cyrillic encoding definition file
Now handling font encoding T2A ...
... processing UTF-8 mapping file for font encoding T2A

(c:/texlive/2017/texmf-dist/tex/latex/base/t2aenc.dfu
File: t2aenc.dfu 2017/01/28 v1.1t UTF-8 support for inputenc
   defining Unicode char U+00A4 (decimal 164)
   defining Unicode char U+00A7 (decimal 167)
   defining Unicode char U+00AB (decimal 171)
   defining Unicode char U+00BB (decimal 187)
   defining Unicode char U+0131 (decimal 305)
   defining Unicode char U+0400 (decimal 1024)
   defining Unicode char U+0401 (decimal 1025)
   defining Unicode char U+0402 (decimal 1026)
   defining Unicode char U+0403 (decimal 1027)
   defining Unicode char U+0404 (decimal 1028)
   defining Unicode char U+0405 (decimal 1029)
   defining Unicode char U+0406 (decimal 1030)
   defining Unicode char U+0407 (decimal 1031)
   defining Unicode char U+0408 (decimal 1032)
   defining Unicode char U+0409 (decimal 1033)
   defining Unicode char U+040A (decimal 1034)
   defining Unicode char U+040B (decimal 1035)
   defining Unicode char U+040C (decimal 1036)
   defining Unicode char U+040D (decimal 1037)
   defining Unicode char U+040E (decimal 1038)
   defining Unicode char U+040F (decimal 1039)
   defining Unicode char U+0410 (decimal 1040)
   defining Unicode char U+0411 (decimal 1041)
   defining Unicode char U+0412 (decimal 1042)
   defining Unicode char U+0413 (decimal 1043)
   defining Unicode char U+0414 (decimal 1044)
   defining Unicode char U+0415 (decimal 1045)
   defining Unicode char U+0416 (decimal 1046)
   defining Unicode char U+0417 (decimal 1047)
   defining Unicode char U+0418 (decimal 1048)
   defining Unicode char U+0419 (decimal 1049)
   defining Unicode char U+041A (decimal 1050)
   defining Unicode char U+041B (decimal 1051)
   defining Unicode char U+041C (decimal 1052)
   defining Unicode char U+041D (decimal 1053)
   defining Unicode char U+041E (decimal 1054)
   defining Unicode char U+041F (decimal 1055)
   defining Unicode char U+0420 (decimal 1056)
   defining Unicode char U+0421 (decimal 1057)
   defining Unicode char U+0422 (decimal 1058)
   defining Unicode char U+0423 (decimal 1059)
   defining Unicode char U+0424 (decimal 1060)
   defining Unicode char U+0425 (decimal 1061)
   defining Unicode char U+0426 (decimal 1062)
   defining Unicode char U+0427 (decimal 1063)
   defining Unicode char U+0428 (decimal 1064)
   defining Unicode char U+0429 (decimal 1065)
   defining Unicode char U+042A (decimal 1066)
   defining Unicode char U+042B (decimal 1067)
   defining Unicode char U+042C (decimal 1068)
   defining Unicode char U+042D (decimal 1069)
   defining Unicode char U+042E (decimal 1070)
   defining Unicode char U+042F (decimal 1071)
   defining Unicode char U+0430 (decimal 1072)
   defining Unicode char U+0431 (decimal 1073)
   defining Unicode char U+0432 (decimal 1074)
   defining Unicode char U+0433 (decimal 1075)
   defining Unicode char U+0434 (decimal 1076)
   defining Unicode char U+0435 (decimal 1077)
   defining Unicode char U+0436 (decimal 1078)
   defining Unicode char U+0437 (decimal 1079)
   defining Unicode char U+0438 (decimal 1080)
   defining Unicode char U+0439 (decimal 1081)
   defining Unicode char U+043A (decimal 1082)
   defining Unicode char U+043B (decimal 1083)
   defining Unicode char U+043C (decimal 1084)
   defining Unicode char U+043D (decimal 1085)
   defining Unicode char U+043E (decimal 1086)
   defining Unicode char U+043F (decimal 1087)
   defining Unicode char U+0440 (decimal 1088)
   defining Unicode char U+0441 (decimal 1089)
   defining Unicode char U+0442 (decimal 1090)
   defining Unicode char U+0443 (decimal 1091)
   defining Unicode char U+0444 (decimal 1092)
   defining Unicode char U+0445 (decimal 1093)
   defining Unicode char U+0446 (decimal 1094)
   defining Unicode char U+0447 (decimal 1095)
   defining Unicode char U+0448 (decimal 1096)
   defining Unicode char U+0449 (decimal 1097)
   defining Unicode char U+044A (decimal 1098)
   defining Unicode char U+044B (decimal 1099)
   defining Unicode char U+044C (decimal 1100)
   defining Unicode char U+044D (decimal 1101)
   defining Unicode char U+044E (decimal 1102)
   defining Unicode char U+044F (decimal 1103)
   defining Unicode char U+0450 (decimal 1104)
   defining Unicode char U+0451 (decimal 1105)
   defining Unicode char U+0452 (decimal 1106)
   defining Unicode char U+0453 (decimal 1107)
   defining Unicode char U+0454 (decimal 1108)
   defining Unicode char U+0455 (decimal 1109)
   defining Unicode char U+0456 (decimal 1110)
   defining Unicode char U+0457 (decimal 1111)
   defining Unicode char U+0458 (decimal 1112)
   defining Unicode char U+0459 (decimal 1113)
   defining Unicode char U+045A (decimal 1114)
   defining Unicode char U+045B (decimal 1115)
   defining Unicode char U+045C (decimal 1116)
   defining Unicode char U+045D (decimal 1117)
   defining Unicode char U+045E (decimal 1118)
   defining Unicode char U+045F (decimal 1119)
   defining Unicode char U+0490 (decimal 1168)
   defining Unicode char U+0491 (decimal 1169)
   defining Unicode char U+0492 (decimal 1170)
   defining Unicode char U+0493 (decimal 1171)
   defining Unicode char U+0496 (decimal 1174)
   defining Unicode char U+0497 (decimal 1175)
   defining Unicode char U+0498 (decimal 1176)
   defining Unicode char U+0499 (decimal 1177)
   defining Unicode char U+049A (decimal 1178)
   defining Unicode char U+049B (decimal 1179)
   defining Unicode char U+049C (decimal 1180)
   defining Unicode char U+049D (decimal 1181)
   defining Unicode char U+04A0 (decimal 1184)
   defining Unicode char U+04A1 (decimal 1185)
   defining Unicode char U+04A2 (decimal 1186)
   defining Unicode char U+04A3 (decimal 1187)
   defining Unicode char U+04A4 (decimal 1188)
   defining Unicode char U+04A5 (decimal 1189)
   defining Unicode char U+04AA (decimal 1194)
   defining Unicode char U+04AB (decimal 1195)
   defining Unicode char U+04AE (decimal 1198)
   defining Unicode char U+04AF (decimal 1199)
   defining Unicode char U+04B0 (decimal 1200)
   defining Unicode char U+04B1 (decimal 1201)
   defining Unicode char U+04B2 (decimal 1202)
   defining Unicode char U+04B3 (decimal 1203)
   defining Unicode char U+04B6 (decimal 1206)
   defining Unicode char U+04B7 (decimal 1207)
   defining Unicode char U+04B8 (decimal 1208)
   defining Unicode char U+04B9 (decimal 1209)
   defining Unicode char U+04BA (decimal 1210)
   defining Unicode char U+04BB (decimal 1211)
   defining Unicode char U+04C0 (decimal 1216)
   defining Unicode char U+04C1 (decimal 1217)
   defining Unicode char U+04C2 (decimal 1218)
   defining Unicode char U+04D0 (decimal 1232)
   defining Unicode char U+04D1 (decimal 1233)
   defining Unicode char U+04D2 (decimal 1234)
   defining Unicode char U+04D3 (decimal 1235)
   defining Unicode char U+04D4 (decimal 1236)
   defining Unicode char U+04D5 (decimal 1237)
   defining Unicode char U+04D6 (decimal 1238)
   defining Unicode char U+04D7 (decimal 1239)
   defining Unicode char U+04D8 (decimal 1240)
   defining Unicode char U+04D9 (decimal 1241)
   defining Unicode char U+04DA (decimal 1242)
   defining Unicode char U+04DB (decimal 1243)
   defining Unicode char U+04DC (decimal 1244)
   defining Unicode char U+04DD (decimal 1245)
   defining Unicode char U+04DE (decimal 1246)
   defining Unicode char U+04DF (decimal 1247)
   defining Unicode char U+04E2 (decimal 1250)
   defining Unicode char U+04E3 (decimal 1251)
   defining Unicode char U+04E4 (decimal 1252)
   defining Unicode char U+04E5 (decimal 1253)
   defining Unicode char U+04E6 (decimal 1254)
   defining Unicode char U+04E7 (decimal 1255)
   defining Unicode char U+04E8 (decimal 1256)
   defining Unicode char U+04E9 (decimal 1257)
   defining Unicode char U+04EC (decimal 1260)
   defining Unicode char U+04ED (decimal 1261)
   defining Unicode char U+04EE (decimal 1262)
   defining Unicode char U+04EF (decimal 1263)
   defining Unicode char U+04F0 (decimal 1264)
   defining Unicode char U+04F1 (decimal 1265)
   defining Unicode char U+04F2 (decimal 1266)
   defining Unicode char U+04F3 (decimal 1267)
   defining Unicode char U+04F4 (decimal 1268)
   defining Unicode char U+04F5 (decimal 1269)
   defining Unicode char U+04F8 (decimal 1272)
   defining Unicode char U+04F9 (decimal 1273)
   defining Unicode char U+200C (decimal 8204)
   defining Unicode char U+2013 (decimal 8211)
   defining Unicode char U+2014 (decimal 8212)
   defining Unicode char U+2018 (decimal 8216)
   defining Unicode char U+2019 (decimal 8217)
   defining Unicode char U+201C (decimal 8220)
   defining Unicode char U+201D (decimal 8221)
   defining Unicode char U+201E (decimal 8222)
   defining Unicode char U+2030 (decimal 8240)
   defining Unicode char U+2031 (decimal 8241)
   defining Unicode char U+2116 (decimal 8470)
   defining Unicode char U+2329 (decimal 9001)
   defining Unicode char U+232A (decimal 9002)
   defining Unicode char U+2423 (decimal 9251)
))
Package babel Info: Making " an active character on input line 111.
)
(c:/texlive/2017/texmf-dist/tex/generic/babel-english/english.ldf
Language: english 2017/01/24 v3.3q English support from the babel system
\l@canadian = a dialect from \language\l@american 
\l@australian = a dialect from \language\l@british 
\l@newzealand = a dialect from \language\l@british 
))
(c:/texlive/2017/texmf-dist/tex/latex/combelow/combelow.sty
Package: combelow 2010/05/02 v0.99f comma below command
)
LaTeX Info: Redefining \textsubscript on input line 300.
 (./ijms-262949.aux)
\openout1 = `ijms-262949.aux'.

LaTeX Font Info:    Checking defaults for OML/cmm/m/it on input line 312.
LaTeX Font Info:    ... okay on input line 312.
LaTeX Font Info:    Checking defaults for T1/cmr/m/n on input line 312.
LaTeX Font Info:    ... okay on input line 312.
LaTeX Font Info:    Checking defaults for OT1/cmr/m/n on input line 312.
LaTeX Font Info:    ... okay on input line 312.
LaTeX Font Info:    Checking defaults for OMS/cmsy/m/n on input line 312.
LaTeX Font Info:    ... okay on input line 312.
LaTeX Font Info:    Checking defaults for OMX/cmex/m/n on input line 312.
LaTeX Font Info:    ... okay on input line 312.
LaTeX Font Info:    Checking defaults for U/cmr/m/n on input line 312.
LaTeX Font Info:    ... okay on input line 312.
LaTeX Font Info:    Checking defaults for PD1/pdf/m/n on input line 312.
LaTeX Font Info:    ... okay on input line 312.
LaTeX Font Info:    Checking defaults for PU/pdf/m/n on input line 312.
LaTeX Font Info:    ... okay on input line 312.
LaTeX Font Info:    Checking defaults for TS1/cmr/m/n on input line 312.
LaTeX Font Info:    Try loading font information for TS1+cmr on input line 312.

 (c:/texlive/2017/texmf-dist/tex/latex/base/ts1cmr.fd
File: ts1cmr.fd 2014/09/29 v2.5h Standard LaTeX font definitions
)
LaTeX Font Info:    ... okay on input line 312.
LaTeX Font Info:    Checking defaults for C00/song/m/n on input line 312.
LaTeX Font Info:    ... okay on input line 312.
LaTeX Font Info:    Checking defaults for C05/song/m/n on input line 312.
LaTeX Font Info:    ... okay on input line 312.
LaTeX Font Info:    Checking defaults for C09/song/m/n on input line 312.
LaTeX Font Info:    ... okay on input line 312.
LaTeX Font Info:    Checking defaults for C10/song/m/n on input line 312.
LaTeX Font Info:    ... okay on input line 312.
LaTeX Font Info:    Checking defaults for C20/song/m/n on input line 312.
LaTeX Font Info:    ... okay on input line 312.
LaTeX Font Info:    Checking defaults for C19/song/m/n on input line 312.
LaTeX Font Info:    ... okay on input line 312.
LaTeX Font Info:    Checking defaults for C40/song/m/n on input line 312.
LaTeX Font Info:    ... okay on input line 312.
LaTeX Font Info:    Checking defaults for C42/song/m/n on input line 312.
LaTeX Font Info:    ... okay on input line 312.
LaTeX Font Info:    Checking defaults for C43/song/m/n on input line 312.
LaTeX Font Info:    ... okay on input line 312.
LaTeX Font Info:    Checking defaults for C50/song/m/n on input line 312.
LaTeX Font Info:    ... okay on input line 312.
LaTeX Font Info:    Checking defaults for C52/song/m/n on input line 312.
LaTeX Font Info:    ... okay on input line 312.
LaTeX Font Info:    Checking defaults for C49/song/m/n on input line 312.
LaTeX Font Info:    ... okay on input line 312.
LaTeX Font Info:    Checking defaults for C60/mj/m/n on input line 312.
LaTeX Font Info:    ... okay on input line 312.
LaTeX Font Info:    Checking defaults for C61/mj/m/n on input line 312.
LaTeX Font Info:    ... okay on input line 312.
LaTeX Font Info:    Checking defaults for C63/mj/m/n on input line 312.
LaTeX Font Info:    ... okay on input line 312.
LaTeX Font Info:    Checking defaults for C64/mj/m/n on input line 312.
LaTeX Font Info:    ... okay on input line 312.
LaTeX Font Info:    Checking defaults for C65/mj/m/n on input line 312.
LaTeX Font Info:    ... okay on input line 312.
LaTeX Font Info:    Checking defaults for C70/song/m/n on input line 312.
LaTeX Font Info:    ... okay on input line 312.
LaTeX Font Info:    Checking defaults for C31/song/m/n on input line 312.
LaTeX Font Info:    ... okay on input line 312.
LaTeX Font Info:    Checking defaults for C32/song/m/n on input line 312.
LaTeX Font Info:    ... okay on input line 312.
LaTeX Font Info:    Checking defaults for C33/song/m/n on input line 312.
LaTeX Font Info:    ... okay on input line 312.
LaTeX Font Info:    Checking defaults for C34/song/m/n on input line 312.
LaTeX Font Info:    ... okay on input line 312.
LaTeX Font Info:    Checking defaults for C35/song/m/n on input line 312.
LaTeX Font Info:    ... okay on input line 312.
LaTeX Font Info:    Checking defaults for C36/song/m/n on input line 312.
LaTeX Font Info:    ... okay on input line 312.
LaTeX Font Info:    Checking defaults for C37/song/m/n on input line 312.
LaTeX Font Info:    ... okay on input line 312.
LaTeX Font Info:    Checking defaults for C80/song/m/n on input line 312.
LaTeX Font Info:    ... okay on input line 312.
LaTeX Font Info:    Checking defaults for C81/song/m/n on input line 312.
LaTeX Font Info:    ... okay on input line 312.
LaTeX Font Info:    Checking defaults for C01/song/m/n on input line 312.
LaTeX Font Info:    ... okay on input line 312.
LaTeX Font Info:    Checking defaults for C11/song/m/n on input line 312.
LaTeX Font Info:    ... okay on input line 312.
LaTeX Font Info:    Checking defaults for C21/song/m/n on input line 312.
LaTeX Font Info:    ... okay on input line 312.
LaTeX Font Info:    Checking defaults for C41/song/m/n on input line 312.
LaTeX Font Info:    ... okay on input line 312.
LaTeX Font Info:    Checking defaults for C62/song/m/n on input line 312.
LaTeX Font Info:    ... okay on input line 312.
LaTeX Font Info:    Checking defaults for T5/cmr/m/n on input line 312.
LaTeX Font Info:    Try loading font information for T5+cmr on input line 312.

(c:/texlive/2017/texmf-dist/tex/latex/vntex/t5cmr.fd
File: t5cmr.fd 1999/05/25 v2.5h Standard LaTeX font definitions
)
LaTeX Font Info:    ... okay on input line 312.
LaTeX Font Info:    Checking defaults for T2A/cmr/m/n on input line 312.
LaTeX Font Info:    Try loading font information for T2A+cmr on input line 312.


(c:/texlive/2017/texmf-dist/tex/latex/cyrillic/t2acmr.fd
File: t2acmr.fd 2001/08/11 v1.0a Computer Modern Cyrillic font definitions
)
LaTeX Font Info:    ... okay on input line 312.
LaTeX Font Info:    Try loading font information for T1+ppl on input line 312.

(c:/texlive/2017/texmf-dist/tex/latex/psnfss/t1ppl.fd
File: t1ppl.fd 2001/06/04 font definitions for T1/ppl.
)
(c:/texlive/2017/texmf-dist/tex/context/base/mkii/supp-pdf.mkii
[Loading MPS to PDF converter (version 2006.09.02).]
\scratchcounter=\count195
\scratchdimen=\dimen281
\scratchbox=\box56
\nofMPsegments=\count196
\nofMParguments=\count197
\everyMPshowfont=\toks64
\MPscratchCnt=\count198
\MPscratchDim=\dimen282
\MPnumerator=\count199
\makeMPintoPDFobject=\count266
\everyMPtoPDFconversion=\toks65
)
Package lastpage Info: Please have a look at the pageslts package at
(lastpage)             https://www.ctan.org/pkg/pageslts
(lastpage)             ! on input line 312.
LaTeX Info: Redefining \microtypecontext on input line 312.
Package microtype Info: Generating PDF output.
Package microtype Info: Character protrusion enabled (level 2).
Package microtype Info: Using default protrusion set `alltext'.
Package microtype Info: Automatic font expansion enabled (level 2),
(microtype)             stretch: 20, shrink: 20, step: 1, non-selected.
Package microtype Info: Using default expansion set `basictext'.
Package microtype Info: No adjustment of tracking.
Package microtype Info: No adjustment of interword spacing.
Package microtype Info: No adjustment of character kerning.
 (c:/texlive/2017/texmf-dist/tex/latex/microtype/mt-ppl.cfg
File: mt-ppl.cfg 2005/11/16 v1.6 microtype config. file: Palatino (RS)
)
ABD: EveryShipout initializing macros
\AtBeginShipoutBox=\box57
Package hyperref Info: Link coloring ON on input line 312.

(c:/texlive/2017/texmf-dist/tex/latex/hyperref/nameref.sty
Package: nameref 2016/05/21 v2.44 Cross-referencing by name of section

(c:/texlive/2017/texmf-dist/tex/generic/oberdiek/gettitlestring.sty
Package: gettitlestring 2016/05/16 v1.5 Cleanup title references (HO)
)
\c@section@level=\count267
)
LaTeX Info: Redefining \ref on input line 312.
LaTeX Info: Redefining \pageref on input line 312.
LaTeX Info: Redefining \nameref on input line 312.

(./ijms-262949.out) (./ijms-262949.out)
\@outlinefile=\write6
\openout6 = `ijms-262949.out'.

LaTeX Font Info:    Redeclaring symbol font `AMSb' on input line 312.
LaTeX Font Info:    Overwriting symbol font `AMSb' in version `normal'
(Font)                  U/msb/m/n --> U/msb/m/n on input line 312.
LaTeX Font Info:    Overwriting symbol font `AMSb' in version `bold'
(Font)                  U/msb/m/n --> U/msb/m/n on input line 312.

*geometry* detected driver: pdftex
*geometry* verbose mode - [ preamble ] result:
* driver: pdftex
* paper: a4paper
* layout: <same size as paper>
* layoutoffset:(h,v)=(0.0pt,0.0pt)
* modes: includehead includefoot 
* h-part:(L,W,R)=(76.82234pt, 443.86319pt, 76.82234pt)
* v-part:(T,H,B)=(51.21504pt, 751.15268pt, 42.67912pt)
* \paperwidth=597.50787pt
* \paperheight=845.04684pt
* \textwidth=443.86319pt
* \textheight=684.15268pt
* \oddsidemargin=4.55235pt
* \evensidemargin=4.55235pt
* \topmargin=-21.05495pt
* \headheight=12.0pt
* \headsep=25.0pt
* \topskip=10.0pt
* \footskip=30.0pt
* \marginparwidth=65.0pt
* \marginparsep=11.0pt
* \columnsep=10.0pt
* \skip\footins=34.14322pt
* \hoffset=0.0pt
* \voffset=0.0pt
* \mag=1000
* \@twocolumnfalse
* \@twosidefalse
* \@mparswitchfalse
* \@reversemarginfalse
* (1in=72.27pt=25.4mm, 1cm=28.453pt)

Package caption Info: Begin \AtBeginDocument code.
Package caption Info: longtable package is loaded.
(c:/texlive/2017/texmf-dist/tex/latex/caption/ltcaption.sty
Package: ltcaption 2013/06/09 v1.4-94 longtable captions (AR)
)
Package caption Info: subfigure package is loaded.
Package caption Info: threeparttable package is loaded.
Package caption Info: End \AtBeginDocument code.


Package hyperref Warning: Token not allowed in a PDF string (Unicode):
(hyperref)                removing `math shift' on input line 312.


Package hyperref Warning: Token not allowed in a PDF string (Unicode):
(hyperref)                removing `\upmu' on input line 312.


Package hyperref Warning: Token not allowed in a PDF string (Unicode):
(hyperref)                removing `math shift' on input line 312.


Package hyperref Warning: Token not allowed in a PDF string (Unicode):
(hyperref)                removing `math shift' on input line 312.


Package hyperref Warning: Token not allowed in a PDF string (Unicode):
(hyperref)                removing `\upmu' on input line 312.


Package hyperref Warning: Token not allowed in a PDF string (Unicode):
(hyperref)                removing `math shift' on input line 312.

Package epstopdf Info: Source file: <Definitions/ijms-logo.eps>
(epstopdf)                    date: 2018-03-05 13:57:20
(epstopdf)                    size: 261134 bytes
(epstopdf)             Output file: <Definitions/ijms-logo-eps-converted-to.pdf
>
(epstopdf)                    date: 2018-06-19 14:07:14
(epstopdf)                    size: 18377 bytes
(epstopdf)             Command: <repstopdf --outfile=Definitions/ijms-logo-eps-
converted-to.pdf Definitions/ijms-logo.eps>
(epstopdf)             \includegraphics on input line 312.
Package epstopdf Info: Output file is already uptodate.
<Definitions/ijms-logo-eps-converted-to.pdf, id=91, 229.85875pt x 54.2025pt>
File: Definitions/ijms-logo-eps-converted-to.pdf Graphic file (type pdf)

<use Definitions/ijms-logo-eps-converted-to.pdf>
Package pdftex.def Info: Definitions/ijms-logo-eps-converted-to.pdf used on inp
ut line 312.
(pdftex.def)             Requested size: 144.79773pt x 34.14322pt.
Package epstopdf Info: Source file: <Definitions/logo-mdpi.eps>
(epstopdf)                    date: 2018-06-18 16:37:32
(epstopdf)                    size: 736786 bytes
(epstopdf)             Output file: <Definitions/logo-mdpi-eps-converted-to.pdf
>
(epstopdf)                    date: 2018-06-18 16:40:57
(epstopdf)                    size: 44135 bytes
(epstopdf)             Command: <repstopdf --outfile=Definitions/logo-mdpi-eps-
converted-to.pdf Definitions/logo-mdpi.eps>
(epstopdf)             \includegraphics on input line 312.
Package epstopdf Info: Output file is already uptodate.

<Definitions/logo-mdpi-eps-converted-to.pdf, id=93, 88.33pt x 58.2175pt>
File: Definitions/logo-mdpi-eps-converted-to.pdf Graphic file (type pdf)

<use Definitions/logo-mdpi-eps-converted-to.pdf>
Package pdftex.def Info: Definitions/logo-mdpi-eps-converted-to.pdf used on inp
ut line 312.
(pdftex.def)             Requested size: 43.16885pt x 28.45274pt.
LaTeX Font Info:    Font shape `T1/ppl/bx/n' in size <18> not available
(Font)              Font shape `T1/ppl/b/n' tried instead on input line 312.
LaTeX Font Info:    Font shape `T1/ppl/bx/it' in size <18> not available
(Font)              Font shape `T1/ppl/b/it' tried instead on input line 312.
LaTeX Font Info:    Try loading font information for OT1+ppl on input line 312.


(c:/texlive/2017/texmf-dist/tex/latex/psnfss/ot1ppl.fd
File: ot1ppl.fd 2001/06/04 font definitions for OT1/ppl.
)
LaTeX Font Info:    Try loading font information for OML+zplm on input line 312
.

(c:/texlive/2017/texmf-dist/tex/latex/psnfss/omlzplm.fd
File: omlzplm.fd 2002/09/08 Fontinst v1.914 font definitions for OML/zplm.
)
LaTeX Font Info:    Try loading font information for OMS+zplm on input line 312
.

(c:/texlive/2017/texmf-dist/tex/latex/psnfss/omszplm.fd
File: omszplm.fd 2002/09/08 Fontinst v1.914 font definitions for OMS/zplm.
)
LaTeX Font Info:    Try loading font information for OMX+zplm on input line 312
.

(c:/texlive/2017/texmf-dist/tex/latex/psnfss/omxzplm.fd
File: omxzplm.fd 2002/09/08 Fontinst v1.914 font definitions for OMX/zplm.
)
LaTeX Font Info:    Try loading font information for OT1+zplm on input line 312
.

(c:/texlive/2017/texmf-dist/tex/latex/psnfss/ot1zplm.fd
File: ot1zplm.fd 2002/09/08 Fontinst v1.914 font definitions for OT1/zplm.
)
Package microtype Info: Loading generic settings for font family
(microtype)             `zplm' (encoding: OT1).
(microtype)             For optimal results, create family-specific settings.
(microtype)             See the microtype manual for details.

(c:/texlive/2017/texmf-dist/tex/latex/microtype/mt-cmr.cfg
File: mt-cmr.cfg 2013/05/19 v2.2 microtype config. file: Computer Modern Roman 
(RS)
)
LaTeX Font Info:    Font shape `U/msa/m/n' will be
(Font)              scaled to size 10.42007pt on input line 312.

(c:/texlive/2017/texmf-dist/tex/latex/microtype/mt-msa.cfg
File: mt-msa.cfg 2006/02/04 v1.1 microtype config. file: AMS symbols (a) (RS)
)
LaTeX Font Info:    Font shape `U/msa/m/n' will be
(Font)              scaled to size 7.91925pt on input line 312.
LaTeX Font Info:    Font shape `U/msa/m/n' will be
(Font)              scaled to size 6.25204pt on input line 312.
LaTeX Font Info:    Font shape `U/msb/m/n' will be
(Font)              scaled to size 10.42007pt on input line 312.

(c:/texlive/2017/texmf-dist/tex/latex/microtype/mt-msb.cfg
File: mt-msb.cfg 2005/06/01 v1.0 microtype config. file: AMS symbols (b) (RS)
)
LaTeX Font Info:    Font shape `U/msb/m/n' will be
(Font)              scaled to size 7.91925pt on input line 312.
LaTeX Font Info:    Font shape `U/msb/m/n' will be
(Font)              scaled to size 6.25204pt on input line 312.

(c:/texlive/2017/texmf-dist/tex/latex/microtype/mt-eur.cfg
File: mt-eur.cfg 2006/07/31 v1.1 microtype config. file: AMS Euler Roman (RS)
)
LaTeX Font Info:    Try loading font information for U+wasy on input line 312.

(c:/texlive/2017/texmf-dist/tex/latex/wasysym/uwasy.fd
File: uwasy.fd 2003/10/30 v2.0 Wasy-2 symbol font definitions
)
LaTeX Font Info:    Font shape `T1/ppl/bx/n' in size <10> not available
(Font)              Font shape `T1/ppl/b/n' tried instead on input line 312.


LaTeX Font Warning: Font shape `U/wasy/b/n' in size <7.6> not available
(Font)              Font shape `U/wasy/m/n' tried instead on input line 312.


LaTeX Font Warning: Font shape `U/wasy/b/n' in size <6> not available
(Font)              Font shape `U/wasy/m/n' tried instead on input line 312.

LaTeX Font Info:    Font shape `T1/ppl/bx/n' in size <7.6> not available
(Font)              Font shape `T1/ppl/b/n' tried instead on input line 312.
LaTeX Font Info:    Try loading font information for T1+qag on input line 312.
(c:/texlive/2017/texmf-dist/tex/latex/tex-gyre/t1qag.fd
File: t1qag.fd 2009/09/25 v1.2 font definition file for T1/qag
)
LaTeX Font Info:    Font shape `T1/qag/bx/n' in size <10> not available
(Font)              Font shape `T1/qag/b/n' tried instead on input line 312.
Package microtype Info: Loading generic settings for font family
(microtype)             `qag' (encoding: T1).
(microtype)             For optimal results, create family-specific settings.
(microtype)             See the microtype manual for details.
LaTeX Font Info:    Font shape `T1/qag/bx/n' in size <5> not available
(Font)              Font shape `T1/qag/b/n' tried instead on input line 312.
LaTeX Font Info:    Try loading font information for T5+ppl on input line 312.

(c:/texlive/2017/texmf-dist/tex/latex/vntex/t5ppl.fd
File: t5upl.fd 2005/08/24 Fontinst v1.929 font definitions for T5/ppl.
)
LaTeX Font Info:    Font shape `T5/ppl/bx/n' in size <10> not available
(Font)              Font shape `T5/ppl/b/n' tried instead on input line 312.


Package microtype Warning: I cannot find a protrusion list for font
(microtype)                `T5/ppl/b/n/10'. Switching off
(microtype)                protrusion for this font on input line 312.

LaTeX Font Info:    Font shape `U/msa/m/n' will be
(Font)              scaled to size 9.37807pt on input line 312.
LaTeX Font Info:    Font shape `U/msa/m/n' will be
(Font)              scaled to size 7.29405pt on input line 312.
LaTeX Font Info:    Font shape `U/msa/m/n' will be
(Font)              scaled to size 5.21004pt on input line 312.
LaTeX Font Info:    Font shape `U/msb/m/n' will be
(Font)              scaled to size 9.37807pt on input line 312.
LaTeX Font Info:    Font shape `U/msb/m/n' will be
(Font)              scaled to size 7.29405pt on input line 312.
LaTeX Font Info:    Font shape `U/msb/m/n' will be
(Font)              scaled to size 5.21004pt on input line 312.

Package microtype Warning: I cannot find a protrusion list for font
(microtype)                `T5/ppl/m/n/9'. Switching off
(microtype)                protrusion for this font on input line 312.

LaTeX Font Info:    Font shape `T1/ppl/bx/n' in size <9> not available
(Font)              Font shape `T1/ppl/b/n' tried instead on input line 312.
LaTeX Font Info:    Font shape `T1/ppl/bx/n' in size <8> not available
(Font)              Font shape `T1/ppl/b/n' tried instead on input line 312.
[1
Non-PDF special ignored!


{c:/texlive/2017/texmf-var/fonts/map/pdftex/updmap/pdftex.map} <./Definitions/i
jms-logo-eps-converted-to.pdf> <./Definitions/logo-mdpi-eps-converted-to.pdf>]
Underfull \hbox (badness 1701) in paragraph at lines 323--324
[]\T1/ppl/m/n/10 (+20) The ac-tiv-ity of a molecule is char-ac-terised not only
 by its bi-o-log-i-cal ac-tiv-ity against
 []


pdfTeX warning: pdflatex.exe (file ./ijms-262949-g001.pdf): PDF inclusion: foun
d PDF version <1.6>, but at most version <1.5> allowed
<ijms-262949-g001.pdf, id=148, 356.33728pt x 252.52846pt>
File: ijms-262949-g001.pdf Graphic file (type pdf)

<use ijms-262949-g001.pdf>
Package pdftex.def Info: ijms-262949-g001.pdf used on input line 332.
(pdftex.def)             Requested size: 356.33641pt x 252.52783pt.
 [2]

pdfTeX warning: pdflatex.exe (file ./ijms-262949-g002.pdf): PDF inclusion: foun
d PDF version <1.6>, but at most version <1.5> allowed
<ijms-262949-g002.pdf, id=168, 295.22897pt x 203.56853pt>
File: ijms-262949-g002.pdf Graphic file (type pdf)

<use ijms-262949-g002.pdf>
Package pdftex.def Info: ijms-262949-g002.pdf used on input line 340.
(pdftex.def)             Requested size: 259.80229pt x 179.14084pt.

Overfull \hbox (4.03043pt too wide) in paragraph at lines 431--431
 []|\T1/ppl/b/n/9 Piplartine| 
 []


Overfull \hbox (0.81158pt too wide) in paragraph at lines 431--431
 []|\T1/ppl/m/n/9 (-20) Moderate| 
 []

LaTeX Font Info:    Font shape `U/msa/m/n' will be
(Font)              scaled to size 8.33606pt on input line 435.
LaTeX Font Info:    Font shape `U/msb/m/n' will be
(Font)              scaled to size 8.33606pt on input line 435.

Underfull \hbox (badness 2134) in paragraph at lines 349--437
[]\T1/ppl/m/n/10 (+20) To in-ves-ti-gate the dif-fer-ences be-tween pi-plar-tin
e and its ana-logues, a struc-tural and
 []

[3 <./ijms-262949-g001.pdf> <./ijms-262949-g002.pdf>] [4]
LaTeX Font Info:    Font shape `T1/ppl/bx/n' in size <7> not available
(Font)              Font shape `T1/ppl/b/n' tried instead on input line 542.


pdfTeX warning: pdflatex.exe (file ./ijms-262949-g003.pdf): PDF inclusion: foun
d PDF version <1.6>, but at most version <1.5> allowed
<ijms-262949-g003.pdf, id=237, 355.3044pt x 407.86377pt>
File: ijms-262949-g003.pdf Graphic file (type pdf)

<use ijms-262949-g003.pdf>
Package pdftex.def Info: ijms-262949-g003.pdf used on input line 552.
(pdftex.def)             Requested size: 355.30353pt x 407.86276pt.
 [5]

pdfTeX warning: pdflatex.exe (file ./ijms-262949-g004.pdf): PDF inclusion: foun
d PDF version <1.6>, but at most version <1.5> allowed
<ijms-262949-g004.pdf, id=246, 358.45819pt x 439.39958pt>
File: ijms-262949-g004.pdf Graphic file (type pdf)

<use ijms-262949-g004.pdf>
Package pdftex.def Info: ijms-262949-g004.pdf used on input line 560.
(pdftex.def)             Requested size: 358.4573pt x 439.39851pt.
 [6 <./ijms-262949-g003.pdf>]

pdfTeX warning: pdflatex.exe (file ./ijms-262949-g005.pdf): PDF inclusion: foun
d PDF version <1.6>, but at most version <1.5> allowed
<ijms-262949-g005.pdf, id=276, 328.49927pt x 392.62183pt>
File: ijms-262949-g005.pdf Graphic file (type pdf)

<use ijms-262949-g005.pdf>
Package pdftex.def Info: ijms-262949-g005.pdf used on input line 570.
(pdftex.def)             Requested size: 328.49846pt x 392.62086pt.
 [7 <./ijms-262949-g004.pdf>] [8 <./ijms-262949-g005.pdf>] [9] [10]

Package microtype Warning: I cannot find a protrusion list for font
(microtype)                `T5/ppl/m/n/10'. Switching off
(microtype)                protrusion for this font on input line 688.

[11]
Underfull \hbox (badness 1331) in paragraph at lines 706--707
\T1/ppl/m/n/10 (+20) us-ing An-other Molec-u-lar Mod-el-ing Program---Vis (AMMP
-Vis) (AMMP 2.0, Mon-terey, CA,
 []

[12]
LaTeX Font Info:    Try loading font information for TS1+ppl on input line 716.

 (c:/texlive/2017/texmf-dist/tex/latex/psnfss/ts1ppl.fd
File: ts1ppl.fd 2001/06/04 font definitions for TS1/ppl.
) [13]

Package microtype Warning: I cannot find a protrusion list for font
(microtype)                `T5/ppl/m/it/9'. Switching off
(microtype)                protrusion for this font on input line 760.


Underfull \hbox (badness 6236) in paragraph at lines 763--763
\T1/ppl/b/n/9 Author Con-tri-bu-tions: \T1/ppl/m/n/9 (+20) Con-ceived and de-si
gned the ex-per-i-ments: Yuri Dias Macedo Campelo,
 []


Underfull \hbox (badness 10000) in paragraph at lines 763--763
[]\T1/ppl/m/n/9 (+20) , Alexan-dra Pl\T5/ppl/m/n/9 (+20) �\T1/ppl/m/n/9 (+20) c
ido, Ly-dia Fu-miko Ya-m-aguchi Yvonne P. Mas-caren-has,
 []


Underfull \hbox (badness 2065) in paragraph at lines 763--763
[]\T1/ppl/m/n/9 (+20) ; Per-formed the ex-per-i-ments: Yuri Dias Macedo Campelo
, Ali-cia Om-bredane,
 []

[14] [15] [16]
Package epstopdf Info: Source file: <Definitions/logo-ccby.eps>
(epstopdf)                    date: 2018-06-18 16:37:32
(epstopdf)                    size: 484140 bytes
(epstopdf)             Output file: <Definitions/logo-ccby-eps-converted-to.pdf
>
(epstopdf)                    date: 2018-06-18 16:41:01
(epstopdf)                    size: 11987 bytes
(epstopdf)             Command: <repstopdf --outfile=Definitions/logo-ccby-eps-
converted-to.pdf Definitions/logo-ccby.eps>
(epstopdf)             \includegraphics on input line 925.
Package epstopdf Info: Output file is already uptodate.

<Definitions/logo-ccby-eps-converted-to.pdf, id=567, 120.45pt x 42.1575pt>
File: Definitions/logo-ccby-eps-converted-to.pdf Graphic file (type pdf)

<use Definitions/logo-ccby-eps-converted-to.pdf>
Package pdftex.def Info: Definitions/logo-ccby-eps-converted-to.pdf used on inp
ut line 925.
(pdftex.def)             Requested size: 83.4452pt x 29.2064pt.

Underfull \hbox (badness 10000) in paragraph at lines 925--925

 []


AED: lastpage setting LastPage
[17 <./Definitions/logo-ccby-eps-converted-to.pdf>]
Package atveryend Info: Empty hook `BeforeClearDocument' on input line 925.
Package atveryend Info: Empty hook `AfterLastShipout' on input line 925.
 (./ijms-262949.aux)
Package atveryend Info: Executing hook `AtVeryEndDocument' on input line 925.
Package atveryend Info: Executing hook `AtEndAfterFileList' on input line 925.
Package rerunfilecheck Info: File `ijms-262949.out' has not changed.
(rerunfilecheck)             Checksum: 6088DD98027EE92B1008AF9C015ADFC5;4152.
 ) 
Here is how much of TeX's memory you used:
 32827 strings out of 492995
 547885 string characters out of 6136402
 703705 words of memory out of 5000000
 35088 multiletter control sequences out of 15000+600000
 125363 words of font info for 490 fonts, out of 8000000 for 9000
 1141 hyphenation exceptions out of 8191
 62i,21n,60p,2568b,753s stack positions out of 5000i,500n,10000p,200000b,80000s
{c:/texlive/2017/texmf-dist/fonts/enc/dvips/vntex/t5.enc}{c:/texlive/2017/tex
mf-dist/fonts/enc/dvips/base/8r.enc}{c:/texlive/2017/texmf-dist/fonts/enc/dvips
/tex-gyre/q-ec.enc}<c:/texlive/2017/texmf-dist/fonts/type1/public/amsfonts/cm/c
mbsy10.pfb><c:/texlive/2017/texmf-dist/fonts/type1/public/amsfonts/cm/cmsy10.pf
b><c:/texlive/2017/texmf-dist/fonts/type1/public/amsfonts/euler/eurm10.pfb><c:/
texlive/2017/texmf-dist/fonts/type1/public/tex-gyre/qagb.pfb><c:/texlive/2017/t
exmf-dist/fonts/type1/urw/palatino/uplb8a.pfb><c:/texlive/2017/texmf-dist/fonts
/type1/vntex/urwvn/uplb8v.pfb><c:/texlive/2017/texmf-dist/fonts/type1/urw/palat
ino/uplbi8a.pfb><c:/texlive/2017/texmf-dist/fonts/type1/urw/palatino/uplr8a.pfb
><c:/texlive/2017/texmf-dist/fonts/type1/vntex/urwvn/uplr8v.pfb><c:/texlive/201
7/texmf-dist/fonts/type1/urw/palatino/uplri8a.pfb><c:/texlive/2017/texmf-dist/f
onts/type1/vntex/urwvn/uplri8v.pfb>
Output written on ijms-262949.pdf (17 pages, 2362396 bytes).
PDF statistics:
 641 PDF objects out of 1000 (max. 8388607)
 517 compressed objects within 6 object streams
 94 named destinations out of 1000 (max. 500000)
 92893 words of extra memory for PDF output out of 106986 (max. 10000000)
