# Supplementary material for: Structure–Activity Relationship of Piplartine and Synthetic Analogues against Schistosoma mansoni and Cytotoxicity to Mammalian Cells
Source: MDPI journal article supplement (doi:10.3390/ijms19061802), 2018-06-19
Supplement: s2 [file s2 › ijms-262949.out]

\BOOKMARK [1][]{section.1}{\376\377\000I\000n\000t\000r\000o\000d\000u\000c\000t\000i\000o\000n\000\040}{}% 1
\BOOKMARK [1][]{section.2}{\376\377\000R\000e\000s\000u\000l\000t\000s\000\040}{}% 2
\BOOKMARK [2][]{subsection.2.1}{\376\377\000T\000h\000e\000o\000r\000e\000t\000i\000c\000a\000l\000\040\000C\000a\000l\000c\000u\000l\000a\000t\000i\000o\000n\000s\000\040\000a\000n\000d\000\040\000U\000l\000t\000r\000a\000v\000i\000o\000l\000e\000t\040\023\000V\000i\000s\000i\000b\000l\000e\000\040\000A\000b\000s\000o\000r\000p\000t\000i\000o\000n\000\040\000S\000p\000e\000c\000t\000r\000a\000\040}{section.2}% 3
\BOOKMARK [2][]{subsection.2.2}{\376\377\000I\000n\000\040\000S\000i\000l\000i\000c\000o\000\040\000S\000t\000u\000d\000i\000e\000s\000\040\000I\000n\000f\000o\000r\000m\000a\000t\000i\000o\000n\000\040}{section.2}% 4
\BOOKMARK [2][]{subsection.2.3}{\376\377\000C\000y\000t\000o\000t\000o\000x\000i\000c\000i\000t\000y\000\040\000A\000s\000s\000a\000y\000\040}{section.2}% 5
\BOOKMARK [2][]{subsection.2.4}{\376\377\000I\000n\000\040\000V\000i\000t\000r\000o\000\040\000E\000x\000p\000e\000r\000i\000m\000e\000n\000t\000s\000\040\000i\000n\000\040\000A\000d\000u\000l\000t\000\040\000W\000o\000r\000m\000s\000\040\000o\000f\000\040\000S\000.\000\040\000m\000a\000n\000s\000o\000n\000i\000\040}{section.2}% 6
\BOOKMARK [1][]{section.3}{\376\377\000D\000i\000s\000c\000u\000s\000s\000i\000o\000n\000\040}{}% 7
\BOOKMARK [1][]{section.4}{\376\377\000M\000a\000t\000e\000r\000i\000a\000l\000s\000\040\000a\000n\000d\000\040\000M\000e\000t\000h\000o\000d\000s\000\040}{}% 8
\BOOKMARK [2][]{subsection.4.1}{\376\377\000P\000i\000p\000l\000a\000r\000t\000i\000n\000e\000\040\000a\000n\000d\000\040\000S\000y\000n\000t\000h\000e\000t\000i\000c\000\040\000A\000n\000a\000l\000o\000g\000u\000e\000s\000\040}{section.4}% 9
\BOOKMARK [2][]{subsection.4.2}{\376\377\000T\000h\000e\000o\000r\000e\000t\000i\000c\000a\000l\000\040\000C\000a\000l\000c\000u\000l\000a\000t\000i\000o\000n\000s\000\040}{section.4}% 10
\BOOKMARK [2][]{subsection.4.3}{\376\377\000U\000V\040\023\000V\000i\000s\000\040\000A\000b\000s\000o\000r\000p\000t\000i\000o\000n\000\040\000S\000p\000e\000c\000t\000r\000a\000\040}{section.4}% 11
\BOOKMARK [2][]{subsection.4.4}{\376\377\000I\000n\000\040\000S\000i\000l\000i\000c\000o\000\040\000P\000h\000y\000s\000i\000c\000o\000c\000h\000e\000m\000i\000c\000a\000l\000\040\000a\000n\000d\000\040\000T\000o\000x\000i\000c\000i\000t\000y\000\040\000S\000t\000u\000d\000i\000e\000s\000\040}{section.4}% 12
\BOOKMARK [2][]{subsection.4.5}{\376\377\000C\000y\000t\000o\000t\000o\000x\000i\000c\000i\000t\000y\000\040\000A\000s\000s\000a\000y\000\040}{section.4}% 13
\BOOKMARK [3][]{subsubsection.4.5.1}{\376\377\000N\000I\000H\0003\000T\0003\000\040\000a\000n\000d\000\040\000J\0007\0007\0004\000A\000.\0001\000\040\000C\000e\000l\000l\000\040\000C\000u\000l\000t\000u\000r\000e\000\040}{subsection.4.5}% 14
\BOOKMARK [3][]{subsubsection.4.5.2}{\376\377\000C\000e\000l\000l\000\040\000V\000i\000a\000b\000i\000l\000i\000t\000y\000\040\000A\000s\000s\000a\000y\000s\000\040}{subsection.4.5}% 15
\BOOKMARK [2][]{subsection.4.6}{\376\377\000A\000n\000i\000m\000a\000l\000s\000\040\000a\000n\000d\000\040\000P\000a\000r\000a\000s\000i\000t\000e\000s\000\040}{section.4}% 16
\BOOKMARK [2][]{subsection.4.7}{\376\377\000A\000d\000u\000l\000t\000\040\000S\000c\000h\000i\000s\000t\000o\000s\000o\000m\000e\000s\000\040}{section.4}% 17
\BOOKMARK [2][]{subsection.4.8}{\376\377\000I\000n\000\040\000V\000i\000t\000r\000o\000\040\000E\000x\000p\000e\000r\000i\000m\000e\000n\000t\000s\000\040\000w\000i\000t\000h\000\040\000A\000d\000u\000l\000t\000\040\000W\000o\000r\000m\000s\000\040\000o\000f\000\040\000S\000.\000\040\000m\000a\000n\000s\000o\000n\000i\000\040}{section.4}% 18
\BOOKMARK [2][]{subsection.4.9}{\376\377\000S\000t\000a\000t\000i\000s\000t\000i\000c\000a\000l\000\040\000A\000n\000a\000l\000y\000s\000i\000s\000\040}{section.4}% 19
\BOOKMARK [1][]{section.5}{\376\377\000C\000o\000n\000c\000l\000u\000s\000i\000o\000n\000s\000\040}{}% 20
\BOOKMARK [1][]{section.5}{\376\377\000R\000e\000f\000e\000r\000e\000n\000c\000e\000s}{}% 21
