# Supplementary figures and images for: Structure–Activity Relationship of Piplartine and Synthetic Analogues against Schistosoma mansoni and Cytotoxicity to Mammalian Cells
Source: MDPI journal article supplement (doi:10.3390/ijms19061802), 2018-06-19

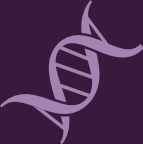

# International Journal of *Molecular Sciences*

Supplement: s2 [file s2]

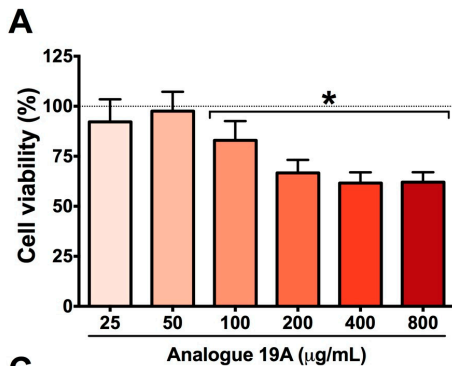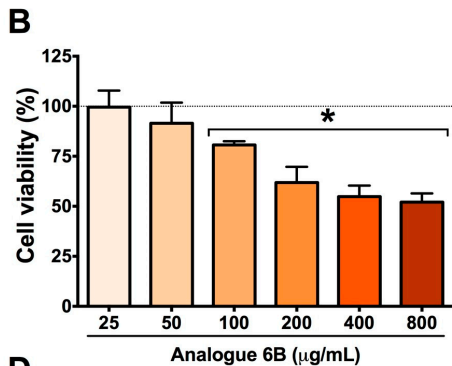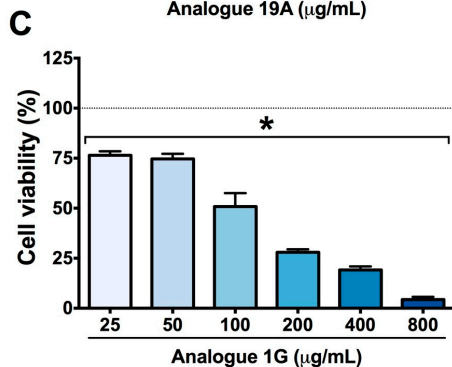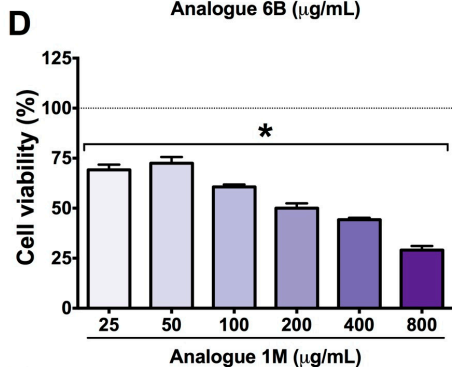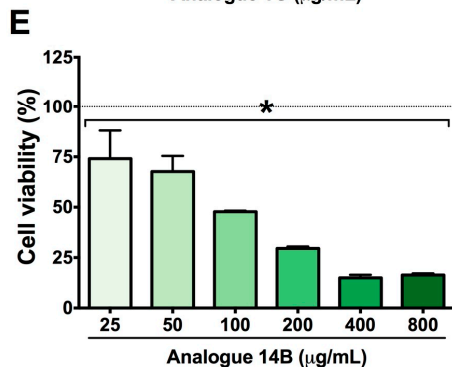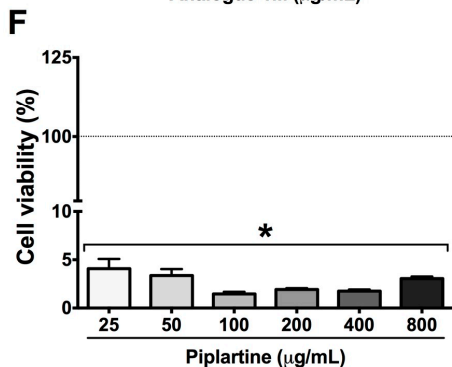

Supplement: s2 [file s2]

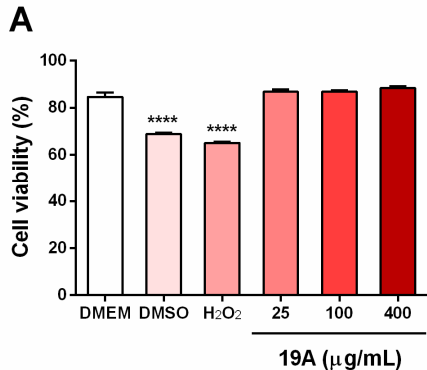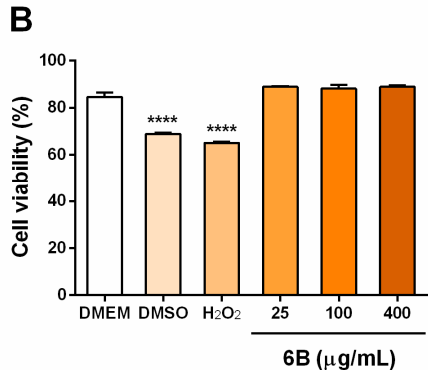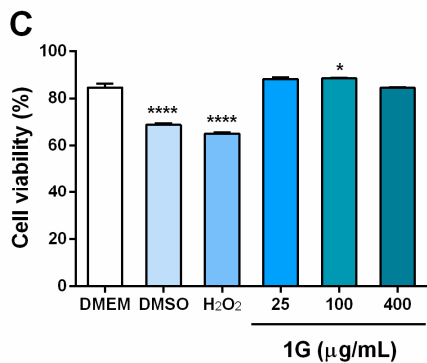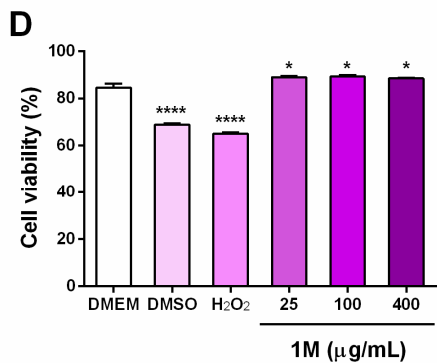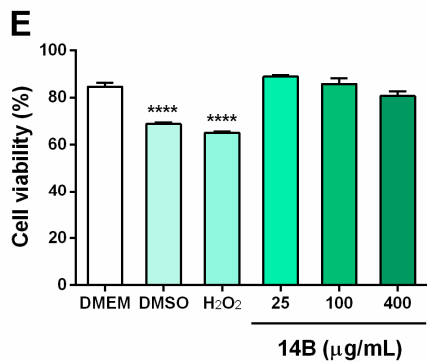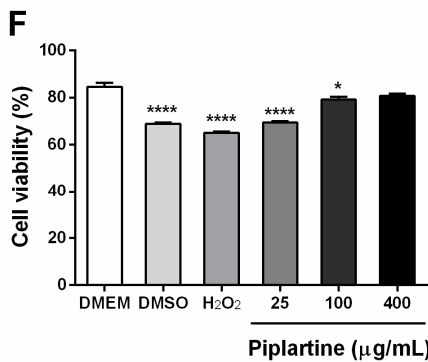

Supplement: s2 [file s2]

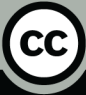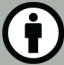

BY

Supplement: s2 [file s2]



# International Journal of *Molecular Sciences*

Supplement: s2 [file s2]

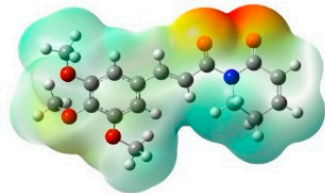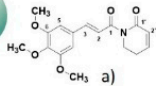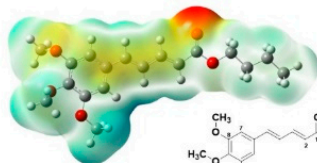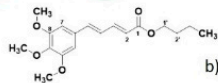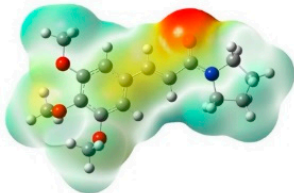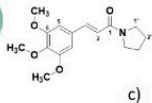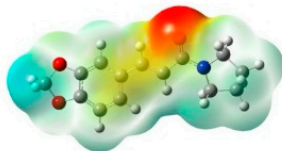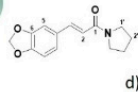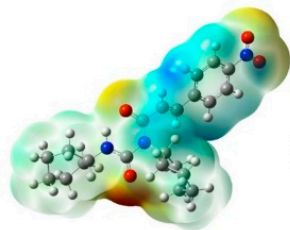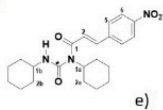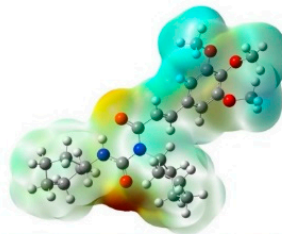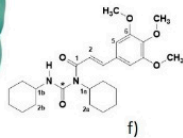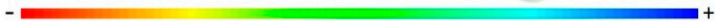

Supplement: s2 [file s2]

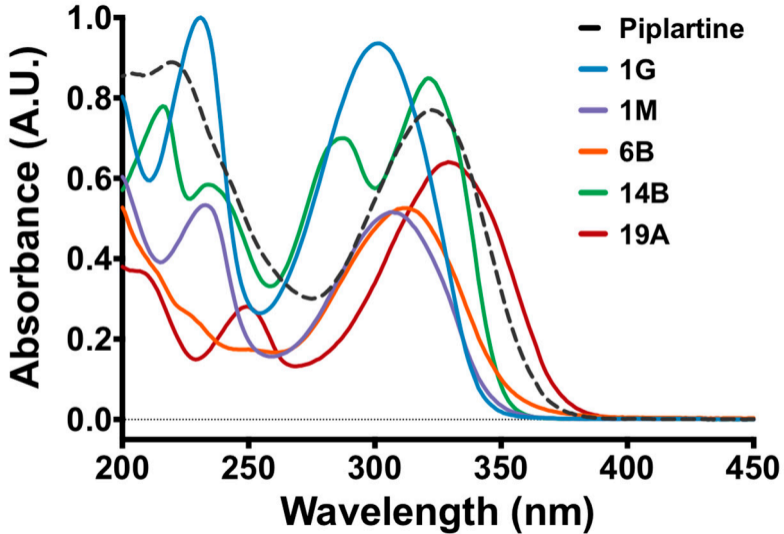

Supplement: s2 [file s2]



BY

Supplement: s2 [file s2]

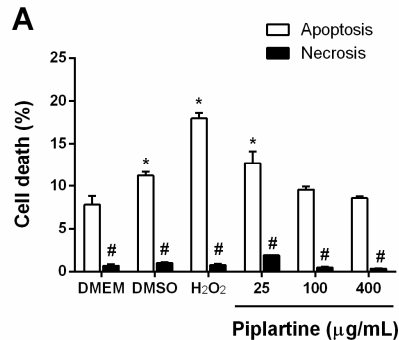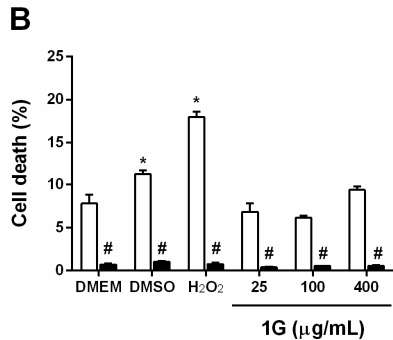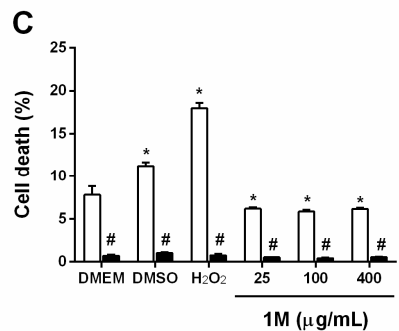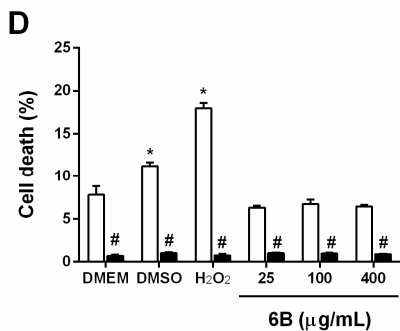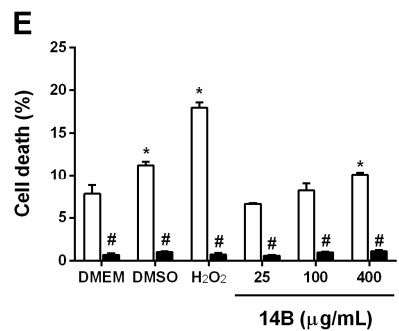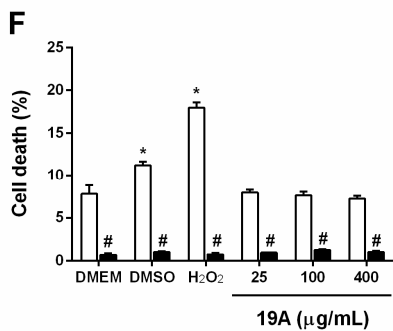

Supplement: s2 [file s2]

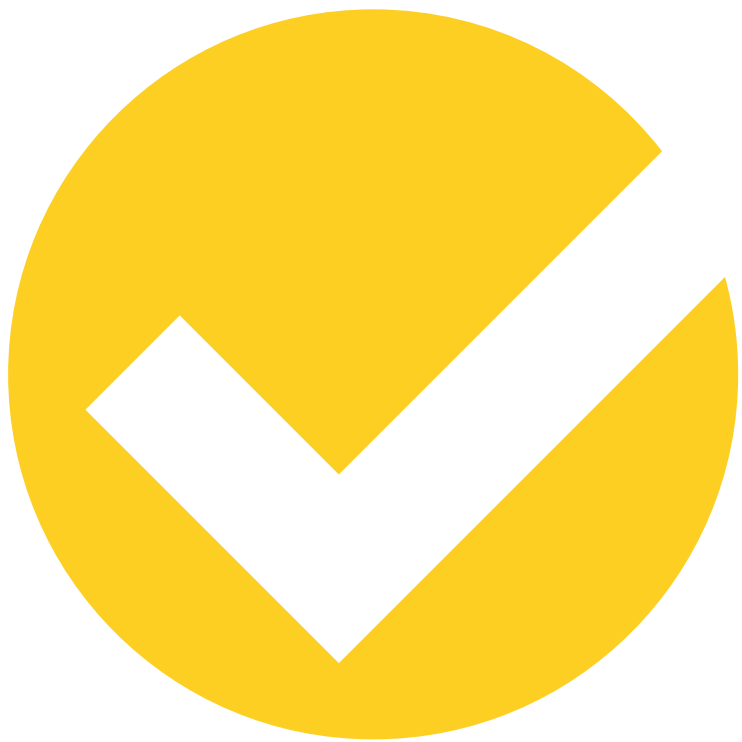

check for  
updates

Supplement: s2 [file s2 › Definitions/logo-updates.pdf]
